# Supplementary material for: Halimeda tuna (Bryopsidales, Ulvophyceae) calcification on the depth transect in the northern Adriatic Sea; carbonate production on the microscale of individual segments
Source: PeerJ. 2023 Mar 16;11:e15061. doi: 10.7717/peerj.15061 (PMC10024899; doi:10.7717/peerj.15061)
Supplement: Supplemental Information 1 — Order of segments corresponds to Table S2. [file peerj-11-15061-s001.xls]

## Sheet: proS1
Table S1. Landmark and semilandmark coordinates of Halimeda tuna segment outlines. Order of segments corresponds to Table S2.
0.0033931305	-0.1330360500	-0.0025374885	-0.1331708500	-0.0085874085	-0.1311376500	-0.0144296250	-0.1291407000	-0.0193883250	-0.1267891000	-0.0231282200	-0.1228735000	-0.0262545450	-0.1179213000	-0.0296517050	-0.1127277000	-0.0323716550	-0.1076347000	-0.0331824300	-0.1013891000	-0.0354058800	-0.0944608300	-0.0386211800	-0.0875356450	-0.0418877850	-0.0799941600	-0.0457408300	-0.0710926000	-0.0464815250	-0.0620621300	-0.0471015650	-0.0518162700	-0.0493153800	-0.0420867800	-0.0500784950	-0.0308144550	-0.0518781000	-0.0196159350	-0.0547403900	-0.0085704720	-0.0577640400	0.0019352465	-0.0604702650	0.0129265300	-0.0643107700	0.0232193400	-0.0671393350	0.0336765500	-0.0695777750	0.0440749800
0.0029078165	-0.1140085000	-0.0064613995	-0.1142907500	-0.0160080750	-0.1143766000	-0.0243771000	-0.1147800500	-0.0309278850	-0.1147362500	-0.0362930100	-0.1123252500	-0.0407046550	-0.1084806500	-0.0431112800	-0.1027406500	-0.0450006350	-0.0968760950	-0.0471470250	-0.0900315850	-0.0501530250	-0.0824679700	-0.0519590400	-0.0739010850	-0.0551853000	-0.0652996950	-0.0594899750	-0.0559641150	-0.0667722000	-0.0496577650	-0.0742338700	-0.0424716800	-0.0822978450	-0.0364489600	-0.0902361600	-0.0287733950	-0.0985151150	-0.0220789400	-0.1062295000	-0.0148626100	-0.1121179500	-0.0065287320	-0.1160718500	0.0028947575	-0.1186997000	0.0122695400	-0.1199252500	0.0220556200	-0.1201424500	0.0317889150
0.0024651995	-0.0966547300	-0.0069678815	-0.0974731450	-0.0168372850	-0.0987231050	-0.0260551000	-0.0989027500	-0.0339318150	-0.0984422100	-0.0412709100	-0.0965260100	-0.0482125500	-0.0940828350	-0.0542410750	-0.0901660450	-0.0606759650	-0.0874479450	-0.0673098400	-0.0830839650	-0.0747129450	-0.0785247800	-0.0824680700	-0.0739013000	-0.0896020900	-0.0686492400	-0.0970241650	-0.0623291450	-0.1037029500	-0.0564795050	-0.1100978500	-0.0503216150	-0.1146513000	-0.0438817400	-0.1194179500	-0.0367454300	-0.1217839000	-0.0291208450	-0.1223219500	-0.0207340400	-0.1211175500	-0.0118527900	-0.1193071000	-0.0021269495	-0.1176360000	0.0074444390	-0.1175893000	0.0175518000	-0.1165895000	0.0274069000
0.0026541540	-0.1040633500	-0.0065188965	-0.1043291000	-0.0160069700	-0.1038890500	-0.0242764200	-0.1027940000	-0.0307696500	-0.1002801200	-0.0360027400	-0.0964160050	-0.0419235250	-0.0924993800	-0.0486286600	-0.0889239200	-0.0556529650	-0.0857827800	-0.0635516700	-0.0823887500	-0.0720606500	-0.0785004800	-0.0810831400	-0.0751688550	-0.0893919350	-0.0714456400	-0.0976940450	-0.0663802650	-0.1048508000	-0.0612783500	-0.1101555500	-0.0545005400	-0.1133748500	-0.0467968750	-0.1155003500	-0.0373891650	-0.1162377000	-0.0277202150	-0.1169441500	-0.0179137500	-0.1195186000	-0.0080751100	-0.1206483000	0.0023029670	-0.1222650500	0.0116717100	-0.1212962500	0.0212800550	-0.1187525500	0.0308757600
0.0022412935	-0.0878762100	-0.0085300590	-0.0895190300	-0.0197589250	-0.0896143750	-0.0296061150	-0.0877606850	-0.0379184300	-0.0876138000	-0.0458170200	-0.0870151500	-0.0528958900	-0.0847586350	-0.0601426800	-0.0828803950	-0.0666638850	-0.0803277950	-0.0737367200	-0.0771002550	-0.0813217800	-0.0733227900	-0.0888297250	-0.0691918250	-0.0956693150	-0.0641919000	-0.1034985000	-0.0589038650	-0.1104981500	-0.0538308300	-0.1161975000	-0.0475056550	-0.1210336500	-0.0413140450	-0.1251536000	-0.0340399950	-0.1274629500	-0.0260734450	-0.1288435500	-0.0173496250	-0.1292153000	-0.0083404275	-0.1301241000	0.0010875383	-0.1306316000	0.0100566755	-0.1300257500	0.0190569550	-0.1290049500	0.0276230150
0.0032788300	-0.1285557500	-0.0053003400	-0.1281377500	-0.0140138450	-0.1254599500	-0.0220606600	-0.1238128500	-0.0283875550	-0.1217985000	-0.0344034350	-0.1187906000	-0.0397945000	-0.1152435000	-0.0444449650	-0.1117035000	-0.0485997200	-0.1084909000	-0.0527442400	-0.1035624000	-0.0561765150	-0.0967192600	-0.0604460600	-0.0898789000	-0.0615480600	-0.0815896600	-0.0636913850	-0.0715977150	-0.0643213600	-0.0619404750	-0.0658874300	-0.0514468650	-0.0647474200	-0.0411572800	-0.0633409300	-0.0297118500	-0.0641245150	-0.0182023950	-0.0655563100	-0.0067237610	-0.0680051150	0.0042928615	-0.0697758650	0.0151664250	-0.0700115750	0.0245643550	-0.0710484000	0.0338342750	-0.0760305000	0.0417353600
0.0024454435	-0.0958808550	-0.0089549140	-0.0968594650	-0.0207809950	-0.0989512450	-0.0310293450	-0.1010901500	-0.0390508050	-0.1034141000	-0.0457935000	-0.1041942000	-0.0515125000	-0.1023026000	-0.0559053150	-0.0989522050	-0.0595125150	-0.0947869700	-0.0627643200	-0.0895690700	-0.0671778900	-0.0839981600	-0.0717162100	-0.0775347800	-0.0767277750	-0.0708515300	-0.0833551750	-0.0629763650	-0.0901009100	-0.0561293000	-0.0960074800	-0.0481409500	-0.1014010500	-0.0405615900	-0.1078933500	-0.0330211950	-0.1126070500	-0.0246487850	-0.1151537000	-0.0155544050	-0.1158897000	-0.0066460160	-0.1165698500	0.0022069345	-0.1196284500	0.0103250500	-0.1213266500	0.0189328900	-0.1200121500	0.0276016750
0.0022545820	-0.0883977700	-0.0083578295	-0.0887848050	-0.0193287100	-0.0913258800	-0.0292129450	-0.0929770550	-0.0375673850	-0.0934137450	-0.0451172400	-0.0925820200	-0.0520000550	-0.0895808250	-0.0586866800	-0.0864222600	-0.0648839000	-0.0827411200	-0.0718821550	-0.0793700050	-0.0794971250	-0.0756915250	-0.0875714350	-0.0721671800	-0.0949826000	-0.0679357650	-0.1031215500	-0.0635113350	-0.1098722000	-0.0584107250	-0.1155202000	-0.0523644900	-0.1188249000	-0.0452349700	-0.1220127500	-0.0369364500	-0.1237166500	-0.0282574750	-0.1260528000	-0.0194058650	-0.1264514000	-0.0101426005	-0.1252370500	-0.0000110305	-0.1226296500	0.0094691500	-0.1208135500	0.0194880150	-0.1178832000	0.0286581850
0.0020475990	-0.0802822800	-0.0099751120	-0.0812329650	-0.0225111400	-0.0835811650	-0.0338744800	-0.0847990350	-0.0436012600	-0.0853490600	-0.0525521300	-0.0851267950	-0.0606729500	-0.0837645850	-0.0680488950	-0.0821157450	-0.0749305450	-0.0802933250	-0.0821877400	-0.0777311950	-0.0895938800	-0.0750633100	-0.0961664550	-0.0708437250	-0.1018596000	-0.0658604550	-0.1070889000	-0.0595693450	-0.1109663000	-0.0526154700	-0.1148465000	-0.0448711700	-0.1184269000	-0.0372422200	-0.1227142500	-0.0291182400	-0.1268599000	-0.0214239400	-0.1301623500	-0.0137014950	-0.1321191500	-0.0055778355	-0.1333313500	0.0027570910	-0.1324524500	0.0107006150	-0.1306451500	0.0187335200	-0.1274184000	0.0265041100
0.0025908430	-0.1015826650	-0.0076193895	-0.1003560250	-0.0191585950	-0.0988168250	-0.0294846550	-0.0951102950	-0.0382417350	-0.0924147850	-0.0471636100	-0.0902039350	-0.0555231550	-0.0874235550	-0.0634112150	-0.0837547400	-0.0706165750	-0.0802600450	-0.0780767250	-0.0758383150	-0.0861914800	-0.0719335850	-0.0935162700	-0.0664816850	-0.1001479900	-0.0608951250	-0.1053891550	-0.0532140400	-0.1113539500	-0.0475975700	-0.1153418500	-0.0403778550	-0.1176359000	-0.0326888850	-0.1216135000	-0.0243447900	-0.1234332000	-0.0155177655	-0.1242133000	-0.0065838604	-0.1258985000	0.0024506975	-0.1268683000	0.0115826515	-0.1253974000	0.0202990500	-0.1233643500	0.0291544650	-0.1207162000	0.0377713900
0.0024249825	-0.0950793150	-0.0086950795	-0.0955786900	-0.0202265750	-0.0949330850	-0.0307383250	-0.0932486150	-0.0395640000	-0.0908737450	-0.0480332800	-0.0889076100	-0.0559920150	-0.0867648350	-0.0632509500	-0.0836686050	-0.0700759350	-0.0814006300	-0.0773322000	-0.0791720200	-0.0841952200	-0.0761150350	-0.0906296750	-0.0716006500	-0.0963503200	-0.0666300050	-0.1028688000	-0.0609227600	-0.1078927500	-0.0546663400	-0.1130237500	-0.0480896800	-0.1171977500	-0.0413686250	-0.1216190500	-0.0341679300	-0.1243361000	-0.0265948500	-0.1254717000	-0.0182707200	-0.1272088500	-0.0099370960	-0.1262744500	-0.0010566609	-0.1251599000	0.0077972010	-0.1232063000	0.0169219000	-0.1199456500	0.0257940100
0.0018047400	-0.0707607300	-0.0090070575	-0.0713587100	-0.0200893200	-0.0745621550	-0.0299437600	-0.0790275750	-0.0384260550	-0.0826680200	-0.0466637200	-0.0835204500	-0.0543359100	-0.0816900100	-0.0614136450	-0.0788288150	-0.0685983800	-0.0773541750	-0.0761900000	-0.0761147250	-0.0839390350	-0.0749671250	-0.0913081900	-0.0736446550	-0.0979066950	-0.0701113050	-0.1047139500	-0.0646127800	-0.1104762000	-0.0583772650	-0.1164767000	-0.0518978300	-0.1211671000	-0.0449384700	-0.1259731500	-0.0372816250	-0.1294969500	-0.0293767350	-0.1315430000	-0.0209505350	-0.1327597000	-0.0122060200	-0.1325607500	-0.0029142875	-0.1312229000	0.0060368000	-0.1300566000	0.0152412550	-0.1281069500	0.0241874800
0.0020837885	-0.0817019600	-0.0100609480	-0.0813365950	-0.0230584250	-0.0810144200	-0.0347600000	-0.0806932350	-0.0446729350	-0.0807159450	-0.0538467100	-0.0809584050	-0.0622878850	-0.0807353450	-0.0699364700	-0.0795525800	-0.0767461900	-0.0775483750	-0.0839415150	-0.0754505500	-0.0909885000	-0.0719377200	-0.0980315450	-0.0682050050	-0.1040969000	-0.0635591000	-0.1099391500	-0.0574441250	-0.1157971000	-0.0520427700	-0.1214081000	-0.0464716250	-0.1254498000	-0.0406570400	-0.1280880000	-0.0332477700	-0.1295455000	-0.0254411250	-0.1305855000	-0.0173806850	-0.1315062000	-0.0093341190	-0.1306304500	-0.0007735255	-0.1296890000	0.0074706795	-0.1276504000	0.0157210400	-0.1249851000	0.0237353700
0.0018902630	-0.0741140900	-0.0097936595	-0.0742239150	-0.0222202700	-0.0737912700	-0.0332822150	-0.0738575600	-0.0425861550	-0.0726401950	-0.0512458550	-0.0721410200	-0.0592079800	-0.0724591100	-0.0668703300	-0.0722786750	-0.0737516650	-0.0724394950	-0.0809707800	-0.0722170900	-0.0882665300	-0.0720317250	-0.0948027700	-0.0704077950	-0.1005422600	-0.0668524150	-0.1066828000	-0.0617437200	-0.1125738500	-0.0565836550	-0.1174852000	-0.0500522200	-0.1226327000	-0.0441605450	-0.1269190500	-0.0370258550	-0.1303085500	-0.0296698500	-0.1321009500	-0.0215230850	-0.1336267000	-0.0131717100	-0.1332118000	-0.0042724755	-0.1333718000	0.0042548225	-0.1315402000	0.0128619800	-0.1297014500	0.0214855500
0.0025639305	-0.1005278800	-0.0070458560	-0.0999117150	-0.0172595500	-0.0977618300	-0.0264648350	-0.0956947750	-0.0342966350	-0.0943392000	-0.0411978950	-0.0909636150	-0.0479583400	-0.0868181100	-0.0549581700	-0.0826606600	-0.0620745450	-0.0793214000	-0.0695766150	-0.0749199800	-0.0774701100	-0.0700062950	-0.0856656700	-0.0652557550	-0.0933383050	-0.0606884400	-0.1003300300	-0.0546131650	-0.1072759000	-0.0489453850	-0.1128288500	-0.0416044850	-0.1180181000	-0.0345704050	-0.1236509000	-0.0273454750	-0.1280096500	-0.0200942250	-0.1299084500	-0.0122065945	-0.1316889000	-0.0042090770	-0.1321538000	0.0042974410	-0.1311181500	0.0125159225	-0.1297990000	0.0210592100	-0.1274961500	0.0292967400
0.0021116520	-0.0827950800	-0.0083305955	-0.0830943150	-0.0198938200	-0.0840802250	-0.0308536050	-0.0833374950	-0.0404042100	-0.0830443500	-0.0494685250	-0.0824710550	-0.0578597900	-0.0811635650	-0.0657355150	-0.0791306250	-0.0728833400	-0.0765353550	-0.0806036150	-0.0736827600	-0.0884639150	-0.0702678550	-0.0958893300	-0.0658744100	-0.1023732500	-0.0607912700	-0.1089893000	-0.0546028050	-0.1152939500	-0.0488568750	-0.1212077500	-0.0430546250	-0.1255945000	-0.0372231050	-0.1288475000	-0.0302224450	-0.1313392500	-0.0230592100	-0.1329479500	-0.0155390300	-0.1338640000	-0.0078295720	-0.1333445000	0.0002733835	-0.1323627000	0.0081838920	-0.1308558500	0.0161981400	-0.1282430000	0.0237622150
0.0018935310	-0.0742427150	-0.0102922185	-0.0741702950	-0.0233147100	-0.0734814300	-0.0351306400	-0.0742070900	-0.0451128000	-0.0754692950	-0.0542247600	-0.0771791350	-0.0625521450	-0.0779475050	-0.0701605350	-0.0774019650	-0.0769742450	-0.0762986400	-0.0840290500	-0.0743341850	-0.0909685650	-0.0713170550	-0.0981017700	-0.0677604500	-0.1045712000	-0.0640438650	-0.1107937000	-0.0585143650	-0.1164131000	-0.0530642150	-0.1211928500	-0.0467803100	-0.1255270000	-0.0407278350	-0.1292178500	-0.0335496850	-0.1317877500	-0.0262355200	-0.1336073500	-0.0184997550	-0.1346801000	-0.0106744100	-0.1348744500	-0.0024835325	-0.1337968000	0.0052997185	-0.1310438500	0.0130098950	-0.1280779000	0.0206882200
0.0022254310	-0.0872561350	-0.0083107755	-0.0875958950	-0.0190329700	-0.0859451700	-0.0284681650	-0.0862345900	-0.0369167450	-0.0865503500	-0.0450734700	-0.0864557900	-0.0528094850	-0.0859482450	-0.0603687800	-0.0856243600	-0.0672106400	-0.0836949450	-0.0745204600	-0.0816299900	-0.0817466450	-0.0789246200	-0.0888628100	-0.0759955650	-0.0939895750	-0.0702506800	-0.1001872050	-0.0639115750	-0.1054583000	-0.0576138800	-0.1099784500	-0.0506594650	-0.1135270500	-0.0434081350	-0.1168482500	-0.0352244850	-0.1193703500	-0.0266754150	-0.1201848500	-0.0174285600	-0.1209597500	-0.0078147670	-0.1216855500	0.0020673655	-0.1207507000	0.0113076960	-0.1193895500	0.0200259200	-0.1180199000	0.0290399000
0.0026901195	-0.1054764450	-0.0056222330	-0.1061330550	-0.0134519050	-0.1048321850	-0.0207964900	-0.1026215200	-0.0269620050	-0.0997250600	-0.0328262650	-0.0974032650	-0.0382138600	-0.0943864500	-0.0439324500	-0.0909725000	-0.0494747850	-0.0878642150	-0.0557410950	-0.0848387050	-0.0616125100	-0.0808783200	-0.0667830200	-0.0761540850	-0.0711232300	-0.0707824750	-0.0754057500	-0.0637046500	-0.0791530000	-0.0571797450	-0.0821835450	-0.0501230600	-0.0833729200	-0.0435618550	-0.0833668000	-0.0352609450	-0.0820016100	-0.0275513500	-0.0815287500	-0.0204140600	-0.0818060500	-0.0116058830	-0.0821453000	-0.0025822625	-0.0809702550	0.0061322755	-0.0790545600	0.0149727685	-0.0776763250	0.0243609800
0.0028288985	-0.1109175500	-0.0062378535	-0.1094378000	-0.0157561250	-0.1069834500	-0.0246583450	-0.1043588000	-0.0323338800	-0.1017405500	-0.0401262850	-0.0988649950	-0.0467413200	-0.0949859400	-0.0536490850	-0.0910819000	-0.0601549900	-0.0872731350	-0.0678473900	-0.0849362250	-0.0749332250	-0.0805942000	-0.0824244850	-0.0756501700	-0.0882191900	-0.0695078100	-0.0931001100	-0.0619591800	-0.0992208550	-0.0559419800	-0.1030117500	-0.0476041400	-0.1077120000	-0.0408596900	-0.1112525500	-0.0321530550	-0.1143017500	-0.0229400750	-0.1168103500	-0.0133716650	-0.1206236000	-0.0046608225	-0.1239072500	0.0038915065	-0.1251609500	0.0117288750	-0.1218177500	0.0196023100	-0.1187616500	0.0282329350
0.0032937825	-0.1291452500	-0.0039676025	-0.1276773000	-0.0125797550	-0.1249106500	-0.0196399750	-0.1199436000	-0.0247834300	-0.1142526000	-0.0309847050	-0.1100561000	-0.0374758950	-0.1058230500	-0.0428169950	-0.1001959000	-0.0488856000	-0.0961571450	-0.0556165550	-0.0919967200	-0.0609434600	-0.0850712350	-0.0675892250	-0.0798387250	-0.0712572250	-0.0725223250	-0.0768462500	-0.0646070800	-0.0825340000	-0.0575470350	-0.0869679900	-0.0487367800	-0.0903946600	-0.0404300000	-0.0924593250	-0.0313866700	-0.0955316100	-0.0224724450	-0.0991818650	-0.0132346800	-0.1028280600	-0.0037985835	-0.1051619000	0.0064697800	-0.1060626000	0.0166527200	-0.1061442500	0.0271478250	-0.1050642000	0.0376950000
0.0018202235	-0.0713688550	-0.0107650300	-0.0714746400	-0.0239521050	-0.0730889250	-0.0358834650	-0.0752778750	-0.0455713100	-0.0786244500	-0.0545482650	-0.0815025000	-0.0626914150	-0.0832733800	-0.0701916900	-0.0830462950	-0.0769716600	-0.0813003800	-0.0843903050	-0.0791481450	-0.0918249250	-0.0760753600	-0.0990349800	-0.0723563550	-0.1055359000	-0.0685468000	-0.1108919500	-0.0624059900	-0.1157561500	-0.0566082450	-0.1205624000	-0.0502192000	-0.1250737500	-0.0441937350	-0.1285687000	-0.0371148300	-0.1303363000	-0.0294270150	-0.1314182000	-0.0212987200	-0.1313097500	-0.0130909850	-0.1310683500	-0.0049049680	-0.1292607500	0.0028261504	-0.1255352500	0.0105019380	-0.1212199000	0.0185871350
0.0017038415	-0.0668057750	-0.0101592400	-0.0674469900	-0.0227277450	-0.0688877400	-0.0335460200	-0.0713477800	-0.0418607300	-0.0753906050	-0.0491111550	-0.0783259800	-0.0564930100	-0.0767215550	-0.0639435350	-0.0764173150	-0.0705344300	-0.0769362750	-0.0763958050	-0.0754048750	-0.0827938100	-0.0721867600	-0.0900739800	-0.0695994850	-0.0973004100	-0.0673562100	-0.1043242500	-0.0626586700	-0.1106746500	-0.0576692400	-0.1159452000	-0.0512537000	-0.1202282500	-0.0444604900	-0.1243647000	-0.0365423800	-0.1278048500	-0.0284937900	-0.1319525500	-0.0209196700	-0.1358686000	-0.0135097000	-0.1369196500	-0.0052227060	-0.1355570000	0.0030817770	-0.1349010000	0.0118616450	-0.1330264500	0.0205001800
0.0018410930	-0.0721873700	-0.0083878365	-0.0731912100	-0.0192145200	-0.0753566750	-0.0283595500	-0.0791397150	-0.0353264050	-0.0836778050	-0.0426927650	-0.0859977350	-0.0504902300	-0.0866850800	-0.0579020700	-0.0862465950	-0.0649049200	-0.0850982400	-0.0723613800	-0.0827515250	-0.0797867850	-0.0790830200	-0.0864192900	-0.0733879600	-0.0935812650	-0.0683516450	-0.1013589500	-0.0625219100	-0.1090741500	-0.0577988200	-0.1161889000	-0.0527290950	-0.1213032000	-0.0468491150	-0.1251922000	-0.0393339000	-0.1289321500	-0.0319307400	-0.1319822500	-0.0244676900	-0.1321888000	-0.0165262300	-0.1315607500	-0.0080268825	-0.1293787500	0.0005241176	-0.1259266500	0.0094815070	-0.1217913500	0.0185223650
0.0019772220	-0.0775250300	-0.0090462535	-0.0794306850	-0.0210043750	-0.0798009100	-0.0319996700	-0.0794088350	-0.0413735950	-0.0783430350	-0.0500828850	-0.0765694200	-0.0585989850	-0.0752142050	-0.0667560550	-0.0744529400	-0.0740230050	-0.0733724900	-0.0816708250	-0.0717539000	-0.0890096800	-0.0681676250	-0.0963514250	-0.0645683250	-0.1023080950	-0.0596664650	-0.1089654500	-0.0545931700	-0.1154081000	-0.0506447250	-0.1205861000	-0.0461237750	-0.1232640000	-0.0407788100	-0.1269401000	-0.0341934500	-0.1307204000	-0.0275718650	-0.1334831500	-0.0203600000	-0.1357037500	-0.0133378750	-0.1348949000	-0.0056464800	-0.1330873500	0.0022000625	-0.1315178000	0.0105688650	-0.1291024000	0.0188052400
0.0015394350	-0.0603599150	-0.0094708255	-0.0619621150	-0.0207525350	-0.0662829200	-0.0315662600	-0.0701068050	-0.0407844850	-0.0731074800	-0.0496508000	-0.0745868950	-0.0579357800	-0.0747815150	-0.0656074650	-0.0758526650	-0.0722774450	-0.0771825050	-0.0790613900	-0.0759115550	-0.0856962200	-0.0733753000	-0.0920857350	-0.0692752000	-0.0980685650	-0.0644175600	-0.1052583000	-0.0599312050	-0.1117391500	-0.0547647350	-0.1184099500	-0.0497732050	-0.1235873000	-0.0436937500	-0.1274540500	-0.0355552350	-0.1307063500	-0.0273417000	-0.1345535000	-0.0195022650	-0.1374682000	-0.0116519150	-0.1388722500	-0.0034431670	-0.1377535500	0.0047562970	-0.1361582500	0.0133374350	-0.1325815000	0.0214030600
0.0021652865	-0.0848990500	-0.0082737340	-0.0869168950	-0.0191861800	-0.0900070000	-0.0285909650	-0.0928622300	-0.0364351050	-0.0921998500	-0.0442804400	-0.0913957550	-0.0517249850	-0.0885043050	-0.0585017150	-0.0841769000	-0.0647624500	-0.0803694300	-0.0716883700	-0.0773627250	-0.0784153900	-0.0738378050	-0.0855126250	-0.0696412300	-0.0909129100	-0.0641950800	-0.0968687150	-0.0575121000	-0.1030680000	-0.0512598500	-0.1074839000	-0.0431255850	-0.1117969500	-0.0356874550	-0.1178974500	-0.0282120250	-0.1234364500	-0.0207350750	-0.1278533000	-0.0130308650	-0.1321522500	-0.0056291605	-0.1329028500	0.0030474000	-0.1320910500	0.0118364750	-0.1315368500	0.0209968000	-0.1284527000	0.0296137950
0.0032300115	-0.1266463500	-0.0056707100	-0.1255673500	-0.0148917700	-0.1228139500	-0.0236251950	-0.1198380000	-0.0310565650	-0.1171993500	-0.0378156950	-0.1139643000	-0.0439799850	-0.1102530500	-0.0495427300	-0.1066125500	-0.0534571000	-0.1025418000	-0.0580785800	-0.0983334550	-0.0615786800	-0.0927208750	-0.0647144550	-0.0857625900	-0.0657366600	-0.0773291850	-0.0679199450	-0.0673738450	-0.0696686450	-0.0577143700	-0.0724403950	-0.0473801200	-0.0735442350	-0.0371517900	-0.0778103050	-0.0265498350	-0.0807833100	-0.0156089100	-0.0852796900	-0.0053955670	-0.0912860900	0.0040487245	-0.0958585000	0.0139044950	-0.1002776100	0.0226979150	-0.1033241650	0.0312671900	-0.1036870000	0.0401468600
0.0026287645	-0.1030719500	-0.0065034510	-0.1034149000	-0.0160870850	-0.1044071500	-0.0245335900	-0.1057071500	-0.0315560350	-0.1046337500	-0.0380299500	-0.1015212000	-0.0443902700	-0.0978777950	-0.0498253950	-0.0928428600	-0.0547553000	-0.0876496300	-0.0606148200	-0.0822844700	-0.0676961350	-0.0769791750	-0.0754141500	-0.0715915400	-0.0828045100	-0.0659144150	-0.0909436250	-0.0596797150	-0.0988931800	-0.0542205200	-0.1052790000	-0.0471076650	-0.1100260500	-0.0393960100	-0.1152022500	-0.0310223000	-0.1202725500	-0.0232997050	-0.1232587500	-0.0147724750	-0.1244732000	-0.0057677655	-0.1265254500	0.0032713595	-0.1262432500	0.0118903300	-0.1251776000	0.0205762200	-0.1217456500	0.0290757000
0.0021016665	-0.0824048100	-0.0086721025	-0.0831334400	-0.0198775550	-0.0849306950	-0.0297052250	-0.0877496650	-0.0378807050	-0.0906823500	-0.0456511650	-0.0921720750	-0.0527410500	-0.0923306200	-0.0592421900	-0.0900066150	-0.0655102300	-0.0875103950	-0.0724035200	-0.0844329200	-0.0794969650	-0.0804013800	-0.0866484350	-0.0757612750	-0.0932210400	-0.0703303200	-0.1006793050	-0.0642371850	-0.1068801000	-0.0576866000	-0.1125241000	-0.0502288550	-0.1175620000	-0.0431742850	-0.1206716500	-0.0343729850	-0.1234870500	-0.0258454600	-0.1257344000	-0.0168285950	-0.1276990500	-0.0077637310	-0.1277158500	0.0018563805	-0.1273884500	0.0110261700	-0.1265031000	0.0202826150	-0.1241225500	0.0292290900
0.0027425825	-0.1075349000	-0.0068030530	-0.1092948500	-0.0170457750	-0.1101443000	-0.0258911600	-0.1113982000	-0.0333611700	-0.1109171000	-0.0401042900	-0.1089949500	-0.0457998200	-0.1052196000	-0.0520078700	-0.1022002000	-0.0573367950	-0.0986131450	-0.0629522750	-0.0946739300	-0.0682843550	-0.0888157050	-0.0727573300	-0.0814119850	-0.0765187700	-0.0730508950	-0.0803174450	-0.0632269200	-0.0846764600	-0.0547271150	-0.0873343550	-0.0451430400	-0.0910971850	-0.0369826750	-0.0966468700	-0.0288955750	-0.1021332500	-0.0206056400	-0.1079270000	-0.0128270800	-0.1112329500	-0.0035305665	-0.1134556000	0.0065406940	-0.1137817500	0.0162407650	-0.1145386000	0.0261991750	-0.1135444500	0.0361119700
0.0021744015	-0.0852570900	-0.0086328765	-0.0851437900	-0.0202893900	-0.0842501300	-0.0307867100	-0.0814093600	-0.0399807050	-0.0802040550	-0.0487838600	-0.0796948600	-0.0570442700	-0.0793480250	-0.0647360600	-0.0771829150	-0.0719189950	-0.0753843300	-0.0797576750	-0.0741806100	-0.0876243050	-0.0725219400	-0.0948536900	-0.0690105050	-0.1012865500	-0.0645914400	-0.1080589500	-0.0590121800	-0.1146779000	-0.0541909550	-0.1200098500	-0.0483211450	-0.1241296000	-0.0418471100	-0.1276300500	-0.0340015900	-0.1305309000	-0.0261009150	-0.1324419500	-0.0178395200	-0.1328493500	-0.0092241335	-0.1336192500	-0.0003000247	-0.1326941000	0.0082286815	-0.1320253500	0.0168179100	-0.1288677000	0.0245827350
0.0017621420	-0.0690926550	-0.0103213100	-0.0700094650	-0.0230583050	-0.0706492000	-0.0343286700	-0.0730784700	-0.0437400100	-0.0760914000	-0.0526907500	-0.0780537450	-0.0609377200	-0.0792526900	-0.0685657050	-0.0796992250	-0.0754280200	-0.0796026050	-0.0824936150	-0.0782208050	-0.0893876950	-0.0756292300	-0.0961445400	-0.0720931650	-0.1022100000	-0.0677698100	-0.1085651500	-0.0626456700	-0.1135514000	-0.0571174750	-0.1171197000	-0.0500304450	-0.1209181000	-0.0435636550	-0.1246583000	-0.0363103550	-0.1280231000	-0.0293585050	-0.1307712500	-0.0221037650	-0.1314393500	-0.0142578650	-0.1313494500	-0.0057818730	-0.1312054000	0.0024583245	-0.1303394500	0.0108468350	-0.1277814500	0.0189611850
0.0016277785	-0.0638244000	-0.0103230200	-0.0642278450	-0.0227358650	-0.0676676150	-0.0341224850	-0.0700507050	-0.0434186300	-0.0733812900	-0.0518394050	-0.0764944600	-0.0594872000	-0.0780956250	-0.0666961650	-0.0772611350	-0.0733933400	-0.0766836100	-0.0801867000	-0.0742765950	-0.0870854250	-0.0711714700	-0.0937824800	-0.0672388500	-0.0997427000	-0.0629895100	-0.1057034000	-0.0573590200	-0.1113573500	-0.0519925700	-0.1171942000	-0.0466930800	-0.1214035000	-0.0406421050	-0.1252110500	-0.0335958200	-0.1295824500	-0.0275466550	-0.1330247500	-0.0208569100	-0.1351707000	-0.0137362550	-0.1351708000	-0.0057816205	-0.1348691000	0.0020561270	-0.1337100000	0.0100822745	-0.1312857000	0.0178738100
0.0028857265	-0.1131480000	-0.0061018180	-0.1123708500	-0.0155146900	-0.1095751500	-0.0242639900	-0.1062391500	-0.0317597550	-0.1032961500	-0.0387811700	-0.1004314250	-0.0452517950	-0.0968899400	-0.0507144300	-0.0919612350	-0.0556659650	-0.0866971950	-0.0604856100	-0.0798511650	-0.0658726950	-0.0724690050	-0.0718493250	-0.0651128600	-0.0772319750	-0.0575494550	-0.0849893250	-0.0508610650	-0.0934441550	-0.0461411500	-0.1017205500	-0.0415759550	-0.1087670500	-0.0371217050	-0.1149316000	-0.0315066200	-0.1180953500	-0.0239633250	-0.1213170000	-0.0160014350	-0.1240672500	-0.0074642890	-0.1258357000	0.0015624920	-0.1255658500	0.0105246365	-0.1252124500	0.0198446100	-0.1248517500	0.0289989600
0.0016445900	-0.0644837050	-0.0093075400	-0.0662920850	-0.0213748900	-0.0683461300	-0.0320603050	-0.0708471500	-0.0409910800	-0.0739750050	-0.0493455450	-0.0766208450	-0.0573905650	-0.0769357850	-0.0650646000	-0.0774084800	-0.0720167200	-0.0779655700	-0.0793689050	-0.0771752150	-0.0870219950	-0.0757908100	-0.0942642600	-0.0728197350	-0.1009510550	-0.0690404000	-0.1081763000	-0.0645938850	-0.1144201000	-0.0598147450	-0.1193849000	-0.0538564300	-0.1236935000	-0.0478145050	-0.1270781000	-0.0405781250	-0.1290580500	-0.0326691300	-0.1309150000	-0.0243424050	-0.1316579500	-0.0156907600	-0.1317939500	-0.0064120290	-0.1309217500	0.0025775100	-0.1285659500	0.0116756400	-0.1257502000	0.0207114050
0.0014913995	-0.0584772950	-0.0108188500	-0.0589555950	-0.0235150850	-0.0594673300	-0.0345588000	-0.0623747250	-0.0435799550	-0.0662937600	-0.0513164500	-0.0702496500	-0.0577748450	-0.0743341250	-0.0638756400	-0.0766098200	-0.0698044750	-0.0763776150	-0.0765386150	-0.0750943200	-0.0837128250	-0.0733684750	-0.0909674000	-0.0713750150	-0.0969515400	-0.0671718550	-0.1033228000	-0.0622796700	-0.1099743500	-0.0591588850	-0.1160757500	-0.0553505350	-0.1206418000	-0.0502197100	-0.1253480500	-0.0439528950	-0.1284349500	-0.0368689050	-0.1303134000	-0.0289425600	-0.1322583500	-0.0208574750	-0.1323363500	-0.0119168200	-0.1313449500	-0.0030321255	-0.1302652000	0.0060758230	-0.1274548000	0.0148741300
0.0025812955	-0.1012119300	-0.0070815465	-0.1027580100	-0.0171352150	-0.1018781750	-0.0260477600	-0.1014455400	-0.0336165150	-0.1000080100	-0.0410921500	-0.0982817900	-0.0480858900	-0.0951412650	-0.0550841600	-0.0923110900	-0.0616308350	-0.0894729100	-0.0688069800	-0.0866507450	-0.0754514700	-0.0823351600	-0.0812963700	-0.0770693300	-0.0864576400	-0.0704920950	-0.0927398600	-0.0630310150	-0.0981089200	-0.0555795400	-0.1027815450	-0.0474014350	-0.1059740000	-0.0391512100	-0.1092398500	-0.0300991050	-0.1128526500	-0.0211902500	-0.1152764000	-0.0117225975	-0.1168631500	-0.0024298015	-0.1159891500	0.0073008765	-0.1148376500	0.0168077350	-0.1132143000	0.0263047750	-0.1123489500	0.0355296550
0.0026963820	-0.1057243500	-0.0087224860	-0.1055934500	-0.0206080100	-0.1045724000	-0.0314192350	-0.1039836000	-0.0403773100	-0.1038914500	-0.0485380800	-0.1033812500	-0.0556516350	-0.1025724500	-0.0615182700	-0.1005909100	-0.0668535300	-0.0989793750	-0.0722263200	-0.0962043300	-0.0775615350	-0.0920506700	-0.0822972850	-0.0866243750	-0.0871005800	-0.0807771750	-0.0911678050	-0.0728978250	-0.0940046900	-0.0648341750	-0.0971877300	-0.0558398600	-0.1000287300	-0.0469601150	-0.1030531500	-0.0369302800	-0.1043555350	-0.0264913250	-0.1051416000	-0.0155954850	-0.1060559000	-0.0047084200	-0.1065516500	0.0063789535	-0.1060996500	0.0170341150	-0.1047425500	0.0277087600	-0.1034097200	0.0380041750
0.0027315555	-0.1071035500	-0.0066091015	-0.1079568500	-0.0163182300	-0.1087418500	-0.0249397150	-0.1086255000	-0.0322880650	-0.1078600500	-0.0390379400	-0.1054584000	-0.0459540650	-0.1038341500	-0.0521109500	-0.1004779200	-0.0576334300	-0.0966581800	-0.0639524700	-0.0926412000	-0.0695815300	-0.0867662800	-0.0741535650	-0.0791230450	-0.0796281750	-0.0716730250	-0.0863607350	-0.0637014750	-0.0917968700	-0.0558392350	-0.0959298950	-0.0469483900	-0.0999738400	-0.0382922600	-0.1044944000	-0.0289377400	-0.1078144500	-0.0195420700	-0.1099007000	-0.0092636280	-0.1112762000	0.0011188415	-0.1132765500	0.0115243950	-0.1130884000	0.0212709700	-0.1123680500	0.0309439950	-0.1122457000	0.0402681600
0.0015581130	-0.0610933550	-0.0094043505	-0.0625806900	-0.0211753800	-0.0650193200	-0.0316903250	-0.0675345950	-0.0406346550	-0.0707115350	-0.0490936450	-0.0726085900	-0.0570113200	-0.0736186400	-0.0641918400	-0.0752378400	-0.0707169500	-0.0765597550	-0.0778378800	-0.0765309500	-0.0852883400	-0.0749002400	-0.0926597350	-0.0721159200	-0.0995929150	-0.0684865700	-0.1070994000	-0.0638104000	-0.1138796000	-0.0589417400	-0.1199867500	-0.0532497350	-0.1249064500	-0.0473543200	-0.1288661500	-0.0401962300	-0.1321119000	-0.0329432300	-0.1346534500	-0.0253770100	-0.1356987000	-0.0174891500	-0.1345924000	-0.0089299490	-0.1319782000	-0.0004345030	-0.1288838500	0.0086103080	-0.1257722000	0.0178998100
0.0014194015	-0.0556545550	-0.0105858900	-0.0570002200	-0.0232290550	-0.0586408250	-0.0344546150	-0.0613400300	-0.0437865300	-0.0654708450	-0.0528835600	-0.0685317000	-0.0611530750	-0.0713332250	-0.0685427450	-0.0740630600	-0.0754862550	-0.0751253250	-0.0829179900	-0.0750230800	-0.0903215450	-0.0747319000	-0.0974197700	-0.0731127600	-0.1039126500	-0.0710003800	-0.1101717500	-0.0669325400	-0.1163431500	-0.0636045550	-0.1209076000	-0.0583223850	-0.1244806000	-0.0527568900	-0.1269376500	-0.0455806950	-0.1290603500	-0.0380784250	-0.1302093500	-0.0298815750	-0.1304884500	-0.0212198050	-0.1307826500	-0.0118760050	-0.1294269000	-0.0028259575	-0.1268260500	0.0065312540	-0.1242145500	0.0160716150
0.0014799870	-0.0580301600	-0.0115309650	-0.0582294550	-0.0252687350	-0.0598205450	-0.0376693000	-0.0604414350	-0.0479496850	-0.0621148450	-0.0575134800	-0.0629361450	-0.0661689750	-0.0641788650	-0.0739136250	-0.0658752350	-0.0810566900	-0.0673712900	-0.0885133050	-0.0685705400	-0.0956137800	-0.0698294950	-0.1022938000	-0.0696298300	-0.1078224500	-0.0672765850	-0.1134227000	-0.0639173400	-0.1187155500	-0.0603165350	-0.1226400500	-0.0553110350	-0.1260270500	-0.0501059400	-0.1276330000	-0.0432877650	-0.1293320500	-0.0361861050	-0.1306578500	-0.0284989800	-0.1306744000	-0.0203620050	-0.1313692000	-0.0116209500	-0.1302028500	-0.0030877325	-0.1284619000	0.0058251910	-0.1262742000	0.0146678750
0.0023003635	-0.0901971650	-0.0096478455	-0.0893421100	-0.0223006050	-0.0886051250	-0.0338891700	-0.0875172350	-0.0439008250	-0.0876939200	-0.0533140250	-0.0884659950	-0.0615005250	-0.0870655300	-0.0690503050	-0.0843233200	-0.0754936850	-0.0805775800	-0.0834227300	-0.0775836450	-0.0910730500	-0.0724416900	-0.0992191700	-0.0687543950	-0.1063149500	-0.0642893800	-0.1110625500	-0.0563579350	-0.1159343000	-0.0492260300	-0.1193174000	-0.0415196500	-0.1248887000	-0.0360059750	-0.1280344500	-0.0283246450	-0.1307255000	-0.0211494550	-0.1324882000	-0.0139274750	-0.1322760000	-0.0063651510	-0.1308073500	0.0014301410	-0.1285761500	0.0088312845	-0.1238493500	0.0159413100	-0.1195730000	0.0235804000
0.0031348970	-0.1229190500	-0.0053339150	-0.1215376500	-0.0143267900	-0.1222637000	-0.0223612000	-0.1209413000	-0.0285975750	-0.1201918000	-0.0335684500	-0.1206595000	-0.0371041700	-0.1177348500	-0.0411104600	-0.1147901500	-0.0431960900	-0.1102765500	-0.0450117700	-0.1044559500	-0.0488591550	-0.0980309050	-0.0537515350	-0.0913054850	-0.0568351450	-0.0824908500	-0.0610070000	-0.0726835500	-0.0657625150	-0.0635839550	-0.0689222600	-0.0526158100	-0.0719086300	-0.0417427250	-0.0749776850	-0.0298329650	-0.0780178750	-0.0185693800	-0.0795462450	-0.0069816405	-0.0838742750	0.0036437415	-0.0859808500	0.0147144350	-0.0885770450	0.0245585600	-0.0911067350	0.0343391700	-0.0903472100	0.0434147000
0.0031387390	-0.1230697000	-0.0035782240	-0.1222312500	-0.0105973500	-0.1213041500	-0.0170565000	-0.1215980500	-0.0229428300	-0.1193650000	-0.0286970400	-0.1158047500	-0.0343571750	-0.1117549000	-0.0386966600	-0.1067760000	-0.0424029600	-0.1020278500	-0.0456997900	-0.0959789600	-0.0497363250	-0.0888018000	-0.0525792550	-0.0801617050	-0.0561328300	-0.0711134750	-0.0618183450	-0.0618637450	-0.0675231700	-0.0536872850	-0.0723655950	-0.0444543800	-0.0781967300	-0.0364762650	-0.0840538950	-0.0270919650	-0.0903966900	-0.0182818750	-0.0951880050	-0.0085292720	-0.1001273250	0.0010788144	-0.1043983000	0.0108511990	-0.1061509500	0.0201338250	-0.1074460000	0.0295954000	-0.1081468500	0.0387899200
0.0022867130	-0.0896620000	-0.0094479925	-0.0896973850	-0.0217044000	-0.0890804600	-0.0326832450	-0.0857742900	-0.0421574150	-0.0833918850	-0.0513703450	-0.0821396400	-0.0600209350	-0.0821934500	-0.0678472150	-0.0806791450	-0.0747502250	-0.0789335650	-0.0817503600	-0.0767005500	-0.0879995200	-0.0722638400	-0.0950183850	-0.0683665700	-0.1016506950	-0.0640874100	-0.1090729000	-0.0602977150	-0.1157798500	-0.0562944600	-0.1207273000	-0.0505062950	-0.1239445500	-0.0443400950	-0.1266285000	-0.0368896350	-0.1282300000	-0.0291373850	-0.1284435000	-0.0208368900	-0.1282467500	-0.0122864500	-0.1272817000	-0.0029271890	-0.1264104500	0.0059766265	-0.1227559500	0.0146962950	-0.1189179500	0.0236209350
0.0017486970	-0.0685664450	-0.0100197800	-0.0698653950	-0.0224449600	-0.0727236150	-0.0334287300	-0.0767733650	-0.0429926100	-0.0798471750	-0.0520491150	-0.0815188100	-0.0606257850	-0.0811735050	-0.0687532500	-0.0799630250	-0.0762319550	-0.0788701450	-0.0837879050	-0.0772622200	-0.0913207150	-0.0758162800	-0.0982127600	-0.0734922250	-0.1036168500	-0.0689743250	-0.1088513000	-0.0633739600	-0.1139297500	-0.0586831200	-0.1180183500	-0.0521561650	-0.1210411000	-0.0450296000	-0.1248350000	-0.0370573600	-0.1278132000	-0.0289777100	-0.1299282500	-0.0206563350	-0.1321630000	-0.0124856250	-0.1313268500	-0.0036944380	-0.1295106000	0.0049823950	-0.1275666000	0.0141185550	-0.1248377500	0.0231159200
0.0027633545	-0.1083512000	-0.0055298450	-0.1060562500	-0.0143882600	-0.1017672000	-0.0226802950	-0.0977287200	-0.0304420850	-0.0964640150	-0.0381605850	-0.0959404950	-0.0454207900	-0.0948548600	-0.0523320900	-0.0927395450	-0.0590643500	-0.0914957050	-0.0662432750	-0.0895598050	-0.0732607800	-0.0864708200	-0.0799152850	-0.0835380400	-0.0849616150	-0.0788630050	-0.0888231600	-0.0712934300	-0.0926097250	-0.0637773850	-0.0956390550	-0.0549691400	-0.0989706350	-0.0465640850	-0.1032305500	-0.0376917550	-0.1048863000	-0.0279364000	-0.1084270000	-0.0184240550	-0.1106359000	-0.0083859330	-0.1116813000	0.0021983310	-0.1118583000	0.0122524750	-0.1114642500	0.0226154600	-0.1110799000	0.0325514800
0.0020192600	-0.0791753750	-0.0100601685	-0.0789445050	-0.0229253600	-0.0783637600	-0.0346626350	-0.0773372350	-0.0446652500	-0.0769875750	-0.0539999900	-0.0760452700	-0.0626931300	-0.0751312500	-0.0707931750	-0.0733884600	-0.0782229700	-0.0722019800	-0.0859753450	-0.0702634000	-0.0938528450	-0.0684071450	-0.1013189000	-0.0655844850	-0.1075956500	-0.0617696500	-0.1130745500	-0.0565658500	-0.1179731500	-0.0511165550	-0.1213267000	-0.0443336950	-0.1236182500	-0.0371335900	-0.1267972500	-0.0292791500	-0.1296092000	-0.0214324300	-0.1311399000	-0.0131451500	-0.1329445500	-0.0050025871	-0.1334110500	0.0034583397	-0.1331227500	0.0114194770	-0.1306554000	0.0192360850	-0.1279119500	0.0270416900
0.0019717110	-0.0773108950	-0.0107964300	-0.0782073300	-0.0243501600	-0.0792203400	-0.0366202350	-0.0788477550	-0.0469198750	-0.0800774000	-0.0564489850	-0.0814852350	-0.0652910050	-0.0818988100	-0.0733325750	-0.0817545550	-0.0806018550	-0.0808465850	-0.0881957500	-0.0793746750	-0.0957413400	-0.0774915550	-0.1025835500	-0.0740982650	-0.1086060500	-0.0700473000	-0.1143203500	-0.0645888200	-0.1195474000	-0.0598328450	-0.1227883000	-0.0532057600	-0.1252060000	-0.0462978200	-0.1275857000	-0.0383115400	-0.1280060000	-0.0299078300	-0.1280383000	-0.0210597500	-0.1292391500	-0.0121909100	-0.1276631500	-0.0028508685	-0.1246448500	0.0062764195	-0.1209310000	0.0157304700	-0.1169055000	0.0252422400
0.0015094585	-0.0591860150	-0.0112940500	-0.0603431500	-0.0249612100	-0.0620966900	-0.0367578000	-0.0649611350	-0.0463547200	-0.0697753650	-0.0555227900	-0.0736980000	-0.0638468200	-0.0768420850	-0.0715380050	-0.0788151450	-0.0781079550	-0.0809011750	-0.0848763750	-0.0816670550	-0.0913760950	-0.0799435400	-0.0973441250	-0.0768842450	-0.1023003000	-0.0719631850	-0.1080569000	-0.0665155600	-0.1138629000	-0.0615978900	-0.1189719000	-0.0557779450	-0.1223991500	-0.0493183950	-0.1254020500	-0.0417939450	-0.1271705500	-0.0337443250	-0.1300777500	-0.0254317600	-0.1316870500	-0.0165232900	-0.1310954000	-0.0067274245	-0.1305381000	0.0028304740	-0.1272624000	0.0122796900	-0.1237975000	0.0219038100
0.0016997710	-0.0666482700	-0.0092508745	-0.0695273100	-0.0215472550	-0.0715825700	-0.0324770600	-0.0737354400	-0.0414492550	-0.0760961600	-0.0498079250	-0.0755220100	-0.0579453200	-0.0754293150	-0.0655197800	-0.0766750300	-0.0724632500	-0.0790427150	-0.0797583850	-0.0807764100	-0.0867083400	-0.0802546050	-0.0931177750	-0.0774393100	-0.0998133000	-0.0756739250	-0.1064309500	-0.0715656050	-0.1126122000	-0.0678426450	-0.1166404500	-0.0617655150	-0.1191361000	-0.0548948500	-0.1211081500	-0.0469823150	-0.1225637000	-0.0385376550	-0.1237769500	-0.0294848850	-0.1233133000	-0.0200784750	-0.1212373000	-0.0098366830	-0.1187004000	0.0002454500	-0.1157413000	0.0106906320	-0.1133973000	0.0211402550
0.0035621700	-0.1279533500	-0.0022560320	-0.1256891000	-0.0093461605	-0.1225080500	-0.0169122750	-0.1193618000	-0.0230784700	-0.1162432000	-0.0281151250	-0.1122924500	-0.0347086100	-0.1077437500	-0.0412592200	-0.1011030500	-0.0490616750	-0.0952982200	-0.0551432900	-0.0880195950	-0.0623384800	-0.0821930400	-0.0689207050	-0.0766992650	-0.0743893300	-0.0706441800	-0.0804351950	-0.0651770450	-0.0862876650	-0.0599118550	-0.0917371850	-0.0545752350	-0.0951548150	-0.0468635950	-0.0958489000	-0.0376243700	-0.0971094200	-0.0273145100	-0.0997476950	-0.0168239700	-0.0993848350	-0.0059577695	-0.0989143400	0.0048962835	-0.0975306250	0.0153041850	-0.0964661850	0.0258202800	-0.0945420350	0.0362002900
0.0023676925	-0.0850477650	-0.0065867625	-0.0856857450	-0.0161963900	-0.0872478700	-0.0255127800	-0.0910072950	-0.0336420500	-0.0915056600	-0.0402545050	-0.0924542750	-0.0479613100	-0.0926714700	-0.0556412900	-0.0921994250	-0.0631765700	-0.0901510600	-0.0704461550	-0.0873872850	-0.0769336100	-0.0837379800	-0.0813170600	-0.0783669450	-0.0855642700	-0.0732755900	-0.0895830500	-0.0667606750	-0.0938565250	-0.0595665000	-0.0980488450	-0.0523094550	-0.1030554000	-0.0438273100	-0.1072530000	-0.0347448250	-0.1119894500	-0.0254805850	-0.1132994000	-0.0150451350	-0.1162020500	-0.0043587595	-0.1168524000	0.0063928150	-0.1195512000	0.0163239350	-0.1202368000	0.0260723250	-0.1211556500	0.0350978700
0.0026069975	-0.0936437650	-0.0053255850	-0.0945978200	-0.0140492400	-0.0971657950	-0.0230374000	-0.0982735050	-0.0303317650	-0.0980437400	-0.0358330350	-0.0962669150	-0.0424019500	-0.0924955850	-0.0504816500	-0.0893023050	-0.0592421900	-0.0865057400	-0.0675804900	-0.0825400050	-0.0755019400	-0.0786974900	-0.0823985900	-0.0743038150	-0.0891675300	-0.0706497350	-0.0951234000	-0.0648134600	-0.1009983150	-0.0584863000	-0.1043946500	-0.0513602850	-0.1072195500	-0.0429796200	-0.1117875500	-0.0344251450	-0.1181267000	-0.0258835650	-0.1241116000	-0.0172991900	-0.1270591000	-0.0075429470	-0.1281876000	0.0021753350	-0.1279591500	0.0114711810	-0.1256473000	0.0203742050	-0.1204507500	0.0284996150
0.0023161925	-0.0831981050	-0.0059857480	-0.0845606700	-0.0154987700	-0.0857259800	-0.0251119950	-0.0858506700	-0.0331994800	-0.0851113900	-0.0402119600	-0.0837797800	-0.0483014750	-0.0825371000	-0.0568564650	-0.0806538950	-0.0648054900	-0.0775136950	-0.0718331800	-0.0733113650	-0.0783292100	-0.0692131500	-0.0851518550	-0.0669111450	-0.0917597550	-0.0644016000	-0.0980156350	-0.0609193750	-0.1041880000	-0.0563461050	-0.1098846500	-0.0517893550	-0.1152060500	-0.0458977050	-0.1201670000	-0.0393524000	-0.1250401500	-0.0325231600	-0.1278891000	-0.0250691850	-0.1287416000	-0.0169903450	-0.1286287500	-0.0082027295	-0.1279256500	0.0008751112	-0.1267930500	0.0103601600	-0.1250140500	0.0198740650
0.0016808470	-0.0603764950	-0.0090497875	-0.0618511150	-0.0207696100	-0.0648017950	-0.0325143850	-0.0676409300	-0.0417168950	-0.0707640600	-0.0495433000	-0.0714266700	-0.0585738150	-0.0719322200	-0.0682589400	-0.0733346200	-0.0775079050	-0.0748216700	-0.0859241900	-0.0748599700	-0.0933439700	-0.0722919550	-0.1002667500	-0.0696287450	-0.1069134500	-0.0675062000	-0.1135348500	-0.0661300950	-0.1191602000	-0.0633136300	-0.1230187000	-0.0587589250	-0.1250708500	-0.0521037000	-0.1273646000	-0.0446908450	-0.1308494000	-0.0367486350	-0.1330699500	-0.0280183750	-0.1328581000	-0.0184797250	-0.1314089500	-0.0088058680	-0.1298121500	0.0009290367	-0.1271705000	0.0106722075	-0.1234089000	0.0200862900
0.0018488845	-0.0664124100	-0.0096826450	-0.0682985550	-0.0222997100	-0.0703117500	-0.0342089450	-0.0740136350	-0.0431919450	-0.0782599400	-0.0504202000	-0.0808107450	-0.0586054400	-0.0812809550	-0.0672490900	-0.0791517250	-0.0755890550	-0.0766580900	-0.0826563000	-0.0728481050	-0.0896459300	-0.0698917100	-0.0963289050	-0.0687219350	-0.1017593000	-0.0662174750	-0.1064043500	-0.0622650500	-0.1104172500	-0.0575049000	-0.1145392000	-0.0525610000	-0.1191148000	-0.0463216250	-0.1247815000	-0.0403406350	-0.1281812000	-0.0328483050	-0.1291503500	-0.0240366400	-0.1301867000	-0.0151390900	-0.1282197000	-0.0063880050	-0.1248778000	0.0017481030	-0.1230629000	0.0106720050	-0.1212995000	0.0196299650
0.0035085335	-0.1260276000	-0.0021875470	-0.1241932000	-0.0083175555	-0.1203805000	-0.0147353150	-0.1166278500	-0.0192975300	-0.1128226500	-0.0228991550	-0.1092453500	-0.0291217650	-0.1055546000	-0.0365671250	-0.1009862500	-0.0447745600	-0.0966239000	-0.0526431300	-0.0916101500	-0.0606426800	-0.0875395700	-0.0666873600	-0.0823721800	-0.0717089700	-0.0770620550	-0.0764200050	-0.0712720550	-0.0808598050	-0.0646974650	-0.0850650900	-0.0577864200	-0.0891916150	-0.0502656850	-0.0915392200	-0.0415849650	-0.0930957650	-0.0315630700	-0.0943382050	-0.0209279550	-0.0946069700	-0.0099037210	-0.0937942800	0.0009538907	-0.0923607000	0.0121075050	-0.0900359100	0.0232010400	-0.0875080850	0.0341243750
0.0022783865	-0.0818401150	-0.0079160160	-0.0825763050	-0.0182913650	-0.0856644450	-0.0287055200	-0.0887614800	-0.0367271550	-0.0923499900	-0.0432354850	-0.0945418400	-0.0503690600	-0.0951226200	-0.0580933000	-0.0938880350	-0.0657050200	-0.0924352150	-0.0727881350	-0.0900655900	-0.0795448100	-0.0875142450	-0.0853876500	-0.0846077600	-0.0898611950	-0.0806469800	-0.0933145500	-0.0747133750	-0.0967170400	-0.0675010000	-0.0997694600	-0.0594778600	-0.1029360000	-0.0498806150	-0.1068826500	-0.0398416700	-0.1100812000	-0.0286828750	-0.1128152000	-0.0169802250	-0.1151451500	-0.0049714635	-0.1163611000	0.0066413620	-0.1185163000	0.0173719000	-0.1192284000	0.0274569150	-0.1178112500	0.0366942650
0.0034767490	-0.1248860500	-0.0030739247	-0.1233779000	-0.0102248790	-0.1195539500	-0.0180726250	-0.1156876500	-0.0246631300	-0.1125016000	-0.0298224450	-0.1090401500	-0.0354371950	-0.1042215000	-0.0418409300	-0.0981132250	-0.0496842000	-0.0935125050	-0.0562422150	-0.0875335800	-0.0617809950	-0.0804585200	-0.0683554300	-0.0747732300	-0.0744355400	-0.0689871700	-0.0797624100	-0.0629293650	-0.0844515400	-0.0552922750	-0.0904748500	-0.0482011650	-0.0957884350	-0.0391799400	-0.1005763150	-0.0295694700	-0.1045844000	-0.0191497050	-0.1090248500	-0.0092856095	-0.1108305500	0.0010545685	-0.1107273000	0.0112426355	-0.1104034000	0.0213838950	-0.1095788000	0.0312525300	-0.1084290500	0.0409332800
0.0022182515	-0.0796805000	-0.0076529330	-0.0802760100	-0.0180062200	-0.0818865450	-0.0279377050	-0.0844318100	-0.0359331200	-0.0856664400	-0.0426404050	-0.0854374300	-0.0499054600	-0.0826775400	-0.0577686600	-0.0786287600	-0.0657176450	-0.0740318300	-0.0731343600	-0.0689751500	-0.0801362900	-0.0645084550	-0.0871982850	-0.0616919100	-0.0944800550	-0.0602974400	-0.1019116500	-0.0581435550	-0.1090530500	-0.0562008750	-0.1148558000	-0.0523949650	-0.1201538000	-0.0467126150	-0.1252930500	-0.0411303900	-0.1284527000	-0.0337286500	-0.1303544000	-0.0253257300	-0.1303960500	-0.0160368700	-0.1299198500	-0.0064062405	-0.1291848000	0.0032331525	-0.1277655500	0.0129852350	-0.1255613000	0.0225080600
0.0020338190	-0.0730556700	-0.0086728215	-0.0741279750	-0.0202194900	-0.0755110400	-0.0309923600	-0.0781380800	-0.0397923000	-0.0795230550	-0.0468312800	-0.0807662200	-0.0541550400	-0.0814389250	-0.0612714650	-0.0788162000	-0.0685620650	-0.0747266000	-0.0758149450	-0.0702535900	-0.0826215750	-0.0658158250	-0.0888564650	-0.0621276350	-0.0950431700	-0.0594260750	-0.1004889650	-0.0559512100	-0.1061144000	-0.0522498850	-0.1109378000	-0.0475086850	-0.1172850500	-0.0432203150	-0.1235141500	-0.0381499450	-0.1283787500	-0.0312042750	-0.1311632500	-0.0226231250	-0.1327839500	-0.0131876500	-0.1331810500	-0.0036813885	-0.1329853000	0.0056541775	-0.1321974500	0.0149352750	-0.1307341500	0.0240346700
0.0018386240	-0.0660442450	-0.0092346030	-0.0674512950	-0.0212399600	-0.0702596150	-0.0328455250	-0.0735696800	-0.0420598150	-0.0763367500	-0.0495572400	-0.0775754600	-0.0576504500	-0.0766416250	-0.0660590150	-0.0743223400	-0.0746425150	-0.0717570450	-0.0825740250	-0.0687262500	-0.0894871500	-0.0654621100	-0.0957821850	-0.0623815850	-0.1023924500	-0.0604531650	-0.1091592000	-0.0593817550	-0.1154697500	-0.0574540400	-0.1208197500	-0.0546036250	-0.1247102500	-0.0494669350	-0.1276104000	-0.0430797950	-0.1307800000	-0.0360814200	-0.1319057000	-0.0282292100	-0.1311639500	-0.0198260100	-0.1287046000	-0.0114034250	-0.1259207000	-0.0027093275	-0.1233190500	0.0068006930	-0.1203256000	0.0165076400
0.0030178535	-0.1084031000	-0.0062033565	-0.1086989500	-0.0160030000	-0.1097755500	-0.0252289200	-0.1097154000	-0.0322248550	-0.1089616000	-0.0379167300	-0.1072447500	-0.0443808900	-0.1044260000	-0.0509904300	-0.0995342100	-0.0576065500	-0.0940997950	-0.0643880650	-0.0884888700	-0.0708581050	-0.0831364750	-0.0768936750	-0.0784193750	-0.0818652750	-0.0733207350	-0.0869473600	-0.0671007950	-0.0916959500	-0.0599553450	-0.0955843000	-0.0526929400	-0.0998953100	-0.0450133550	-0.1035432450	-0.0365452450	-0.1068317500	-0.0271739050	-0.1082394500	-0.0168019100	-0.1098510500	-0.0061729875	-0.1110121000	0.0044983155	-0.1114457000	0.0148758650	-0.1094198500	0.0249702950	-0.1079062000	0.0351189050
0.0019606190	-0.0704265050	-0.0065680545	-0.0711060700	-0.0163112200	-0.0713829550	-0.0256747350	-0.0708752900	-0.0324401650	-0.0717401600	-0.0381385000	-0.0725279650	-0.0454830450	-0.0729984300	-0.0541307650	-0.0719400400	-0.0630056950	-0.0695543050	-0.0717821800	-0.0682049250	-0.0801041450	-0.0682245000	-0.0879578600	-0.0677241350	-0.0953565600	-0.0665710750	-0.1031755500	-0.0650589000	-0.1105679500	-0.0631935750	-0.1164203500	-0.0589959450	-0.1220907500	-0.0532760550	-0.1266818500	-0.0465371250	-0.1300063500	-0.0388081100	-0.1320643500	-0.0310229250	-0.1325205500	-0.0226534950	-0.1288612500	-0.0143429450	-0.1245798500	-0.0058114095	-0.1204632500	0.0033280870	-0.1184678500	0.0135029450
0.0023439730	-0.0841969650	-0.0081007570	-0.0851632250	-0.0193564500	-0.0853257700	-0.0299751400	-0.0866166450	-0.0382587750	-0.0864580350	-0.0448258950	-0.0854972350	-0.0520851250	-0.0829162850	-0.0600162500	-0.0788747750	-0.0678085400	-0.0741465100	-0.0758404500	-0.0700603500	-0.0837456550	-0.0665576900	-0.0903819050	-0.0625142900	-0.0965882100	-0.0585172900	-0.1031215500	-0.0549064300	-0.1089836000	-0.0504787900	-0.1147801000	-0.0469068700	-0.1200376000	-0.0417023650	-0.1242755000	-0.0353180200	-0.1273427500	-0.0274190300	-0.1296679500	-0.0188416400	-0.1320341000	-0.0102557225	-0.1325808500	-0.0017486200	-0.1312736500	0.0065372875	-0.1296046000	0.0149363850	-0.1277370000	0.0231802500
0.0024329725	-0.0873938100	-0.0079903295	-0.0878547700	-0.0189517200	-0.0881898900	-0.0297150950	-0.0890753100	-0.0379725450	-0.0900642400	-0.0448067000	-0.0893936100	-0.0521804650	-0.0869334000	-0.0601443750	-0.0841203150	-0.0679782550	-0.0817535900	-0.0753940800	-0.0797320750	-0.0820222950	-0.0775646550	-0.0879579300	-0.0738585250	-0.0932813100	-0.0694745650	-0.0992136200	-0.0652167450	-0.1045866000	-0.0598245250	-0.1087433500	-0.0530225750	-0.1132910000	-0.0453447350	-0.1172564500	-0.0369853100	-0.1202397500	-0.0272928900	-0.1234826500	-0.0173394800	-0.1260552000	-0.0072063710	-0.1268248000	0.0026858674	-0.1263604500	0.0121908250	-0.1259756000	0.0213434050	-0.1238785500	0.0299942400
0.0032521745	-0.1168204000	-0.0034920120	-0.1150219500	-0.0106966150	-0.1108706000	-0.0175419100	-0.1066219500	-0.0225405500	-0.1021394000	-0.0270010850	-0.0979532150	-0.0322421400	-0.0924615850	-0.0380763700	-0.0858590900	-0.0449107450	-0.0781544100	-0.0541914850	-0.0726517850	-0.0631949650	-0.0665630600	-0.0719666700	-0.0611769300	-0.0808553500	-0.0570018900	-0.0884914950	-0.0517040800	-0.0962281250	-0.0455652650	-0.1032945000	-0.0391466100	-0.1107713500	-0.0318956250	-0.1181478500	-0.0245623500	-0.1253001500	-0.0173381250	-0.1290303000	-0.0089237850	-0.1296485500	0.0002417030	-0.1292842000	0.0093357800	-0.1290522000	0.0175670650	-0.1255958000	0.0258749300	-0.1221022500	0.0339818650
0.0024254340	-0.0871230450	-0.0045292755	-0.0851431100	-0.0125363000	-0.0850643750	-0.0208295450	-0.0858489350	-0.0267335250	-0.0859402900	-0.0319900900	-0.0842632700	-0.0386385100	-0.0827276050	-0.0463874650	-0.0809961500	-0.0543798400	-0.0789441100	-0.0627544550	-0.0768012800	-0.0706070050	-0.0733893900	-0.0781484250	-0.0701195400	-0.0856607100	-0.0674860750	-0.0926444450	-0.0632486700	-0.1000649550	-0.0600853400	-0.1065651000	-0.0551676400	-0.1126797000	-0.0484595050	-0.1183500500	-0.0413150150	-0.1236362000	-0.0334241150	-0.1271904000	-0.0246689850	-0.1281480500	-0.0148924700	-0.1292273000	-0.0051932730	-0.1299129500	0.0044983145	-0.1289644500	0.0142177100	-0.1270991500	0.0234960900
0.0018183920	-0.0653181350	-0.0084778350	-0.0674043350	-0.0201076950	-0.0692784200	-0.0310605700	-0.0718750000	-0.0393238650	-0.0731110050	-0.0451909500	-0.0722878200	-0.0517030150	-0.0712266000	-0.0590640800	-0.0680951650	-0.0665515550	-0.0637365650	-0.0747997850	-0.0613339300	-0.0825878900	-0.0588777650	-0.0896782150	-0.0574793400	-0.0959625050	-0.0576535450	-0.1021691500	-0.0595033600	-0.1085140000	-0.0586201200	-0.1147844000	-0.0568630200	-0.1205705000	-0.0532060500	-0.1243033500	-0.0472037050	-0.1271404000	-0.0394536850	-0.1301557000	-0.0310235300	-0.1333844000	-0.0221291300	-0.1343242000	-0.0127558850	-0.1344211000	-0.0032992025	-0.1340533000	0.0061616315	-0.1312323500	0.0152567200
0.0021208390	-0.0761822850	-0.0065933760	-0.0780036050	-0.0165591900	-0.0804505600	-0.0266805550	-0.0821453100	-0.0343016600	-0.0831135250	-0.0405431750	-0.0824143250	-0.0475552150	-0.0815932600	-0.0553908600	-0.0801561600	-0.0636907600	-0.0780675500	-0.0716165300	-0.0749888650	-0.0795367000	-0.0730149850	-0.0866108500	-0.0705150850	-0.0937356850	-0.0686198950	-0.1005267400	-0.0652186050	-0.1072359500	-0.0615026500	-0.1130788500	-0.0566134700	-0.1189226000	-0.0508926200	-0.1239205500	-0.0445723800	-0.1265521000	-0.0364986550	-0.1277600500	-0.0274056200	-0.1284136000	-0.0174453800	-0.1276059500	-0.0071867205	-0.1261892500	0.0030717220	-0.1246671000	0.0134741850	-0.1226570000	0.0236992200
0.0019415260	-0.0697413000	-0.0092485400	-0.0700335950	-0.0211284100	-0.0709827800	-0.0321681500	-0.0741718850	-0.0404612850	-0.0776396250	-0.0469926150	-0.0795577250	-0.0539631450	-0.0798794350	-0.0616487400	-0.0793381850	-0.0694166350	-0.0795954600	-0.0767323850	-0.0801161450	-0.0838513950	-0.0785873000	-0.0905019350	-0.0767402700	-0.0963399500	-0.0735660850	-0.1021145500	-0.0697903650	-0.1074671000	-0.0647341550	-0.1127292500	-0.0592998650	-0.1174912000	-0.0522572300	-0.1216967000	-0.0444529850	-0.1255345000	-0.0357511650	-0.1276533500	-0.0261057800	-0.1289316500	-0.0159445850	-0.1285617500	-0.0057437765	-0.1275327500	0.0043888555	-0.1251272000	0.0145006250	-0.1215202000	0.0242980750
0.0020096275	-0.0721877000	-0.0078603220	-0.0734151700	-0.0188804450	-0.0755503700	-0.0299707850	-0.0765831700	-0.0388692400	-0.0780759150	-0.0462582100	-0.0795210200	-0.0544135200	-0.0804235550	-0.0626768800	-0.0800325450	-0.0700422500	-0.0765331700	-0.0773357800	-0.0728961050	-0.0850712200	-0.0704911050	-0.0922905550	-0.0678444400	-0.0990296200	-0.0650551400	-0.1052410000	-0.0612041250	-0.1111056000	-0.0566870050	-0.1167771500	-0.0526943950	-0.1210356500	-0.0466357650	-0.1244083000	-0.0396217550	-0.1266389500	-0.0313640950	-0.1297460500	-0.0230132050	-0.1317860500	-0.0143004100	-0.1313677500	-0.0054056250	-0.1304979000	0.0035303275	-0.1284137000	0.0124495900	-0.1259558000	0.0213169000
0.0017250850	-0.0619667450	-0.0087765840	-0.0634035400	-0.0201658850	-0.0663184850	-0.0312407700	-0.0689887000	-0.0401018000	-0.0719898350	-0.0470886450	-0.0746897600	-0.0548840800	-0.0759758350	-0.0631890550	-0.0743096100	-0.0717872000	-0.0725813500	-0.0802352950	-0.0720557950	-0.0881804750	-0.0710374100	-0.0953161150	-0.0699264750	-0.1016459000	-0.0672958850	-0.1077250000	-0.0638198150	-0.1129423000	-0.0585347450	-0.1181252000	-0.0529467750	-0.1232933000	-0.0462829900	-0.1284041500	-0.0396292400	-0.1318483500	-0.0315635250	-0.1341998500	-0.0228495250	-0.1352940000	-0.0137005850	-0.1361701500	-0.0049026805	-0.1344811000	0.0035737545	-0.1318614000	0.0121724550	-0.1290556500	0.0207247800
0.0035613165	-0.1279260000	-0.0037282310	-0.1272220000	-0.0116034860	-0.1266713500	-0.0192660200	-0.1252406500	-0.0252732400	-0.1229230000	-0.0302174750	-0.1201307500	-0.0358792050	-0.1170108000	-0.0415117900	-0.1123735500	-0.0456606600	-0.1056472000	-0.0496553250	-0.0978491100	-0.0529818650	-0.0894879350	-0.0549206650	-0.0809289100	-0.0562209550	-0.0722210150	-0.0585781950	-0.0632332200	-0.0603375000	-0.0534199800	-0.0622803950	-0.0434518750	-0.0650557250	-0.0328646950	-0.0686794800	-0.0231707700	-0.0753360000	-0.0147182600	-0.0832380650	-0.0067470530	-0.0903198150	0.0017440909	-0.0952973700	0.0105208800	-0.0970202950	0.0200848250	-0.0981996200	0.0296223450	-0.0982980200	0.0392349050
0.0027504330	-0.0987983600	-0.0059084520	-0.0991470800	-0.0153468800	-0.0998664150	-0.0246367400	-0.0990410050	-0.0323051250	-0.0974526500	-0.0386576450	-0.0954558150	-0.0455179700	-0.0917141200	-0.0534821100	-0.0882654550	-0.0607728500	-0.0835787550	-0.0675454600	-0.0776481450	-0.0738771400	-0.0718723400	-0.0804068950	-0.0670709900	-0.0870000950	-0.0624035850	-0.0937204400	-0.0573891650	-0.1001049100	-0.0520780600	-0.1061673500	-0.0475797400	-0.1124729000	-0.0416438450	-0.1184954000	-0.0351547650	-0.1233653000	-0.0274301800	-0.1276067500	-0.0193895300	-0.1286912000	-0.0103602150	-0.1277581500	-0.0010208857	-0.1261244000	0.0084034720	-0.1240796000	0.0179749800	-0.1213659000	0.0274571400
0.0024749860	-0.0889041600	-0.0069765025	-0.0898555350	-0.0168275800	-0.0923623550	-0.0264818500	-0.0952174600	-0.0343198900	-0.0975438200	-0.0405944050	-0.0995411650	-0.0473384900	-0.0995416950	-0.0550692450	-0.0973676150	-0.0628482200	-0.0955478900	-0.0689770750	-0.0908629700	-0.0744521500	-0.0856731000	-0.0781052750	-0.0796432100	-0.0815330950	-0.0738525750	-0.0850500050	-0.0672892750	-0.0903211400	-0.0610287800	-0.0950417650	-0.0541048100	-0.0996295350	-0.0453913600	-0.1052731000	-0.0367881950	-0.1111505500	-0.0274865450	-0.1161398500	-0.0175962600	-0.1183676000	-0.0067786960	-0.1193319500	0.0039769515	-0.1197167500	0.0144453400	-0.1200120500	0.0244455700	-0.1173472500	0.0338228500
0.0023492660	-0.0843883000	-0.0053109935	-0.0853200600	-0.0138035100	-0.0858332800	-0.0222431050	-0.0857472250	-0.0292040700	-0.0857809700	-0.0350943200	-0.0840165550	-0.0419712300	-0.0814076800	-0.0500544400	-0.0790747550	-0.0585089900	-0.0767148000	-0.0669463950	-0.0746219100	-0.0751810350	-0.0728442150	-0.0828341750	-0.0706166650	-0.0899977100	-0.0671682250	-0.0972127750	-0.0628621050	-0.1042922500	-0.0575713500	-0.1109997500	-0.0518778750	-0.1178861500	-0.0452857250	-0.1240959000	-0.0381303250	-0.1292198500	-0.0300801650	-0.1328537000	-0.0212042400	-0.1347402000	-0.0119029550	-0.1349764000	-0.0027043935	-0.1333412000	0.0061028015	-0.1294406500	0.0147051550	-0.1248646000	0.0234794150
0.0024833575	-0.0892050900	-0.0065920710	-0.0888488050	-0.0166708550	-0.0890492650	-0.0266476500	-0.0889484350	-0.0346639750	-0.0891400450	-0.0412573900	-0.0902084750	-0.0484338600	-0.0900403900	-0.0557589100	-0.0873584500	-0.0625621400	-0.0827042050	-0.0695956550	-0.0777074250	-0.0763894750	-0.0725359400	-0.0831959000	-0.0683061650	-0.0901608150	-0.0646695700	-0.0971676400	-0.0606933650	-0.1036606500	-0.0554113050	-0.1101210500	-0.0501807650	-0.1160034000	-0.0435036800	-0.1213662000	-0.0365343100	-0.1260473000	-0.0290785000	-0.1286320000	-0.0210387150	-0.1280634000	-0.0122988000	-0.1266456000	-0.0030867195	-0.1255495500	0.0063111465	-0.1244821000	0.0158707000	-0.1225560500	0.0252421400
0.0018807385	-0.0675583950	-0.0097473885	-0.0680804300	-0.0223486300	-0.0689755100	-0.0342079650	-0.0717106750	-0.0435518250	-0.0742909850	-0.0507548350	-0.0769156700	-0.0589716450	-0.0778517550	-0.0676431800	-0.0777409400	-0.0760158100	-0.0764366500	-0.0836570100	-0.0742518850	-0.0903376850	-0.0717285600	-0.0958634950	-0.0695701600	-0.0993513700	-0.0664830450	-0.1035837500	-0.0624211550	-0.1094500500	-0.0593905750	-0.1153877500	-0.0564098050	-0.1211508000	-0.0523297900	-0.1248792500	-0.0462480000	-0.1279691000	-0.0389286250	-0.1291742500	-0.0304512600	-0.1295208500	-0.0212477750	-0.1279751000	-0.0116993300	-0.1263651000	-0.0019837305	-0.1238962500	0.0079225455	-0.1197904000	0.0175242550
0.0022207155	-0.0797708050	-0.0077811940	-0.0801547100	-0.0189585900	-0.0802981100	-0.0297801850	-0.0817677000	-0.0386000950	-0.0821854050	-0.0459030200	-0.0820926750	-0.0543675750	-0.0817399100	-0.0634014150	-0.0808982050	-0.0722399250	-0.0801141350	-0.0802984450	-0.0780143850	-0.0875979350	-0.0754503550	-0.0932065900	-0.0712413900	-0.0980569750	-0.0662978300	-0.1034612000	-0.0615776100	-0.1087466500	-0.0561079650	-0.1133851500	-0.0500039700	-0.1176289000	-0.0424628400	-0.1224021000	-0.0350792450	-0.1257882500	-0.0266395200	-0.1283397500	-0.0178053300	-0.1298250500	-0.0086842830	-0.1300157500	0.0002174045	-0.1287817500	0.0090098310	-0.1281425000	0.0178130700	-0.1263497000	0.0261030100
0.0030574590	-0.1098277500	-0.0048252105	-0.1085281500	-0.0135226100	-0.1054549500	-0.0220051950	-0.1020741750	-0.0296307200	-0.1005927900	-0.0361277550	-0.0990137150	-0.0438210250	-0.0976175400	-0.0517113300	-0.0950233700	-0.0595064000	-0.0916737900	-0.0670599450	-0.0881376550	-0.0727597450	-0.0821704750	-0.0783110800	-0.0765394700	-0.0837815000	-0.0711496850	-0.0894345050	-0.0657134750	-0.0939720800	-0.0585890750	-0.0984149400	-0.0507544050	-0.1033854500	-0.0419209950	-0.1084457000	-0.0330002000	-0.1117834500	-0.0229205750	-0.1151178500	-0.0124038555	-0.1175750000	-0.0017166030	-0.1195944000	0.0083169980	-0.1196308000	0.0178330350	-0.1189481500	0.0269788700	-0.1167038000	0.0357568500
0.0024817470	-0.0891476050	-0.0062340760	-0.0893249250	-0.0158095400	-0.0889598050	-0.0251340000	-0.0886414450	-0.0324922800	-0.0861116700	-0.0389062050	-0.0835655550	-0.0466884650	-0.0813059800	-0.0555191500	-0.0788398450	-0.0645382350	-0.0765928650	-0.0734786900	-0.0746288500	-0.0818554400	-0.0722385700	-0.0894830300	-0.0697120550	-0.0965052700	-0.0669626250	-0.1033519000	-0.0630975500	-0.1098722000	-0.0583190900	-0.1158789500	-0.0534489000	-0.1205913000	-0.0467667650	-0.1240388500	-0.0391302100	-0.1270436500	-0.0304357250	-0.1293375500	-0.0214944950	-0.1293485500	-0.0118807850	-0.1297717000	-0.0023004460	-0.1290500500	0.0070294355	-0.1277817500	0.0163595600	-0.1243000500	0.0248503200
0.0017358535	-0.0623541250	-0.0087103670	-0.0628567900	-0.0197855850	-0.0654964900	-0.0303409100	-0.0697817150	-0.0390979350	-0.0729417100	-0.0465231850	-0.0747117100	-0.0546964750	-0.0764391000	-0.0632677350	-0.0771432100	-0.0715468800	-0.0762478850	-0.0794652100	-0.0743444450	-0.0871028500	-0.0727986200	-0.0941636150	-0.0713563900	-0.1006439600	-0.0693013700	-0.1069784500	-0.0666246150	-0.1127878500	-0.0627080950	-0.1178406500	-0.0580840350	-0.1218411500	-0.0515293050	-0.1257226000	-0.0444805250	-0.1287461500	-0.0363658000	-0.1306466500	-0.0274916800	-0.1310118000	-0.0180085250	-0.1305450000	-0.0085952705	-0.1281654500	0.0004483766	-0.1245989000	0.0095554100	-0.1210057500	0.0188647050
0.0018192180	-0.0653488100	-0.0092208195	-0.0667378950	-0.0211600200	-0.0689221950	-0.0324351400	-0.0723675650	-0.0416721950	-0.0746667500	-0.0493581700	-0.0754755550	-0.0577640600	-0.0754133400	-0.0660856550	-0.0772964450	-0.0738587150	-0.0780129100	-0.0811860850	-0.0771268600	-0.0878692900	-0.0756909750	-0.0933653450	-0.0725306150	-0.0983784600	-0.0688332800	-0.1037580500	-0.0647605250	-0.1090670000	-0.0600378100	-0.1137884000	-0.0546207450	-0.1189255500	-0.0488026250	-0.1229157500	-0.0417692400	-0.1260904500	-0.0335535550	-0.1290995500	-0.0250028600	-0.1300505500	-0.0158963750	-0.1293116000	-0.0068272215	-0.1282848500	0.0020516155	-0.1254817000	0.0108197700	-0.1230481000	0.0196462550
0.0033242265	-0.1194107500	-0.0035936675	-0.1192651500	-0.0109987200	-0.1176401000	-0.0183640500	-0.1152754500	-0.0247086750	-0.1136476500	-0.0299969500	-0.1112702000	-0.0360246100	-0.1073889500	-0.0431457150	-0.1030886000	-0.0503052750	-0.0980672800	-0.0573011550	-0.0929255350	-0.0631881750	-0.0866582850	-0.0684539200	-0.0804183600	-0.0734914200	-0.0742594000	-0.0785198900	-0.0677398700	-0.0838893750	-0.0611859600	-0.0886411150	-0.0540513150	-0.0924952250	-0.0452775900	-0.0955243250	-0.0355711650	-0.0990071500	-0.0250627050	-0.1011539500	-0.0138659200	-0.1025067500	-0.0023946878	-0.1028871500	0.0088056430	-0.1024830000	0.0196197600	-0.1014483750	0.0299713350	-0.0997628950	0.0401437250
0.0030015640	-0.1078204000	-0.0046386430	-0.1079438000	-0.0129645350	-0.1077501000	-0.0209306450	-0.1062021500	-0.0276700250	-0.1048822500	-0.0329284100	-0.1017106000	-0.0391602350	-0.0975027250	-0.0454416400	-0.0916154700	-0.0513096550	-0.0847598650	-0.0570276200	-0.0779190650	-0.0622332050	-0.0711368950	-0.0685930600	-0.0659152400	-0.0753665000	-0.0612263450	-0.0830486350	-0.0572934300	-0.0907823900	-0.0525593800	-0.0986033900	-0.0476359800	-0.1060596000	-0.0413838150	-0.1126003000	-0.0343581550	-0.1174625500	-0.0257635750	-0.1216213000	-0.0168125200	-0.1236365500	-0.0071738720	-0.1252957500	0.0020838560	-0.1249808500	0.0109275350	-0.1237398500	0.0199079450	-0.1208087000	0.0288407250
0.0028003950	-0.1005942150	-0.0067628740	-0.1021165500	-0.0171862950	-0.1016634000	-0.0273195200	-0.1013966000	-0.0351640150	-0.1013369500	-0.0412682700	-0.1004719000	-0.0474393550	-0.0970096350	-0.0547649450	-0.0933240800	-0.0617915050	-0.0886685350	-0.0684347550	-0.0841388950	-0.0734045350	-0.0778176000	-0.0788000350	-0.0722029100	-0.0843791450	-0.0666644000	-0.0899440450	-0.0604790400	-0.0963658200	-0.0544399050	-0.1022566500	-0.0479576850	-0.1088049500	-0.0410801800	-0.1145543500	-0.0334993950	-0.1192090500	-0.0249045200	-0.1224380500	-0.0156965150	-0.1242932000	-0.0060690605	-0.1249476000	0.0032761530	-0.1244294000	0.0121887900	-0.1224091500	0.0211090400	-0.1186996000	0.0295644750
0.0026372175	-0.0947328100	-0.0069327270	-0.0959481050	-0.0173809000	-0.0973138200	-0.0271802700	-0.0990553250	-0.0346724100	-0.1002445500	-0.0405420700	-0.0991151700	-0.0467710800	-0.0953947850	-0.0536730250	-0.0903894500	-0.0600114400	-0.0843976100	-0.0667724950	-0.0787730400	-0.0737243750	-0.0736134100	-0.0802000000	-0.0683189500	-0.0865618550	-0.0629975050	-0.0932588600	-0.0575486200	-0.0998445550	-0.0514672100	-0.1061315500	-0.0452871750	-0.1126146000	-0.0387234150	-0.1181300500	-0.0320816350	-0.1214600000	-0.0245924850	-0.1232003500	-0.0155602950	-0.1256068500	-0.0064090465	-0.1263111000	0.0027678165	-0.1271086500	0.0117367350	-0.1253334500	0.0206767200	-0.1227696000	0.0295367100
0.0025792335	-0.0926499300	-0.0073996795	-0.0928770500	-0.0181182400	-0.0918372550	-0.0280784650	-0.0898449250	-0.0358721950	-0.0872405250	-0.0424635450	-0.0855752650	-0.0501511100	-0.0841873600	-0.0584825600	-0.0828952900	-0.0664690200	-0.0816465750	-0.0731727750	-0.0792513800	-0.0792829600	-0.0763034300	-0.0835732150	-0.0717096450	-0.0880768150	-0.0669847050	-0.0933724850	-0.0618182400	-0.0992757150	-0.0564022300	-0.1042392500	-0.0502498900	-0.1093085000	-0.0425703400	-0.1144885000	-0.0347565600	-0.1197426500	-0.0261223400	-0.1245152000	-0.0171321400	-0.1273630000	-0.0074718200	-0.1285685000	0.0021948720	-0.1297110000	0.0115288550	-0.1285617500	0.0206991900	-0.1261338500	0.0296741250
0.0024780940	-0.0890168850	-0.0086129400	-0.0898856100	-0.0206900900	-0.0915163150	-0.0326046050	-0.0920701850	-0.0422327050	-0.0915339650	-0.0501243050	-0.0903652750	-0.0589597400	-0.0893389350	-0.0680322300	-0.0876061400	-0.0761841000	-0.0846593500	-0.0831666000	-0.0806743550	-0.0894415300	-0.0769130300	-0.0941848550	-0.0722068800	-0.0973046100	-0.0665623900	-0.1017151000	-0.0616685200	-0.1055560500	-0.0561064400	-0.1079261000	-0.0493945700	-0.1102498000	-0.0418776300	-0.1131999500	-0.0342206850	-0.1173158000	-0.0260704850	-0.1206809500	-0.0174783600	-0.1210788500	-0.0082868030	-0.1193565500	0.0009606228	-0.1177899000	0.0099081255	-0.1172964000	0.0192369650	-0.1174525500	0.0286165400
0.0022184315	-0.0796895750	-0.0084888250	-0.0802070750	-0.0198341300	-0.0824102150	-0.0306060200	-0.0848496050	-0.0391083850	-0.0867592500	-0.0462685000	-0.0861688400	-0.0543670950	-0.0835521400	-0.0636648950	-0.0809184350	-0.0724510650	-0.0766377200	-0.0808870400	-0.0724536000	-0.0879969700	-0.0671707550	-0.0958818550	-0.0644806750	-0.1034594000	-0.0612016350	-0.1109100500	-0.0572245300	-0.1173182000	-0.0515051300	-0.1235956000	-0.0460426250	-0.1287932000	-0.0388207050	-0.1330506000	-0.0311407550	-0.1361246500	-0.0224862950	-0.1377568000	-0.0133193000	-0.1374222500	-0.0038811720	-0.1358516000	0.0052057255	-0.1329334000	0.0134706900	-0.1281279500	0.0207680000	-0.1211761500	0.0264844950
0.0024836025	-0.0892149950	-0.0074452960	-0.0890338900	-0.0180539400	-0.0891794550	-0.0280192600	-0.0903977900	-0.0356913650	-0.0902768400	-0.0420040300	-0.0876073200	-0.0496105650	-0.0842820900	-0.0581560100	-0.0804508050	-0.0667990400	-0.0764691550	-0.0755955650	-0.0729019400	-0.0841851950	-0.0694546850	-0.0917767400	-0.0658297950	-0.0978301400	-0.0611009200	-0.1029484000	-0.0553182800	-0.1081456000	-0.0489081100	-0.1127879500	-0.0422668000	-0.1188199000	-0.0365976850	-0.1240275000	-0.0310277250	-0.1278702000	-0.0241820800	-0.1309713000	-0.0160590950	-0.1328803500	-0.0074251260	-0.1338299000	0.0009384123	-0.1327396000	0.0091894945	-0.1302930500	0.0174992900	-0.1278804500	0.0258861550
0.0030153310	-0.1083156000	-0.0033455755	-0.1072788000	-0.0105163700	-0.1058411500	-0.0176579400	-0.1042225500	-0.0238015300	-0.1017361100	-0.0291271000	-0.0983288100	-0.0358152900	-0.0946309850	-0.0433073450	-0.0897987750	-0.0508143100	-0.0841336100	-0.0582101050	-0.0781078150	-0.0658228550	-0.0725012900	-0.0726361000	-0.0667538800	-0.0796064400	-0.0618817950	-0.0871793800	-0.0573938800	-0.0946653600	-0.0521839050	-0.1014656050	-0.0461915050	-0.1074913500	-0.0383278300	-0.1133317000	-0.0301593200	-0.1180671500	-0.0209189400	-0.1229119500	-0.0117599035	-0.1261888500	-0.0025336175	-0.1278139000	0.0062811440	-0.1281874500	0.0147275900	-0.1267721000	0.0231262150	-0.1241362000	0.0311408900
0.0029542195	-0.1061205000	-0.0047895125	-0.1058448000	-0.0130951950	-0.1063815000	-0.0209754950	-0.1064251500	-0.0269427350	-0.1072499500	-0.0324202350	-0.1060410000	-0.0382037600	-0.1035505000	-0.0443228000	-0.1000400750	-0.0504828100	-0.0949757850	-0.0564218300	-0.0890570500	-0.0627237850	-0.0830549200	-0.0682718000	-0.0766894800	-0.0736977300	-0.0702553950	-0.0788056800	-0.0630537650	-0.0837750350	-0.0554330850	-0.0898673300	-0.0486996250	-0.0963135850	-0.0412711350	-0.1027373000	-0.0334057300	-0.1091520500	-0.0250257200	-0.1140351000	-0.0158180550	-0.1168524500	-0.0058570260	-0.1185991000	0.0039088355	-0.1179287000	0.0136282700	-0.1166352500	0.0233689000	-0.1142232000	0.0328027950
0.0017252745	-0.0619747800	-0.0075305890	-0.0619511400	-0.0173188750	-0.0646500200	-0.0272487050	-0.0674831250	-0.0358018150	-0.0680681200	-0.0431329400	-0.0674796300	-0.0513719750	-0.0687820100	-0.0605342550	-0.0695230400	-0.0695856700	-0.0704515900	-0.0779224950	-0.0710545900	-0.0851676700	-0.0719203350	-0.0912390750	-0.0707582300	-0.0972390800	-0.0691612550	-0.1034586500	-0.0663342150	-0.1096755500	-0.0626660500	-0.1153961000	-0.0583286300	-0.1205881000	-0.0523741750	-0.1251645500	-0.0455636500	-0.1292068500	-0.0377021250	-0.1319509000	-0.0290090700	-0.1331399000	-0.0196726200	-0.1335830000	-0.0103563420	-0.1327784500	-0.0011561523	-0.1303219000	0.0079265770	-0.1266689500	0.0166619450
0.0016139160	-0.0579746750	-0.0084890575	-0.0588573700	-0.0193756800	-0.0607286450	-0.0298876100	-0.0630341700	-0.0381336600	-0.0661495100	-0.0450586700	-0.0682318400	-0.0528846550	-0.0696764150	-0.0611162600	-0.0702148550	-0.0690444050	-0.0705019500	-0.0767563500	-0.0702049000	-0.0842002700	-0.0699279850	-0.0909061900	-0.0695613500	-0.0971975500	-0.0684035450	-0.1033617500	-0.0658483500	-0.1094873500	-0.0626071800	-0.1150473500	-0.0586802950	-0.1202346500	-0.0534568650	-0.1253170500	-0.0481460550	-0.1290746000	-0.0416533200	-0.1304346500	-0.0338530550	-0.1305062500	-0.0249446050	-0.1296684000	-0.0154951200	-0.1290585000	-0.0058850640	-0.1272553500	0.0039696785	-0.1249802000	0.0138927400
0.0034608800	-0.1243207500	-0.0051469050	-0.1243654000	-0.0136042800	-0.1217694000	-0.0218118050	-0.1193046500	-0.0281731550	-0.1187130500	-0.0328285400	-0.1153462500	-0.0385970950	-0.1114851500	-0.0442490950	-0.1065840000	-0.0504431800	-0.1016168000	-0.0558022050	-0.0948849000	-0.0604046550	-0.0872234100	-0.0643382550	-0.0795323050	-0.0677830350	-0.0714531750	-0.0717064200	-0.0631274550	-0.0752943400	-0.0544155400	-0.0775285850	-0.0450579200	-0.0821805250	-0.0349727500	-0.0860587200	-0.0242304300	-0.0911453150	-0.0133988800	-0.0959958650	-0.0020132100	-0.0989431300	0.0098079460	-0.1013868000	0.0211553250	-0.1028032500	0.0319388000	-0.1047577500	0.0418510100	-0.1057243000	0.0507044700
0.0027578580	-0.0990670950	-0.0068142570	-0.0990467550	-0.0172364250	-0.0983588000	-0.0275096150	-0.0975910350	-0.0358429250	-0.0962840650	-0.0431094350	-0.0940745150	-0.0516693600	-0.0925154750	-0.0603324750	-0.0892387700	-0.0687109050	-0.0845027500	-0.0769777050	-0.0805164950	-0.0838076250	-0.0758177300	-0.0898114950	-0.0714306200	-0.0944700050	-0.0658170300	-0.0991813250	-0.0597322500	-0.1045181500	-0.0530820300	-0.1100075000	-0.0464423600	-0.1153578500	-0.0388932050	-0.1199876000	-0.0313383350	-0.1236718500	-0.0231373550	-0.1257539000	-0.0144715700	-0.1279004500	-0.0061869680	-0.1266415500	0.0016097275	-0.1232420500	0.0090799965	-0.1186300000	0.0166208800	-0.1140100500	0.0247077000
0.0021542925	-0.0773860900	-0.0099562760	-0.0772647150	-0.0229801450	-0.0779416450	-0.0353651650	-0.0796242550	-0.0451248000	-0.0815088150	-0.0527582800	-0.0834060200	-0.0611448200	-0.0844304200	-0.0694106800	-0.0846908150	-0.0767275250	-0.0836962100	-0.0828218950	-0.0812739650	-0.0875589400	-0.0768781550	-0.0913856350	-0.0713094400	-0.0957649050	-0.0658302550	-0.0998327950	-0.0595351700	-0.1056948000	-0.0541306900	-0.1113595500	-0.0484891200	-0.1184275500	-0.0436649850	-0.1236822500	-0.0373571050	-0.1268995000	-0.0294618300	-0.1295665000	-0.0209143800	-0.1311714000	-0.0121109150	-0.1315248000	-0.0036790720	-0.1304431500	0.0046122715	-0.1269964500	0.0126179200	-0.1222884000	0.0206072300
0.0022573570	-0.0810883200	-0.0078304340	-0.0816332450	-0.0188204600	-0.0827803450	-0.0295006550	-0.0841465200	-0.0381490850	-0.0855330650	-0.0455112850	-0.0854186800	-0.0537293100	-0.0840030750	-0.0624036650	-0.0820112200	-0.0703557600	-0.0784306650	-0.0775101500	-0.0733228500	-0.0842926500	-0.0679593000	-0.0911878300	-0.0639515050	-0.0978538700	-0.0597768450	-0.1044405500	-0.0553217900	-0.1107396000	-0.0504706850	-0.1160972500	-0.0449165650	-0.1213270000	-0.0382576200	-0.1264277000	-0.0316379750	-0.1300628500	-0.0239672450	-0.1324040500	-0.0157619350	-0.1334751500	-0.0073098270	-0.1326093000	0.0010273129	-0.1316862000	0.0095739695	-0.1295027500	0.0180369000	-0.1275053500	0.0265174500
0.0031362390	-0.1126595000	-0.0048770570	-0.1128988000	-0.0132735200	-0.1132767500	-0.0214438250	-0.1135186000	-0.0276865300	-0.1116332000	-0.0329850400	-0.1087009500	-0.0383991950	-0.1034008700	-0.0447533150	-0.0972336050	-0.0505690450	-0.0903609700	-0.0557571800	-0.0821683150	-0.0602938150	-0.0742599350	-0.0649486250	-0.0665612700	-0.0707156750	-0.0598069150	-0.0779137050	-0.0537714650	-0.0862002250	-0.0487074250	-0.0941928550	-0.0434411300	-0.1018389350	-0.0364036700	-0.1100212000	-0.0303474200	-0.1163210500	-0.0228508350	-0.1215365500	-0.0148465600	-0.1241627500	-0.0061102175	-0.1240748000	0.0029611150	-0.1233671500	0.0122172450	-0.1214174500	0.0214610750	-0.1182861000	0.0302959250
0.0016348460	-0.0587267900	-0.0082071865	-0.0604337350	-0.0188518800	-0.0640425150	-0.0291236700	-0.0679132700	-0.0381109550	-0.0709093600	-0.0456311050	-0.0736486450	-0.0540580200	-0.0763071000	-0.0629701300	-0.0783660300	-0.0717788450	-0.0789725550	-0.0798654350	-0.0783525550	-0.0870556200	-0.0757613950	-0.0937269100	-0.0728163200	-0.1000357150	-0.0694932850	-0.1065153500	-0.0663293150	-0.1124716500	-0.0623333450	-0.1181885000	-0.0584408900	-0.1229889000	-0.0532307500	-0.1255552000	-0.0466056650	-0.1279100500	-0.0390772350	-0.1285931500	-0.0305615100	-0.1295459500	-0.0213873150	-0.1296550500	-0.0120257300	-0.1284798000	-0.0027097795	-0.1251919500	0.0065081830	-0.1211226500	0.0158499950
0.0018652255	-0.0670024000	-0.0087743885	-0.0684603300	-0.0203556300	-0.0689043800	-0.0316413800	-0.0696918300	-0.0406549250	-0.0718777450	-0.0481322550	-0.0733255300	-0.0562815800	-0.0742565150	-0.0647409550	-0.0732054550	-0.0729338450	-0.0727661550	-0.0806482500	-0.0713321900	-0.0878151000	-0.0692825600	-0.0944102800	-0.0668423600	-0.1007633250	-0.0640188500	-0.1072663000	-0.0609965600	-0.1128839000	-0.0561843650	-0.1186139500	-0.0515391900	-0.1242062500	-0.0459466050	-0.1287836500	-0.0396755450	-0.1325452000	-0.0327051100	-0.1345011000	-0.0249330600	-0.1347271000	-0.0164454300	-0.1331784000	-0.0077398745	-0.1309732500	0.0010058802	-0.1279399500	0.0098285840	-0.1249838000	0.0188490350
0.0021788190	-0.0782674550	-0.0071251715	-0.0792052100	-0.0173711600	-0.0816039100	-0.0278138800	-0.0827978400	-0.0367340300	-0.0831877550	-0.0443967150	-0.0824361650	-0.0531469600	-0.0824410650	-0.0624938650	-0.0822603900	-0.0711624250	-0.0805818700	-0.0782299700	-0.0761995050	-0.0839687150	-0.0705168650	-0.0886976600	-0.0651528550	-0.0942995650	-0.0614281100	-0.1003227750	-0.0586973000	-0.1063731500	-0.0568404300	-0.1120492500	-0.0531906200	-0.1171334500	-0.0473856550	-0.1217253500	-0.0407177950	-0.1255146500	-0.0327767450	-0.1286802000	-0.0245074400	-0.1304254500	-0.0158611300	-0.1294724000	-0.0067041630	-0.1288524500	0.0027056998	-0.1269993000	0.0121567500	-0.1242168500	0.0214552350
0.0030229475	-0.1085903000	-0.0056900145	-0.1084492000	-0.0153867600	-0.1080564500	-0.0248391100	-0.1066965000	-0.0327702900	-0.1054700000	-0.0395712900	-0.1039506000	-0.0470587500	-0.1017061800	-0.0550345950	-0.0985639350	-0.0626772450	-0.0942235400	-0.0693705350	-0.0886409500	-0.0762640350	-0.0840132750	-0.0823843950	-0.0794260850	-0.0873575150	-0.0738975600	-0.0925934900	-0.0683786200	-0.0980793350	-0.0628098700	-0.1023800750	-0.0565274100	-0.1051155150	-0.0485009700	-0.1067898500	-0.0395889450	-0.1081027000	-0.0294886050	-0.1087832000	-0.0186739600	-0.1093964500	-0.0074053860	-0.1083360000	0.0037058975	-0.1075069000	0.0145351700	-0.1058259550	0.0251739550	-0.1038281400	0.0354024600
0.0033353510	-0.1198122500	-0.0047009230	-0.1187045000	-0.0135752550	-0.1167381000	-0.0225810100	-0.1155511500	-0.0298877750	-0.1134749000	-0.0358568350	-0.1105348000	-0.0426297150	-0.1074957500	-0.0495828400	-0.1033027000	-0.0561062450	-0.0982554350	-0.0608064300	-0.0909719250	-0.0664717750	-0.0844498800	-0.0713851650	-0.0779839150	-0.0757415550	-0.0713664600	-0.0793398950	-0.0642117200	-0.0819143100	-0.0559300200	-0.0847380900	-0.0476753300	-0.0892856650	-0.0385230200	-0.0935657050	-0.0286487400	-0.0976734850	-0.0177526250	-0.1021500500	-0.0068670305	-0.1057231000	0.0041695854	-0.1093982000	0.0142301050	-0.1120777000	0.0235766150	-0.1133383000	0.0323379350	-0.1118167000	0.0405191100
0.0028878755	-0.1037382000	-0.0055417760	-0.1038467000	-0.0147410350	-0.1034197000	-0.0237774700	-0.1038532000	-0.0312799700	-0.1026312500	-0.0379478850	-0.1013411500	-0.0454715000	-0.0991821400	-0.0535921750	-0.0966377550	-0.0614564050	-0.0937245450	-0.0684755000	-0.0891062450	-0.0750706500	-0.0842019050	-0.0804752650	-0.0789188000	-0.0844138950	-0.0727424400	-0.0886916000	-0.0663538900	-0.0933853600	-0.0594310900	-0.0978022350	-0.0519111700	-0.1031655500	-0.0437385850	-0.1082685000	-0.0350694900	-0.1128537000	-0.0255317200	-0.1172561500	-0.0161220000	-0.1193576000	-0.0061607950	-0.1197409000	0.0036379385	-0.1194572000	0.0130040150	-0.1168498000	0.0219740550	-0.1131762000	0.0306538750
0.0021475030	-0.0771426200	-0.0065976210	-0.0790133900	-0.0166474300	-0.0810651100	-0.0267412150	-0.0823622700	-0.0347381350	-0.0842183750	-0.0413724250	-0.0845664300	-0.0489432400	-0.0829872650	-0.0573532100	-0.0811768250	-0.0658109150	-0.0792986750	-0.0738304000	-0.0767536800	-0.0814983300	-0.0739517950	-0.0882805450	-0.0711854900	-0.0945145950	-0.0684493750	-0.1008323750	-0.0652251000	-0.1069969500	-0.0611005950	-0.1123181500	-0.0562120950	-0.1162545000	-0.0492953450	-0.1199841000	-0.0416445000	-0.1232591000	-0.0330472150	-0.1253344000	-0.0238727750	-0.1274325000	-0.0143950550	-0.1274063500	-0.0048325930	-0.1263593500	0.0047130925	-0.1241869000	0.0143372450	-0.1213547500	0.0237647850
0.0018941590	-0.0680420650	-0.0082310835	-0.0693237750	-0.0194451450	-0.0715961800	-0.0303284100	-0.0741987550	-0.0389258250	-0.0767051300	-0.0461146750	-0.0784281600	-0.0539978650	-0.0798596100	-0.0623647800	-0.0791692700	-0.0706664750	-0.0774608500	-0.0786598000	-0.0755335400	-0.0860434400	-0.0726967000	-0.0927307850	-0.0695570200	-0.0993921000	-0.0669827000	-0.1059118000	-0.0637901500	-0.1119601000	-0.0598146300	-0.1165615000	-0.0542230150	-0.1215559000	-0.0478559950	-0.1259759000	-0.0408690250	-0.1292698500	-0.0327510350	-0.1314937500	-0.0239850300	-0.1323338000	-0.0146782350	-0.1319174000	-0.0053859245	-0.1305452000	0.0036721375	-0.1281139000	0.0126588750	-0.1242819500	0.0213591600
0.0025284240	-0.0908261750	-0.0070299405	-0.0912151300	-0.0174335050	-0.0901650400	-0.0276860650	-0.0895179600	-0.0360665950	-0.0882662650	-0.0431427100	-0.0865735550	-0.0512666100	-0.0841735400	-0.0600046700	-0.0810707850	-0.0687628500	-0.0776348000	-0.0770993100	-0.0737999850	-0.0851150800	-0.0703337800	-0.0922066150	-0.0667452400	-0.0987853500	-0.0633991200	-0.1045094000	-0.0587483300	-0.1103876000	-0.0539808000	-0.1155544500	-0.0487023650	-0.1204474000	-0.0422866700	-0.1244377000	-0.0354047500	-0.1268353500	-0.0272125950	-0.1291573000	-0.0187669950	-0.1296204000	-0.0099271050	-0.1300648000	-0.0012507594	-0.1285238500	0.0071009740	-0.1250293000	0.0152746950	-0.1207084500	0.0233812700
0.0027537675	-0.0989209350	-0.0061772200	-0.0986515600	-0.0153002900	-0.0969821450	-0.0252651000	-0.0971439500	-0.0334853850	-0.0953854050	-0.0410581800	-0.0945305750	-0.0497687250	-0.0923870450	-0.0592292350	-0.0893562800	-0.0684218500	-0.0855771350	-0.0769799450	-0.0813236900	-0.0841254850	-0.0758387000	-0.0906551000	-0.0708812700	-0.0971802600	-0.0662067900	-0.1034817000	-0.0618610500	-0.1079748500	-0.0557246500	-0.1106090000	-0.0485789750	-0.1148794000	-0.0409390700	-0.1172850000	-0.0332532050	-0.1189544500	-0.0243433650	-0.1197543000	-0.0149618550	-0.1226466500	-0.0059908760	-0.1238541000	0.0030123630	-0.1241818500	0.0113799065	-0.1203826000	0.0192950250	-0.1163611000	0.0279973450
0.0030913925	-0.1110492000	-0.0053613010	-0.1110575000	-0.0144370700	-0.1103873000	-0.0231612950	-0.1108618000	-0.0300866900	-0.1109076500	-0.0356740700	-0.1100314000	-0.0417474750	-0.1073850000	-0.0481994950	-0.1042715500	-0.0543653050	-0.0998232700	-0.0600899200	-0.0943684750	-0.0656952750	-0.0890062550	-0.0708948250	-0.0839027850	-0.0759034950	-0.0791380400	-0.0804570500	-0.0734674700	-0.0842376450	-0.0667948300	-0.0862508650	-0.0596640300	-0.0883327050	-0.0505379600	-0.0905243950	-0.0406006050	-0.0922530750	-0.0294768500	-0.0949222000	-0.0179415300	-0.0966748500	-0.0059317855	-0.0975021950	0.0058919070	-0.0989707200	0.0171676500	-0.0990739800	0.0282483200	-0.0978612800	0.0389630950
0.0028305055	-0.1016776700	-0.0058190225	-0.1009017900	-0.0154371150	-0.1005913600	-0.0248521500	-0.0997807500	-0.0324335400	-0.0978198800	-0.0389573300	-0.0963878750	-0.0462340250	-0.0933737650	-0.0542450750	-0.0897461100	-0.0626395450	-0.0863652400	-0.0702370000	-0.0817248700	-0.0776511100	-0.0773131700	-0.0839250600	-0.0722976000	-0.0899799900	-0.0672858350	-0.0957302800	-0.0614384550	-0.1009548500	-0.0545545800	-0.1058273000	-0.0472553300	-0.1110854500	-0.0390574700	-0.1154826000	-0.0302151450	-0.1195547500	-0.0207096650	-0.1235750500	-0.0112578300	-0.1262035000	-0.0018145535	-0.1273338000	0.0072282510	-0.1269550000	0.0158409300	-0.1254110500	0.0244909800	-0.1233291500	0.0327253300
0.0031484630	-0.1130994000	-0.0044010160	-0.1128654500	-0.0124898300	-0.1116070000	-0.0204515600	-0.1091368000	-0.0274456450	-0.1071854500	-0.0334505950	-0.1041242000	-0.0406965800	-0.1004312250	-0.0488195650	-0.0963355650	-0.0564196600	-0.0910928100	-0.0639267800	-0.0860624200	-0.0710803950	-0.0812269150	-0.0771989500	-0.0760049900	-0.0829979600	-0.0709842100	-0.0894174650	-0.0661422550	-0.0944881650	-0.0595775800	-0.0996856700	-0.0528984000	-0.1035428500	-0.0449490700	-0.1064883000	-0.0359014200	-0.1095190000	-0.0260409200	-0.1108626000	-0.0152033000	-0.1125696000	-0.0042742755	-0.1125440500	0.0064431060	-0.1121129500	0.0166054250	-0.1131706000	0.0263413200	-0.1105159500	0.0349789950
0.0024460500	-0.0878672550	-0.0081657845	-0.0887045500	-0.0197541000	-0.0898125350	-0.0310174550	-0.0906501800	-0.0400428450	-0.0911306400	-0.0473661800	-0.0914595700	-0.0551072700	-0.0909376450	-0.0629693800	-0.0890653150	-0.0696418400	-0.0845900100	-0.0755570100	-0.0786938000	-0.0819953150	-0.0734096600	-0.0885648000	-0.0688847650	-0.0950801650	-0.0645655550	-0.1013212000	-0.0595809000	-0.1072867500	-0.0539059800	-0.1128682000	-0.0481669150	-0.1175087000	-0.0408418200	-0.1211383000	-0.0325886350	-0.1237327000	-0.0231453450	-0.1267387000	-0.0137488900	-0.1292348500	-0.0044250905	-0.1301393500	0.0047375075	-0.1298713000	0.0135940300	-0.1275891500	0.0221241650	-0.1248928000	0.0304279300
0.0016241760	-0.0583438800	-0.0080180480	-0.0602743350	-0.0187050900	-0.0633809800	-0.0290132450	-0.0675229250	-0.0374284350	-0.0710490450	-0.0446930550	-0.0727639200	-0.0527940900	-0.0744702050	-0.0614045300	-0.0745505450	-0.0699289450	-0.0736590850	-0.0780780350	-0.0740933900	-0.0857640200	-0.0740929450	-0.0926976600	-0.0731669600	-0.0990089600	-0.0710679850	-0.1048941500	-0.0678396900	-0.1104446000	-0.0636445700	-0.1156801000	-0.0589855400	-0.1204947000	-0.0529632900	-0.1240195500	-0.0456313050	-0.1273048000	-0.0372527800	-0.1295452500	-0.0279978350	-0.1312967000	-0.0183439400	-0.1313958500	-0.0085562395	-0.1302037500	0.0011772534	-0.1286445000	0.0110382230	-0.1262149000	0.0206738000
0.0037504105	-0.1162728000	-0.0070022680	-0.1143972500	-0.0182774250	-0.1108033500	-0.0273302500	-0.1086865000	-0.0341478200	-0.1065605500	-0.0397860900	-0.1049370500	-0.0454275300	-0.1026589500	-0.0508495600	-0.1005453450	-0.0560931450	-0.0971639250	-0.0610788650	-0.0939190100	-0.0663822100	-0.0908112150	-0.0715189800	-0.0869004450	-0.0765584400	-0.0815685650	-0.0814889150	-0.0744646800	-0.0860924400	-0.0665527200	-0.0908201600	-0.0581068950	-0.0952340400	-0.0492537150	-0.0979132100	-0.0392940300	-0.1006470500	-0.0283541750	-0.1025901000	-0.0168200300	-0.1029589000	-0.0052963905	-0.1035897500	0.0052130185	-0.1032438000	0.0154567750	-0.1030315500	0.0254717150	-0.1007434150	0.0351970800
0.0015641325	-0.0484925900	-0.0110227200	-0.0511661750	-0.0247240200	-0.0568019150	-0.0354519250	-0.0610178850	-0.0430092650	-0.0665344400	-0.0487832850	-0.0710436550	-0.0546932650	-0.0746862450	-0.0598299200	-0.0781899700	-0.0642865700	-0.0801368800	-0.0683021300	-0.0807542000	-0.0728295750	-0.0814810200	-0.0785630950	-0.0824653550	-0.0850353650	-0.0825878050	-0.0918590650	-0.0810732150	-0.0976598300	-0.0769150950	-0.1030578500	-0.0701730400	-0.1080647500	-0.0619682750	-0.1123867000	-0.0527668600	-0.1181910500	-0.0434685000	-0.1233086000	-0.0332381950	-0.1263209500	-0.0222235500	-0.1272029500	-0.0116198300	-0.1280272000	-0.0010653659	-0.1281649500	0.0094476485	-0.1271851500	0.0196250250
0.0018567215	-0.0575636050	-0.0099523885	-0.0576980800	-0.0205564750	-0.0596597800	-0.0267618500	-0.0649633100	-0.0300073850	-0.0718776550	-0.0337593850	-0.0763545100	-0.0401231600	-0.0780845850	-0.0471723850	-0.0794641650	-0.0545356400	-0.0807396850	-0.0619852700	-0.0803066100	-0.0697750750	-0.0793648600	-0.0779003050	-0.0777665300	-0.0862220500	-0.0773411600	-0.0940473100	-0.0757760800	-0.0995290050	-0.0706599950	-0.1027518500	-0.0625719300	-0.1074119000	-0.0540337050	-0.1131436500	-0.0457054000	-0.1206411500	-0.0380601300	-0.1274446500	-0.0294307950	-0.1322466000	-0.0200630900	-0.1345807000	-0.0109380850	-0.1338820000	-0.0014310664	-0.1324584000	0.0081266705	-0.1304869500	0.0178636400
0.0023638875	-0.0732873900	-0.0136791600	-0.0738020500	-0.0300587800	-0.0741562950	-0.0425927600	-0.0733708300	-0.0515758650	-0.0742257650	-0.0582933300	-0.0761689650	-0.0652476450	-0.0773721250	-0.0717917150	-0.0779051850	-0.0779250700	-0.0779611300	-0.0829148550	-0.0769619400	-0.0879739900	-0.0766885250	-0.0938287450	-0.0769830650	-0.0995720150	-0.0753159000	-0.1053462000	-0.0719032050	-0.1091809500	-0.0663613900	-0.1121113500	-0.0586906600	-0.1136651000	-0.0495257950	-0.1152035000	-0.0398376150	-0.1185726000	-0.0300256000	-0.1229273000	-0.0203808550	-0.1268254000	-0.0110150250	-0.1296382500	-0.0034065420	-0.1283129000	0.0042282375	-0.1251891500	0.0121777200	-0.1216518000	0.0200425700
0.0031070855	-0.0963287800	-0.0095709820	-0.0972786350	-0.0224783300	-0.1003568500	-0.0330354950	-0.1011871150	-0.0409777900	-0.1026928500	-0.0472713900	-0.1025346000	-0.0536314150	-0.1016082000	-0.0597581500	-0.1009188000	-0.0657987350	-0.0995053750	-0.0711587950	-0.0971090850	-0.0765022500	-0.0947404150	-0.0814264900	-0.0912986800	-0.0859834600	-0.0870978850	-0.0902015200	-0.0808100550	-0.0949091750	-0.0740003300	-0.0987313200	-0.0655990850	-0.1004996000	-0.0560407200	-0.0996498800	-0.0456647150	-0.0981498100	-0.0340595700	-0.0977672500	-0.0214215700	-0.0963793500	-0.0086229200	-0.0947007500	0.0031653135	-0.0937961900	0.0147451800	-0.0936015000	0.0259452600	-0.0934268200	0.0367300550
0.0019298170	-0.0598300550	-0.0102835705	-0.0626257200	-0.0234371500	-0.0665939100	-0.0324152700	-0.0722489850	-0.0387676800	-0.0782246950	-0.0437490500	-0.0831442000	-0.0493764350	-0.0870499350	-0.0554506900	-0.0892239050	-0.0613980700	-0.0893598650	-0.0667321600	-0.0881031650	-0.0731445500	-0.0867913300	-0.0806311500	-0.0857918150	-0.0885778150	-0.0838309250	-0.0961552100	-0.0784122700	-0.1044708500	-0.0727991500	-0.1114867500	-0.0650621100	-0.1167801000	-0.0554715100	-0.1211388500	-0.0452124300	-0.1268417500	-0.0350853550	-0.1310984000	-0.0244757200	-0.1335394000	-0.0142010750	-0.1310280500	-0.0047637565	-0.1263761500	0.0049498755	-0.1207474500	0.0146029750	-0.1148789000	0.0242204200
0.0042129040	-0.1306126500	-0.0046752445	-0.1290458000	-0.0138121950	-0.1258874500	-0.0203952250	-0.1224576000	-0.0252732750	-0.1194780000	-0.0288890750	-0.1162122500	-0.0317100950	-0.1117505500	-0.0347956900	-0.1073421000	-0.0373684000	-0.1012302750	-0.0390627900	-0.0945939600	-0.0418447700	-0.0879980050	-0.0443081450	-0.0810712250	-0.0476940150	-0.0736131300	-0.0513145350	-0.0650598150	-0.0562280550	-0.0571565200	-0.0629763900	-0.0488218600	-0.0707465650	-0.0407597900	-0.0786484450	-0.0328140650	-0.0852841800	-0.0233965450	-0.0903003150	-0.0124792650	-0.0941341450	-0.0013161593	-0.0954068650	0.0092888735	-0.0945284300	0.0197879400	-0.0944611000	0.0300125050	-0.0932439400	0.0397685400
0.0027989535	-0.0867762150	-0.0082863890	-0.0888548800	-0.0196176800	-0.0916484750	-0.0280441450	-0.0943720800	-0.0342806100	-0.0961825550	-0.0388205300	-0.0976464750	-0.0431225000	-0.0971921000	-0.0480066550	-0.0956214050	-0.0526548150	-0.0934323650	-0.0566561750	-0.0903873250	-0.0605411100	-0.0863379350	-0.0649747600	-0.0819619750	-0.0697156200	-0.0760722000	-0.0757901300	-0.0686039250	-0.0823014500	-0.0604155900	-0.0899757050	-0.0519123600	-0.0967051850	-0.0427840050	-0.1028584000	-0.0334220300	-0.1103370000	-0.0250252300	-0.1158767500	-0.0162676500	-0.1183978000	-0.0066988495	-0.1194683500	0.0020825663	-0.1197068000	0.0112474150	-0.1189643000	0.0206239700	-0.1179523000	0.0300009550
0.0024437235	-0.0757632400	-0.0093072940	-0.0765247700	-0.0208946900	-0.0782503200	-0.0296281300	-0.0792256150	-0.0363866700	-0.0817766900	-0.0419483850	-0.0836564150	-0.0479943600	-0.0841389850	-0.0543263850	-0.0837119250	-0.0609707600	-0.0821769700	-0.0674838400	-0.0808081900	-0.0742008100	-0.0787716350	-0.0808647100	-0.0751522550	-0.0882969600	-0.0716911950	-0.0954699000	-0.0662928950	-0.1019168000	-0.0594515550	-0.1088207500	-0.0526240100	-0.1151456000	-0.0455904550	-0.1214045000	-0.0393678350	-0.1267358500	-0.0315657000	-0.1307718500	-0.0227320100	-0.1338807000	-0.0138759700	-0.1342347000	-0.0053540295	-0.1334986500	0.0033468770	-0.1321353500	0.0118222200	-0.1283673500	0.0199053700
0.0020641585	-0.0639955850	-0.0120071200	-0.0653283350	-0.0263686200	-0.0690080250	-0.0375904050	-0.0718191600	-0.0461286900	-0.0742407400	-0.0530443550	-0.0755471650	-0.0598564750	-0.0768540750	-0.0661841250	-0.0769956600	-0.0721211100	-0.0743871600	-0.0777567700	-0.0710545100	-0.0831628100	-0.0676129000	-0.0894383850	-0.0652215500	-0.0968699350	-0.0636897300	-0.1050209000	-0.0618013850	-0.1125077000	-0.0582317550	-0.1194025500	-0.0540983200	-0.1241742000	-0.0482482600	-0.1285126500	-0.0425597000	-0.1320754500	-0.0354841800	-0.1334711000	-0.0271596050	-0.1329915000	-0.0183484750	-0.1325488000	-0.0100272140	-0.1323212000	-0.0012834691	-0.1322380000	0.0074264145	-0.1298898000	0.0160751850
0.0036329235	-0.1126326000	-0.0082753350	-0.1123687500	-0.0201934950	-0.1097761000	-0.0297448500	-0.1088163000	-0.0366025750	-0.1075237000	-0.0420476600	-0.1061532500	-0.0473928750	-0.1034543500	-0.0520503150	-0.1015107500	-0.0563504800	-0.0973320850	-0.0597334350	-0.0924708500	-0.0626066800	-0.0869172900	-0.0679873800	-0.0821664550	-0.0731139450	-0.0757637800	-0.0791056900	-0.0679468550	-0.0846999050	-0.0589866050	-0.0893972200	-0.0485666600	-0.0941055550	-0.0377285950	-0.0978962100	-0.0265435050	-0.1035585000	-0.0156667900	-0.1084331000	-0.0042593465	-0.1122248500	0.0066513970	-0.1152646000	0.0162748000	-0.1167947000	0.0252211650	-0.1170378000	0.0333821550	-0.1158794000	0.0407964600
0.0023152685	-0.0717810400	-0.0109524250	-0.0732926950	-0.0246378400	-0.0757114550	-0.0352119450	-0.0771576000	-0.0431130750	-0.0795150050	-0.0494848000	-0.0806477000	-0.0556223450	-0.0817583550	-0.0612010450	-0.0813929150	-0.0671589450	-0.0797061000	-0.0732800750	-0.0783265750	-0.0795609900	-0.0765707050	-0.0863635850	-0.0748454450	-0.0932678900	-0.0713954450	-0.1005791500	-0.0665807900	-0.1077005000	-0.0610752250	-0.1135099000	-0.0536343000	-0.1186279500	-0.0454822050	-0.1233096000	-0.0370538800	-0.1274936500	-0.0277386500	-0.1310736500	-0.0181254000	-0.1345141000	-0.0093837940	-0.1344291500	-0.0007657835	-0.1345812500	0.0077997000	-0.1336789000	0.0158157100	-0.1304725500	0.0233954600
0.0024703655	-0.0765896850	-0.0121499650	-0.0760999300	-0.0269873750	-0.0763258150	-0.0381158250	-0.0783169800	-0.0464502950	-0.0808949100	-0.0529226300	-0.0824796500	-0.0594305800	-0.0835618750	-0.0654539650	-0.0838727900	-0.0708428850	-0.0825624800	-0.0760637450	-0.0808158200	-0.0819974350	-0.0789991150	-0.0888642700	-0.0778618500	-0.0957733800	-0.0750249800	-0.1031218000	-0.0719830150	-0.1090902500	-0.0666804200	-0.1147876000	-0.0596747200	-0.1194419000	-0.0514026850	-0.1231448000	-0.0423788300	-0.1271819500	-0.0329167450	-0.1293330000	-0.0227800800	-0.1294124000	-0.0120820350	-0.1285348000	-0.0019239622	-0.1270349500	0.0082615475	-0.1247120500	0.0179982000	-0.1211951000	0.0273745600
0.0017716815	-0.0549283000	-0.0144767950	-0.0569172550	-0.0313645000	-0.0595841550	-0.0441782200	-0.0624124950	-0.0537776400	-0.0651656050	-0.0612066500	-0.0677786650	-0.0688734450	-0.0694536250	-0.0760717950	-0.0712667350	-0.0829471700	-0.0723958850	-0.0891427600	-0.0736402150	-0.0952135300	-0.0741566250	-0.1015624500	-0.0738912850	-0.1074779500	-0.0729152050	-0.1117656500	-0.0690723350	-0.1143023000	-0.0626466350	-0.1176010000	-0.0550153000	-0.1214225500	-0.0470783400	-0.1249706500	-0.0387365550	-0.1268669500	-0.0291832900	-0.1287358000	-0.0189777550	-0.1300175000	-0.0095856855	-0.1294182500	-0.0014379305	-0.1275690000	0.0067971855	-0.1252145000	0.0149303550	-0.1237864000	0.0229229350
0.0029807660	-0.0924139850	-0.0111382400	-0.0918689850	-0.0252578550	-0.0907876600	-0.0354965650	-0.0894124000	-0.0419504750	-0.0866924350	-0.0467763000	-0.0831925450	-0.0528233150	-0.0795319850	-0.0593287350	-0.0758416500	-0.0657858400	-0.0714273750	-0.0714977150	-0.0662688450	-0.0768148550	-0.0611737450	-0.0840234550	-0.0590639500	-0.0921699150	-0.0576703950	-0.1007038000	-0.0569806900	-0.1089006500	-0.0562263550	-0.1154962500	-0.0534571700	-0.1202556500	-0.0477086900	-0.1251905000	-0.0412583400	-0.1299497000	-0.0340372150	-0.1316552000	-0.0249450300	-0.1332321500	-0.0154035600	-0.1341539000	-0.0065869620	-0.1326941500	0.0020927641	-0.1300088500	0.0106047185	-0.1279094000	0.0194443650
0.0019659030	-0.0609499500	-0.0119471050	-0.0637812500	-0.0251715700	-0.0690183500	-0.0352192350	-0.0739391400	-0.0428557750	-0.0787066550	-0.0490754800	-0.0811925650	-0.0553416550	-0.0822340750	-0.0615552450	-0.0834247450	-0.0675595550	-0.0827059850	-0.0724170150	-0.0803016850	-0.0768842850	-0.0769816350	-0.0827675600	-0.0749015050	-0.0897922800	-0.0734105150	-0.0978279150	-0.0717477400	-0.1052464500	-0.0684207250	-0.1113084000	-0.0623766600	-0.1157947500	-0.0545169950	-0.1200951000	-0.0459946650	-0.1248377500	-0.0368790250	-0.1283493500	-0.0268626700	-0.1303698500	-0.0164113900	-0.1326564000	-0.0071207730	-0.1311312000	0.0021385075	-0.1284213500	0.0114575350	-0.1251441000	0.0208651250
0.0017929935	-0.0555892100	-0.0108053550	-0.0573763900	-0.0237742500	-0.0595831650	-0.0329530500	-0.0640279500	-0.0397139450	-0.0696108150	-0.0459616750	-0.0729883950	-0.0528361400	-0.0754619150	-0.0597532750	-0.0771911350	-0.0660584100	-0.0790917100	-0.0717311450	-0.0806666450	-0.0775748900	-0.0802422100	-0.0838361200	-0.0786834050	-0.0902969450	-0.0755277900	-0.0973263650	-0.0710172800	-0.1042371500	-0.0655796200	-0.1113761500	-0.0595850900	-0.1179264500	-0.0530334150	-0.1229868000	-0.0450782900	-0.1281188500	-0.0363853650	-0.1327542000	-0.0274421550	-0.1342985000	-0.0177873550	-0.1339887500	-0.0082665900	-0.1323618000	0.0015245110	-0.1305067000	0.0112891950	-0.1291380500	0.0210615350
0.0006652676	-0.0206256150	-0.0124352300	-0.0232471300	-0.0254903350	-0.0281049800	-0.0343471700	-0.0347494200	-0.0416227750	-0.0398150050	-0.0468398100	-0.0448537600	-0.0511167900	-0.0508406500	-0.0549941750	-0.0570985350	-0.0594132150	-0.0624560350	-0.0641795300	-0.0670523600	-0.0692866850	-0.0715582250	-0.0752359850	-0.0759693850	-0.0819113350	-0.0787805100	-0.0888829150	-0.0793494250	-0.0955400250	-0.0766833150	-0.1021310700	-0.0712247750	-0.1094152000	-0.0653892650	-0.1173831500	-0.0598144900	-0.1245966000	-0.0525756000	-0.1298372000	-0.0433041900	-0.1333508000	-0.0330603550	-0.1374283000	-0.0239465900	-0.1388120500	-0.0144003200	-0.1376196000	-0.0048127380	-0.1354523500	0.0049427705
0.0040270575	-0.1248536500	-0.0042373490	-0.1246292000	-0.0128647000	-0.1222432500	-0.0192689500	-0.1180841000	-0.0247424650	-0.1154421500	-0.0290725900	-0.1120523000	-0.0341577650	-0.1087800500	-0.0390631250	-0.1051475000	-0.0440241050	-0.1012505000	-0.0491884950	-0.0976687850	-0.0535844950	-0.0931695650	-0.0587488350	-0.0894707000	-0.0621791000	-0.0837157450	-0.0647826050	-0.0757225800	-0.0667365400	-0.0666657750	-0.0700984900	-0.0564786800	-0.0738912050	-0.0457773250	-0.0790930400	-0.0355766100	-0.0829514000	-0.0239196600	-0.0866095050	-0.0119434050	-0.0906222650	-0.0005000397	-0.0929692550	0.0097580920	-0.0940818200	0.0197551300	-0.0954625150	0.0297937650	-0.0956887550	0.0396098850
0.0029184035	-0.0904814650	-0.0071685185	-0.0914065100	-0.0174687650	-0.0933746700	-0.0251845800	-0.0955756700	-0.0312664100	-0.0951029100	-0.0358305450	-0.0930538900	-0.0398147650	-0.0895715200	-0.0444142750	-0.0857740800	-0.0500585300	-0.0812237250	-0.0560494250	-0.0767102050	-0.0629365550	-0.0727047550	-0.0702989500	-0.0681360100	-0.0791391150	-0.0650263900	-0.0886873100	-0.0610645200	-0.0983701900	-0.0583519300	-0.1063607000	-0.0526530550	-0.1140057000	-0.0472664800	-0.1210674000	-0.0416375800	-0.1259419000	-0.0339837450	-0.1281884500	-0.0245409200	-0.1296857500	-0.0145352950	-0.1306108500	-0.0050609770	-0.1300290000	0.0044144260	-0.1284929000	0.0138150250	-0.1264628000	0.0231958900
0.0025350915	-0.0785974450	-0.0086086000	-0.0789915100	-0.0197605450	-0.0816479600	-0.0283768300	-0.0839124650	-0.0353044250	-0.0855381250	-0.0409232500	-0.0865505500	-0.0466037350	-0.0864333200	-0.0520973150	-0.0840458050	-0.0585222000	-0.0820102450	-0.0648303700	-0.0794211150	-0.0716647550	-0.0773983100	-0.0793133600	-0.0760328050	-0.0871548650	-0.0733918900	-0.0953901700	-0.0700651950	-0.1032255000	-0.0658092250	-0.1106183500	-0.0608190800	-0.1163597500	-0.0542466700	-0.1204392500	-0.0464242550	-0.1241724000	-0.0375513800	-0.1266575500	-0.0278595950	-0.1276278500	-0.0175883850	-0.1277385500	-0.0077869455	-0.1264730000	0.0020691140	-0.1245011000	0.0117151700	-0.1217604500	0.0211869550
0.0022266500	-0.0690345500	-0.0111385350	-0.0706536500	-0.0248514850	-0.0738030000	-0.0355775450	-0.0767749450	-0.0439274400	-0.0792898600	-0.0506406400	-0.0805749850	-0.0575775950	-0.0810421800	-0.0643633450	-0.0814887500	-0.0710296300	-0.0811312900	-0.0773442900	-0.0799788350	-0.0836785500	-0.0781488350	-0.0905247200	-0.0765755350	-0.0975806050	-0.0749661500	-0.1036802500	-0.0700412950	-0.1102170500	-0.0649587050	-0.1163043500	-0.0589377200	-0.1205954000	-0.0514969700	-0.1240872500	-0.0434537350	-0.1273092500	-0.0346399150	-0.1294193000	-0.0250565000	-0.1300676000	-0.0151452450	-0.1292853000	-0.0056638545	-0.1273840000	0.0039718310	-0.1253250500	0.0135248900	-0.1229005500	0.0229521450
0.0018908690	-0.0586242100	-0.0113608450	-0.0602721200	-0.0250489800	-0.0627890500	-0.0354471900	-0.0659439100	-0.0432808900	-0.0695352750	-0.0494912900	-0.0722342000	-0.0560355650	-0.0738387200	-0.0626258400	-0.0743120950	-0.0691396100	-0.0744914700	-0.0753514200	-0.0746610300	-0.0816009350	-0.0753923750	-0.0884272150	-0.0752607400	-0.0955189250	-0.0743120650	-0.1027220500	-0.0721455200	-0.1092641000	-0.0682195900	-0.1142511500	-0.0616074400	-0.1187616500	-0.0540168500	-0.1235474500	-0.0464104800	-0.1275640500	-0.0376850800	-0.1312088000	-0.0284455750	-0.1334304000	-0.0188893900	-0.1331871000	-0.0096629340	-0.1319129500	-0.0001177481	-0.1298322000	0.0092736280	-0.1267537000	0.0184315200
0.0031244285	-0.0968694250	-0.0073868900	-0.0968121150	-0.0189522450	-0.0959568950	-0.0281437350	-0.0944943200	-0.0350062800	-0.0917151750	-0.0409204750	-0.0894730450	-0.0468574950	-0.0869184550	-0.0529572300	-0.0839233250	-0.0593162200	-0.0795324750	-0.0659237550	-0.0752844800	-0.0728642150	-0.0709846400	-0.0793622250	-0.0649633700	-0.0865422050	-0.0584154150	-0.0938001200	-0.0501502950	-0.1020228550	-0.0421271300	-0.1105009500	-0.0342328750	-0.1187781500	-0.0270997150	-0.1269537500	-0.0208680700	-0.1322113500	-0.0126252900	-0.1373949000	-0.0039597265	-0.1419893000	0.0034671375	-0.1426609500	0.0104730700	-0.1409772500	0.0173808900	-0.1370827000	0.0239415700	-0.1333443500	0.0311164350
0.0035073785	-0.1087426500	-0.0078511970	-0.1073010500	-0.0197119600	-0.1061501000	-0.0283530950	-0.1038912500	-0.0346657800	-0.1004761900	-0.0398086500	-0.0966873950	-0.0454132850	-0.0925859800	-0.0499993300	-0.0872184650	-0.0549474600	-0.0810588750	-0.0588145050	-0.0745900700	-0.0640317900	-0.0688531850	-0.0700798600	-0.0634760950	-0.0771125000	-0.0583805300	-0.0850474250	-0.0535788550	-0.0941961500	-0.0507664250	-0.1028023000	-0.0465737000	-0.1101293000	-0.0404651950	-0.1165532500	-0.0334137100	-0.1213095000	-0.0247409300	-0.1246409000	-0.0147565500	-0.1283187000	-0.0049879315	-0.1306977000	0.0039881615	-0.1305215500	0.0129591800	-0.1301744000	0.0217865950	-0.1290574000	0.0302533700
0.0019034385	-0.0590142750	-0.0116928400	-0.0611865500	-0.0259235900	-0.0632519150	-0.0364508250	-0.0665363750	-0.0447363600	-0.0686336000	-0.0514731350	-0.0693219650	-0.0583364100	-0.0690849950	-0.0651971450	-0.0688500750	-0.0723222100	-0.0685716150	-0.0790793150	-0.0694899600	-0.0861080100	-0.0703431950	-0.0938256500	-0.0707313400	-0.1014535500	-0.0714009500	-0.1090740000	-0.0691968300	-0.1163137500	-0.0660702900	-0.1222749000	-0.0609136700	-0.1278222500	-0.0552521750	-0.1312903000	-0.0478859900	-0.1345598000	-0.0393920050	-0.1361460000	-0.0298288450	-0.1366681500	-0.0201075800	-0.1349324000	-0.0111028065	-0.1312921000	-0.0017536080	-0.1268232500	0.0070888825	-0.1216007000	0.0154535850
0.0018414690	-0.0570929850	-0.0119484150	-0.0583913850	-0.0260636050	-0.0607201100	-0.0370027800	-0.0625829750	-0.0454460800	-0.0637783100	-0.0518248050	-0.0660432900	-0.0583361750	-0.0685757550	-0.0647535450	-0.0707471500	-0.0711981800	-0.0719695000	-0.0772301600	-0.0730920200	-0.0834478750	-0.0729751300	-0.0901825850	-0.0732611100	-0.0970480950	-0.0721303800	-0.1039244000	-0.0686188350	-0.1107885000	-0.0644806450	-0.1172691000	-0.0594252150	-0.1223124500	-0.0530159950	-0.1271969500	-0.0463740050	-0.1304215000	-0.0381621650	-0.1326924500	-0.0290341700	-0.1345048500	-0.0196659200	-0.1344515000	-0.0106321250	-0.1338618500	-0.0013615875	-0.1326140000	0.0078239090	-0.1304679500	0.0168845850
0.0021558745	-0.0668410300	-0.0124061100	-0.0691795600	-0.0272270350	-0.0729621350	-0.0383043300	-0.0764346250	-0.0465444300	-0.0794366650	-0.0533628400	-0.0810207400	-0.0604189100	-0.0814927000	-0.0670747900	-0.0812403000	-0.0733195850	-0.0782680450	-0.0795660550	-0.0752955750	-0.0850501900	-0.0714582850	-0.0915841700	-0.0683972800	-0.0987756650	-0.0660798100	-0.1059815500	-0.0620365950	-0.1128538500	-0.0583703450	-0.1168905000	-0.0523413550	-0.1190766000	-0.0450713400	-0.1214157500	-0.0376929150	-0.1247657000	-0.0299724100	-0.1295855500	-0.0224677500	-0.1320671500	-0.0143149500	-0.1320420000	-0.0064830245	-0.1294372000	0.0014290536	-0.1255510500	0.0091609530	-0.1233375000	0.0176268250
0.0013607520	-0.0421890700	-0.0135722300	-0.0432709250	-0.0285252400	-0.0466015700	-0.0395534400	-0.0506542250	-0.0477022600	-0.0550987600	-0.0541909100	-0.0581282900	-0.0603576400	-0.0617755650	-0.0662129100	-0.0656116700	-0.0717453800	-0.0687300350	-0.0766243950	-0.0714792500	-0.0812373050	-0.0738036650	-0.0869719700	-0.0755030450	-0.0931149500	-0.0759759700	-0.0992492300	-0.0731217350	-0.1059286000	-0.0697220700	-0.1121186500	-0.0650082800	-0.1176878500	-0.0591326100	-0.1233267500	-0.0531804650	-0.1271036000	-0.0454471850	-0.1301340000	-0.0366017700	-0.1314867500	-0.0270111300	-0.1315367500	-0.0176051200	-0.1315366000	-0.0078892920	-0.1304895500	0.0017035404	-0.1280822000	0.0112071535
0.0041214840	-0.1277834000	-0.0029762625	-0.1268069000	-0.0095931005	-0.1239145000	-0.0142862700	-0.1209538500	-0.0180704300	-0.1192355000	-0.0214424850	-0.1169704000	-0.0251827500	-0.1140399500	-0.0285340750	-0.1110833500	-0.0304114750	-0.1066189000	-0.0326123750	-0.1019234500	-0.0353130650	-0.0970306200	-0.0391863950	-0.0925726050	-0.0434273600	-0.0870254800	-0.0471470350	-0.0794213950	-0.0495684200	-0.0700588700	-0.0528555450	-0.0592706350	-0.0557473150	-0.0477255400	-0.0577884250	-0.0358253250	-0.0614892750	-0.0236313550	-0.0663163850	-0.0114870085	-0.0701052650	0.0006767215	-0.0733049500	0.0115856195	-0.0756687300	0.0221262950	-0.0770890800	0.0324077200	-0.0781873400	0.0423700800
0.0040109290	-0.1243559000	-0.0036360645	-0.1237995000	-0.0112393800	-0.1222318000	-0.0168081100	-0.1224426500	-0.0204686800	-0.1201556500	-0.0237877400	-0.1172593500	-0.0276739100	-0.1141680500	-0.0314020450	-0.1106668500	-0.0356030800	-0.1058224000	-0.0390844300	-0.1002875500	-0.0406821800	-0.0938029350	-0.0429118150	-0.0869353800	-0.0449488900	-0.0790147100	-0.0489729200	-0.0700080900	-0.0519689450	-0.0595171500	-0.0578276550	-0.0490640450	-0.0642309300	-0.0381061400	-0.0708076550	-0.0270540550	-0.0758801500	-0.0145577950	-0.0819795800	-0.0026856240	-0.0874715650	0.0083416570	-0.0910394050	0.0180092200	-0.0943927800	0.0263824850	-0.0983178200	0.0340252750	-0.1000595350	0.0420035650
0.0022099025	-0.0685164000	-0.0097988860	-0.0696983250	-0.0219932700	-0.0727722250	-0.0314390100	-0.0743018650	-0.0387002800	-0.0744793800	-0.0445308700	-0.0748643850	-0.0510386100	-0.0749576300	-0.0578226750	-0.0753551100	-0.0647071200	-0.0756192800	-0.0714830250	-0.0756289600	-0.0784844750	-0.0751421300	-0.0860335550	-0.0748724300	-0.0938568600	-0.0731310900	-0.1020147000	-0.0698524750	-0.1100020500	-0.0652874250	-0.1176200000	-0.0597796900	-0.1242159000	-0.0535642800	-0.1285996000	-0.0458241200	-0.1318436500	-0.0366830250	-0.1339152500	-0.0266586650	-0.1342430000	-0.0163459750	-0.1336949000	-0.0070049230	-0.1307629500	0.0022507170	-0.1270018500	0.0107780900	-0.1219058000	0.0183452400
0.0021959845	-0.0680850200	-0.0105771600	-0.0688236150	-0.0237922950	-0.0704415600	-0.0338137000	-0.0723950250	-0.0411710850	-0.0745893800	-0.0475556150	-0.0759475500	-0.0543739900	-0.0768431800	-0.0610385900	-0.0777665550	-0.0677458650	-0.0779200700	-0.0740163350	-0.0776117000	-0.0804623350	-0.0760709600	-0.0877728700	-0.0748499000	-0.0951948800	-0.0721509150	-0.1029352500	-0.0680632200	-0.1102611500	-0.0628484300	-0.1171937000	-0.0568634250	-0.1227455500	-0.0498577700	-0.1263464000	-0.0416257050	-0.1288156000	-0.0322015850	-0.1314104500	-0.0222956350	-0.1324910500	-0.0121708750	-0.1340786000	-0.0031330840	-0.1337472000	0.0056971400	-0.1320449500	0.0142576000	-0.1302957000	0.0226359600
0.0019327260	-0.0599230550	-0.0117954100	-0.0606917450	-0.0259200800	-0.0625098600	-0.0364702950	-0.0659136350	-0.0445687350	-0.0697187800	-0.0514547600	-0.0717398200	-0.0584373400	-0.0737761200	-0.0652724900	-0.0751942600	-0.0720496000	-0.0751778150	-0.0786004550	-0.0744624900	-0.0854166450	-0.0737738350	-0.0929349400	-0.0732069350	-0.1005851850	-0.0720182600	-0.1082820000	-0.0698945450	-0.1150551000	-0.0664518000	-0.1200015500	-0.0606827250	-0.1247022500	-0.0541176550	-0.1282177000	-0.0466428150	-0.1312098500	-0.0381630550	-0.1325474000	-0.0286893800	-0.1335020500	-0.0189768100	-0.1331712000	-0.0097330650	-0.1309701000	-0.0004583157	-0.1278811500	0.0085995510	-0.1235275500	0.0172422350
0.0037500355	-0.1162678000	-0.0067609860	-0.1133176000	-0.0177375400	-0.1084145500	-0.0260827400	-0.1033935000	-0.0329704150	-0.1004575000	-0.0385568150	-0.0974543100	-0.0450846000	-0.0951156350	-0.0517534400	-0.0931526050	-0.0586818350	-0.0917834500	-0.0649625950	-0.0908898900	-0.0703321950	-0.0881934000	-0.0758338300	-0.0843936150	-0.0825158450	-0.0809436450	-0.0881771450	-0.0754484450	-0.0928362300	-0.0689011950	-0.0962275750	-0.0610925850	-0.0972221900	-0.0523063400	-0.0979997900	-0.0433801750	-0.0974713350	-0.0331681500	-0.0956190800	-0.0220675200	-0.0937717400	-0.0101482590	-0.0918343900	0.0010954950	-0.0904551150	0.0120817950	-0.0896395950	0.0233336550	-0.0883113150	0.0343939500
0.0035289440	-0.1094130000	-0.0069725335	-0.1090574000	-0.0160469450	-0.1066252000	-0.0233043150	-0.1016421000	-0.0282364200	-0.0981708300	-0.0332979500	-0.0957646450	-0.0389435600	-0.0935813250	-0.0433789750	-0.0897431100	-0.0484445500	-0.0850274300	-0.0546984000	-0.0813944700	-0.0607962900	-0.0772309000	-0.0665831500	-0.0717437100	-0.0738280000	-0.0661796900	-0.0826346400	-0.0616621050	-0.0911733450	-0.0555375400	-0.0984257450	-0.0470810050	-0.1069065000	-0.0401374600	-0.1150437500	-0.0336976800	-0.1211333000	-0.0254261200	-0.1252767000	-0.0159001500	-0.1284301000	-0.0062585835	-0.1293210000	0.0025342619	-0.1275554500	0.0109258780	-0.1249535000	0.0195544700	-0.1222474500	0.0283991150
0.0029573580	-0.0916916750	-0.0093536470	-0.0912040700	-0.0222879450	-0.0895900000	-0.0324564250	-0.0876260800	-0.0404701900	-0.0871914800	-0.0468961900	-0.0871053700	-0.0531390850	-0.0858001900	-0.0593087300	-0.0843239550	-0.0643501250	-0.0799940950	-0.0698986700	-0.0764938350	-0.0761631750	-0.0739815600	-0.0831133200	-0.0721736450	-0.0896986450	-0.0705259650	-0.0962930950	-0.0662649300	-0.1019402750	-0.0603432350	-0.1052854300	-0.0516214550	-0.1097124500	-0.0428957900	-0.1137823500	-0.0338727550	-0.1181588500	-0.0248784400	-0.1238493000	-0.0177280000	-0.1273950000	-0.0092911955	-0.1295780500	-0.0010278566	-0.1295261000	0.0072669145	-0.1290016500	0.0152560500	-0.1276272500	0.0232117550
0.0034845445	-0.1080367000	-0.0066265725	-0.1089076000	-0.0165886550	-0.1085484500	-0.0237687100	-0.1061145000	-0.0293157150	-0.1048794500	-0.0328124650	-0.1013983500	-0.0369028750	-0.0979558300	-0.0394593650	-0.0936268700	-0.0410299100	-0.0880157250	-0.0443624950	-0.0833535500	-0.0493572900	-0.0791221600	-0.0561216900	-0.0758091200	-0.0642472800	-0.0729773250	-0.0735037800	-0.0694360650	-0.0825095400	-0.0641977150	-0.0907574750	-0.0569174150	-0.0981130200	-0.0483314650	-0.1046196500	-0.0390307850	-0.1114162500	-0.0295015500	-0.1167440500	-0.0191543400	-0.1196010000	-0.0081268165	-0.1210664500	0.0021984465	-0.1221007000	0.0125252650	-0.1220514000	0.0226608000	-0.1204117500	0.0325202050
0.0020218855	-0.0626877550	-0.0109318550	-0.0644753200	-0.0237593650	-0.0682701850	-0.0331838400	-0.0720418400	-0.0400598000	-0.0761226750	-0.0454356050	-0.0790257400	-0.0515553800	-0.0802614650	-0.0576705100	-0.0803024800	-0.0640780450	-0.0799999850	-0.0701326700	-0.0798098750	-0.0760199200	-0.0806199900	-0.0823527400	-0.0793040150	-0.0891717500	-0.0765545650	-0.0966317700	-0.0730550850	-0.1035834000	-0.0677525050	-0.1103675500	-0.0615782550	-0.1156751000	-0.0539287050	-0.1202369500	-0.0454098600	-0.1247291000	-0.0361766150	-0.1287993000	-0.0263031850	-0.1308083000	-0.0159078750	-0.1315223500	-0.0060848805	-0.1312696000	0.0037491740	-0.1297216500	0.0132505400	-0.1275397500	0.0225567700
0.0026086880	-0.0808815300	-0.0121491550	-0.0808435050	-0.0270596600	-0.0807287900	-0.0380678850	-0.0810687050	-0.0460122600	-0.0836779900	-0.0522439500	-0.0850382700	-0.0583388400	-0.0853305800	-0.0637363100	-0.0832847750	-0.0686142600	-0.0792723350	-0.0726074100	-0.0745189500	-0.0786687800	-0.0714601550	-0.0863893300	-0.0692212650	-0.0947768700	-0.0671347000	-0.1033598500	-0.0646830850	-0.1105850000	-0.0593833900	-0.1165449500	-0.0525582850	-0.1196136500	-0.0443775500	-0.1240674000	-0.0362631950	-0.1293649000	-0.0279952500	-0.1328748500	-0.0191451650	-0.1330136000	-0.0097251500	-0.1321143500	-0.0011493271	-0.1274646000	0.0066860045	-0.1228908500	0.0148218650	-0.1186340000	0.0229026600
0.0040107775	-0.1243529000	-0.0033200990	-0.1225881000	-0.0116628650	-0.1193035000	-0.0182750950	-0.1165025000	-0.0238148400	-0.1148533000	-0.0282138200	-0.1127150500	-0.0325638300	-0.1098302000	-0.0370305900	-0.1069654500	-0.0415270550	-0.1027819000	-0.0465262450	-0.0995398450	-0.0518862350	-0.0964039650	-0.0562827900	-0.0921056700	-0.0601192650	-0.0865156250	-0.0644457150	-0.0790260500	-0.0689902950	-0.0705329500	-0.0725045500	-0.0603608700	-0.0757541600	-0.0493505550	-0.0787383150	-0.0382126550	-0.0799713650	-0.0256737350	-0.0826237400	-0.0129447200	-0.0832571650	-0.0000430730	-0.0839759650	0.0115316095	-0.0837565600	0.0224266400	-0.0813111400	0.0324971300	-0.0813706700	0.0426136850
0.0021319215	-0.0660996450	-0.0110141850	-0.0659565750	-0.0244236350	-0.0666239100	-0.0345684550	-0.0672755700	-0.0421726950	-0.0675120050	-0.0480940400	-0.0670850450	-0.0544942150	-0.0681275000	-0.0607870900	-0.0703587100	-0.0671197100	-0.0724881300	-0.0731003950	-0.0743858550	-0.0791742550	-0.0758810000	-0.0855378500	-0.0774052850	-0.0917660350	-0.0755980150	-0.0988111700	-0.0726412850	-0.1062402000	-0.0694592650	-0.1127011500	-0.0640716550	-0.1184459500	-0.0576463650	-0.1228408500	-0.0498356650	-0.1261285000	-0.0404600550	-0.1294859500	-0.0304972400	-0.1312318500	-0.0202259650	-0.1312671000	-0.0104872020	-0.1312597000	-0.0006648070	-0.1288367000	0.0088454325	-0.1275404000	0.0185204500
0.0019613030	-0.0608097400	-0.0110553450	-0.0615525700	-0.0246173900	-0.0637043900	-0.0348987950	-0.0663976400	-0.0427898700	-0.0698834850	-0.0491980250	-0.0721752300	-0.0559642150	-0.0735665000	-0.0627524800	-0.0749783750	-0.0696373900	-0.0755312800	-0.0761792250	-0.0761869750	-0.0828634350	-0.0762818700	-0.0900695800	-0.0758855050	-0.0972512800	-0.0739021000	-0.1046811000	-0.0717600150	-0.1109425500	-0.0678210750	-0.1152137000	-0.0610720850	-0.1186141000	-0.0529740000	-0.1220571500	-0.0443077050	-0.1260540000	-0.0349997500	-0.1301210000	-0.0253734650	-0.1328099500	-0.0155351250	-0.1347207000	-0.0065358455	-0.1345096500	0.0023679815	-0.1325684500	0.0108899750	-0.1296480500	0.0193591100
0.0022998790	-0.0713072050	-0.0125198800	-0.0724511350	-0.0276607050	-0.0730913050	-0.0392330400	-0.0746070400	-0.0478696100	-0.0765915750	-0.0545310050	-0.0778933750	-0.0610264200	-0.0789037050	-0.0671837000	-0.0787660600	-0.0730048850	-0.0768288050	-0.0783259200	-0.0735615600	-0.0842510550	-0.0703051900	-0.0904640350	-0.0664513000	-0.0974262550	-0.0630356550	-0.1053583500	-0.0598086800	-0.1132124000	-0.0564512600	-0.1200202500	-0.0523840750	-0.1243819500	-0.0460574900	-0.1289240000	-0.0397228200	-0.1320270500	-0.0323298450	-0.1330799000	-0.0237686250	-0.1340224500	-0.0149809700	-0.1340818500	-0.0067863425	-0.1317943000	0.0015796075	-0.1298650500	0.0101124740	-0.1268699000	0.0184953200
0.0036709885	-0.1138183000	-0.0069834125	-0.1125555500	-0.0186447550	-0.1099283500	-0.0278050350	-0.1072697000	-0.0350099400	-0.1054151500	-0.0406076900	-0.1026246000	-0.0467981450	-0.1002856800	-0.0526411550	-0.0979287550	-0.0586169000	-0.0948830750	-0.0634939850	-0.0905785300	-0.0684413950	-0.0854870600	-0.0738279650	-0.0803458200	-0.0791276050	-0.0739283550	-0.0845866650	-0.0658426650	-0.0915150450	-0.0580719600	-0.0981697500	-0.0492607750	-0.1041740000	-0.0399685000	-0.1095075500	-0.0302145200	-0.1137723000	-0.0194690250	-0.1158239500	-0.0078844355	-0.1173825500	0.0033422810	-0.1195161500	0.0131933250	-0.1186293000	0.0225795800	-0.1171623000	0.0314693400	-0.1142568000	0.0399714100
0.0029534890	-0.0915724400	-0.0086226295	-0.0921471650	-0.0200881800	-0.0919566450	-0.0287610450	-0.0902281000	-0.0347811950	-0.0884061050	-0.0384293450	-0.0841312900	-0.0428356150	-0.0793262100	-0.0472653600	-0.0743582000	-0.0526841200	-0.0697685900	-0.0569488700	-0.0651259900	-0.0626233150	-0.0615357450	-0.0700060750	-0.0591052200	-0.0787247650	-0.0591141500	-0.0882737300	-0.0580779550	-0.0975802800	-0.0554403750	-0.1063940000	-0.0525659450	-0.1135628000	-0.0469199750	-0.1201509000	-0.0401835200	-0.1266746000	-0.0331036300	-0.1302950500	-0.0239677600	-0.1338045000	-0.0146579400	-0.1354743500	-0.0058287340	-0.1347544500	0.0031999935	-0.1339417000	0.0121973300	-0.1331149500	0.0211380850
0.0019360720	-0.0600276650	-0.0126220850	-0.0618006350	-0.0276361950	-0.0645201400	-0.0388512200	-0.0681684400	-0.0472022650	-0.0718639300	-0.0538171200	-0.0744126600	-0.0601626300	-0.0770467850	-0.0660201950	-0.0793851050	-0.0718258250	-0.0796786500	-0.0771872800	-0.0787220900	-0.0824286950	-0.0778671100	-0.0883322700	-0.0765155150	-0.0947486350	-0.0747222100	-0.1009459000	-0.0708622500	-0.1061102000	-0.0646128900	-0.1121949000	-0.0580268450	-0.1171581500	-0.0504713300	-0.1205195000	-0.0421153900	-0.1239441000	-0.0327771650	-0.1279033000	-0.0232013000	-0.1302246500	-0.0131829750	-0.1312909000	-0.0038175610	-0.1315640500	0.0052652835	-0.1311521000	0.0138546150	-0.1284679000	0.0221129050
0.0030406515	-0.0942750700	-0.0093776255	-0.0950102000	-0.0220221550	-0.0948872450	-0.0315922950	-0.0923743200	-0.0391826400	-0.0911328350	-0.0449994050	-0.0887978050	-0.0505465950	-0.0852165400	-0.0566677150	-0.0820367350	-0.0628471600	-0.0776145300	-0.0687215150	-0.0728566950	-0.0749257750	-0.0681900100	-0.0813632250	-0.0627267500	-0.0883661600	-0.0570388950	-0.0968583300	-0.0522940500	-0.1057528000	-0.0482947600	-0.1135910000	-0.0426913500	-0.1211392000	-0.0376915400	-0.1268063000	-0.0313037400	-0.1311099000	-0.0235949350	-0.1333731500	-0.0148977050	-0.1344297500	-0.0058225845	-0.1351862500	0.0025061195	-0.1337717000	0.0107253960	-0.1314795500	0.0187791150	-0.1294041500	0.0269761150
0.0015942130	-0.0494285500	-0.0120079700	-0.0515098250	-0.0262656650	-0.0539435600	-0.0373282550	-0.0574509150	-0.0459199900	-0.0611447550	-0.0529926900	-0.0633516250	-0.0599367350	-0.0657525450	-0.0669864600	-0.0665228850	-0.0742713400	-0.0660490600	-0.0812783900	-0.0654122950	-0.0883978250	-0.0644054650	-0.0960702150	-0.0640221050	-0.1039536500	-0.0634206550	-0.1119101000	-0.0621102900	-0.1190728500	-0.0601924750	-0.1240850500	-0.0558563150	-0.1284117500	-0.0503358750	-0.1326044500	-0.0447541250	-0.1351999000	-0.0377158350	-0.1363875500	-0.0296905350	-0.1370377000	-0.0211562750	-0.1361839500	-0.0128018800	-0.1344335000	-0.0040746420	-0.1321807500	0.0046554780	-0.1296271500	0.0133934250
0.0023660920	-0.0733605550	-0.0101017525	-0.0745454100	-0.0228586100	-0.0767816600	-0.0329057050	-0.0775231150	-0.0406985000	-0.0763002850	-0.0469446550	-0.0742707150	-0.0534401100	-0.0723602000	-0.0602135600	-0.0719522450	-0.0671956550	-0.0715960650	-0.0739048500	-0.0715368550	-0.0805996450	-0.0710235150	-0.0876667150	-0.0712231500	-0.0946407950	-0.0691727050	-0.1017013000	-0.0651237950	-0.1083497500	-0.0594738000	-0.1144383000	-0.0524297600	-0.1217148500	-0.0467099850	-0.1280234500	-0.0405120950	-0.1328381500	-0.0328961700	-0.1363551500	-0.0244069550	-0.1369002000	-0.0152502900	-0.1372521000	-0.0064375440	-0.1364992500	0.0024025505	-0.1340766500	0.0108605050	-0.1300725000	0.0190199100
0.0022560890	-0.0699499700	-0.0105179150	-0.0711507650	-0.0236902200	-0.0748324500	-0.0339667050	-0.0772408650	-0.0419967450	-0.0791686700	-0.0484621850	-0.0798233850	-0.0548005550	-0.0800302150	-0.0608112200	-0.0790226000	-0.0671095700	-0.0770097100	-0.0729355300	-0.0742331800	-0.0788623450	-0.0711414500	-0.0858190250	-0.0690017900	-0.0932094300	-0.0666792050	-0.1002528650	-0.0622530050	-0.1073750500	-0.0571831950	-0.1147266500	-0.0517011850	-0.1213933000	-0.0457479200	-0.1272101000	-0.0393015600	-0.1327675000	-0.0324918300	-0.1360073000	-0.0245817200	-0.1370953500	-0.0161303600	-0.1362447500	-0.0079755455	-0.1331197500	0.0002666918	-0.1305667000	0.0090230230	-0.1269462000	0.0177230700
0.0038392910	-0.1190373000	-0.0068010250	-0.1172107000	-0.0183241050	-0.1143264000	-0.0270623100	-0.1106949500	-0.0337674250	-0.1082866000	-0.0387297650	-0.1049671500	-0.0440544850	-0.1018842000	-0.0496955750	-0.0989790750	-0.0559595700	-0.0962384750	-0.0617823650	-0.0930259250	-0.0673832750	-0.0892573500	-0.0728578200	-0.0849217550	-0.0786027700	-0.0807625500	-0.0831660500	-0.0740247100	-0.0870520150	-0.0657914950	-0.0898385800	-0.0558963950	-0.0907612150	-0.0451525000	-0.0928863450	-0.0343432000	-0.0960715950	-0.0230173850	-0.1002605700	-0.0116388200	-0.1040576500	-0.0005429045	-0.1061409000	0.0091803685	-0.1054911500	0.0186883150	-0.1055053500	0.0280005650	-0.1052770000	0.0372113800
0.0025387440	-0.0787137950	-0.0113187950	-0.0791370200	-0.0255210950	-0.0800495550	-0.0363372950	-0.0811747200	-0.0447519000	-0.0810778200	-0.0514585300	-0.0808476150	-0.0580647150	-0.0788925150	-0.0645157600	-0.0770013800	-0.0713056250	-0.0749315950	-0.0778982400	-0.0723227750	-0.0845751400	-0.0692063500	-0.0917655600	-0.0655976900	-0.0993071900	-0.0614532600	-0.1070783500	-0.0565737250	-0.1147704500	-0.0514911550	-0.1212255000	-0.0451095850	-0.1266739500	-0.0386807150	-0.1305085500	-0.0312019650	-0.1337642000	-0.0229079800	-0.1359888500	-0.0145302050	-0.1364547000	-0.0061091160	-0.1355362000	0.0019703355	-0.1345456000	0.0103537480	-0.1322920000	0.0183430000	-0.1290268500	0.0260815850
0.0018134875	-0.0562272500	-0.0103496000	-0.0580821200	-0.0233358750	-0.0611344000	-0.0334775150	-0.0640304700	-0.0415569700	-0.0663430050	-0.0477927250	-0.0687781850	-0.0542232950	-0.0709097900	-0.0607690600	-0.0724320550	-0.0673977650	-0.0731297350	-0.0736779450	-0.0742425450	-0.0802169800	-0.0745709800	-0.0873946100	-0.0742556950	-0.0949333300	-0.0728495900	-0.1027647500	-0.0702882400	-0.1102028000	-0.0664740100	-0.1167645500	-0.0610066750	-0.1226954500	-0.0552114650	-0.1274025500	-0.0483526800	-0.1308342000	-0.0400595700	-0.1335003500	-0.0308889950	-0.1345495500	-0.0211540650	-0.1345205000	-0.0118261150	-0.1337684500	-0.0023485755	-0.1314879500	0.0068456020	-0.1284931500	0.0160072750
0.0022495920	-0.0697487850	-0.0107685600	-0.0718052650	-0.0244496600	-0.0736121700	-0.0352229700	-0.0744652150	-0.0435818500	-0.0740037750	-0.0503122450	-0.0748243600	-0.0572395050	-0.0755585300	-0.0638325650	-0.0767052500	-0.0705959900	-0.0760856150	-0.0771483550	-0.0754166100	-0.0838244150	-0.0749807950	-0.0909098200	-0.0740273700	-0.0981901900	-0.0720385650	-0.1053118500	-0.0678619500	-0.1123776500	-0.0629911850	-0.1186441000	-0.0567165550	-0.1244041500	-0.0500807700	-0.1291898000	-0.0428797900	-0.1321511000	-0.0343383000	-0.1332149500	-0.0247467800	-0.1329210500	-0.0147949550	-0.1315156500	-0.0055240840	-0.1297996500	0.0037989260	-0.1281907000	0.0130092500	-0.1249989500	0.0215389250
0.0038725050	-0.1192183500	-0.0076690325	-0.1194296000	-0.0188601750	-0.1183072500	-0.0278243600	-0.1170970500	-0.0342667200	-0.1161272500	-0.0396683450	-0.1139982500	-0.0444676400	-0.1094105000	-0.0499862900	-0.1048666500	-0.0541457500	-0.0981191250	-0.0585500900	-0.0923131050	-0.0624844900	-0.0851321000	-0.0668351650	-0.0788275200	-0.0704360350	-0.0717023000	-0.0759558550	-0.0659173500	-0.0819233500	-0.0590331600	-0.0868454150	-0.0520280200	-0.0914671300	-0.0431302650	-0.0968416400	-0.0338397050	-0.1019711500	-0.0237646700	-0.1066389000	-0.0138489750	-0.1105223000	-0.0041035710	-0.1125688500	0.0059325600	-0.1137549500	0.0154536200	-0.1128529000	0.0253761600	-0.1119299500	0.0351653150
0.0034911950	-0.1074795500	-0.0066143500	-0.1069555000	-0.0160209350	-0.1046911500	-0.0223460750	-0.1000245650	-0.0259719450	-0.0946171000	-0.0294168600	-0.0889687450	-0.0334674650	-0.0830233150	-0.0385600700	-0.0780968500	-0.0434187150	-0.0731423600	-0.0480618400	-0.0687385500	-0.0543067300	-0.0659770700	-0.0614405300	-0.0632269650	-0.0687853900	-0.0595925600	-0.0762771000	-0.0556167200	-0.0841273550	-0.0520423100	-0.0918575250	-0.0494797900	-0.1010869000	-0.0469596000	-0.1086722500	-0.0410339700	-0.1161150000	-0.0342283050	-0.1217628500	-0.0261019150	-0.1273287000	-0.0184571750	-0.1304715000	-0.0094409415	-0.1334173000	-0.0004757192	-0.1340957500	0.0086844525	-0.1333360000	0.0177668900
0.0032593005	-0.1003404250	-0.0092911905	-0.1001506800	-0.0216378000	-0.0985183750	-0.0320994000	-0.0979909950	-0.0403153800	-0.0965353050	-0.0481836950	-0.0959054200	-0.0558523400	-0.0941395050	-0.0631600800	-0.0911548700	-0.0704166800	-0.0876442050	-0.0762544100	-0.0832738000	-0.0821787700	-0.0782155450	-0.0881830400	-0.0727447450	-0.0950976400	-0.0678581000	-0.1004593050	-0.0612111800	-0.1060064500	-0.0541786150	-0.1113712000	-0.0484301000	-0.1160184000	-0.0412512450	-0.1191330000	-0.0329170350	-0.1216084500	-0.0241568250	-0.1230030000	-0.0155658850	-0.1252202000	-0.0066428070	-0.1264892500	0.0031200880	-0.1262495500	0.0131104200	-0.1252199500	0.0227356650	-0.1219227500	0.0316525300
0.0025791935	-0.0794029900	-0.0127149800	-0.0787353900	-0.0275288000	-0.0800726800	-0.0391832700	-0.0807800050	-0.0472609250	-0.0818353950	-0.0536382750	-0.0856555450	-0.0604707350	-0.0864255350	-0.0671523200	-0.0851416500	-0.0722650900	-0.0809050650	-0.0768970200	-0.0766058400	-0.0829780700	-0.0733271200	-0.0898849100	-0.0710928350	-0.0956203800	-0.0662425100	-0.1009827600	-0.0607217100	-0.1041800000	-0.0533663700	-0.1079108000	-0.0473088150	-0.1136538000	-0.0412359700	-0.1214831500	-0.0371230350	-0.1280966500	-0.0311590900	-0.1327861000	-0.0240090400	-0.1355355500	-0.0161155700	-0.1354456500	-0.0071077455	-0.1335799000	0.0021589360	-0.1304149500	0.0111024250	-0.1274991000	0.0199432900
0.0032269740	-0.0993455950	-0.0089116945	-0.0981117800	-0.0208277650	-0.0953025800	-0.0305537000	-0.0922314600	-0.0375786600	-0.0893405500	-0.0441214600	-0.0852671600	-0.0516917450	-0.0819262650	-0.0587126200	-0.0774769900	-0.0655764650	-0.0723904550	-0.0717055050	-0.0673139200	-0.0785155700	-0.0627441500	-0.0850655800	-0.0579117450	-0.0919623250	-0.0531969700	-0.0985365950	-0.0484297800	-0.1043790500	-0.0422736100	-0.1094665500	-0.0363782000	-0.1152263000	-0.0293248950	-0.1199152500	-0.0214939750	-0.1240101500	-0.0125961650	-0.1263326000	-0.0035021815	-0.1295607000	0.0040843410	-0.1311591000	0.0118264680	-0.1310263500	0.0189814800	-0.1298017000	0.0260444400	-0.1290249500	0.0326383000
0.0021193050	-0.0652446000	-0.0109690350	-0.0663791250	-0.0242858100	-0.0675204050	-0.0358287700	-0.0682237500	-0.0448204200	-0.0689205950	-0.0529840750	-0.0691937900	-0.0613733350	-0.0677170000	-0.0696593650	-0.0659723450	-0.0778985100	-0.0646783850	-0.0851014300	-0.0630518100	-0.0923248400	-0.0601529000	-0.0998316900	-0.0578106350	-0.1070285500	-0.0549173250	-0.1134389500	-0.0510889700	-0.1187220000	-0.0456791700	-0.1231271000	-0.0408490050	-0.1278437000	-0.0353814100	-0.1310996000	-0.0293158500	-0.1331552500	-0.0225807900	-0.1348424000	-0.0153210350	-0.1362815000	-0.0078442590	-0.1349749500	0.0003351740	-0.1330576500	0.0085523800	-0.1307647000	0.0165867000	-0.1278604000	0.0241867150
0.0031288785	-0.0963259150	-0.0102132450	-0.0969089900	-0.0233280650	-0.0970289250	-0.0341758750	-0.0964681800	-0.0423511400	-0.0963866250	-0.0498575150	-0.0949621200	-0.0573963800	-0.0938069550	-0.0647437650	-0.0933220400	-0.0715648150	-0.0906470400	-0.0778033800	-0.0885479400	-0.0834950700	-0.0842679800	-0.0891776150	-0.0796295800	-0.0940490700	-0.0732168250	-0.0985825100	-0.0660180150	-0.1037968500	-0.0590184750	-0.1069620000	-0.0514408950	-0.1098706000	-0.0421507100	-0.1118894500	-0.0318660000	-0.1152522000	-0.0211567650	-0.1186624500	-0.0109086420	-0.1198238500	-0.0006681380	-0.1207881000	0.0095462235	-0.1207513000	0.0193545350	-0.1208201000	0.0288448850	-0.1192187500	0.0380064500
0.0034901300	-0.1074476000	-0.0073291970	-0.1072169000	-0.0176108600	-0.1041943500	-0.0264540050	-0.1020774500	-0.0330638050	-0.1016395500	-0.0391232050	-0.1016712000	-0.0451632700	-0.1010740500	-0.0506720500	-0.0982076650	-0.0562049700	-0.0941971400	-0.0611877050	-0.0897752600	-0.0672147250	-0.0856606450	-0.0727896350	-0.0802490300	-0.0786332100	-0.0740325900	-0.0839659400	-0.0667752350	-0.0889677750	-0.0584644200	-0.0942735850	-0.0512246550	-0.1000925450	-0.0426073100	-0.1061966000	-0.0338845100	-0.1126017000	-0.0250549550	-0.1173120500	-0.0158068500	-0.1209611000	-0.0065179095	-0.1220627500	0.0036410795	-0.1221311000	0.0138286250	-0.1219348000	0.0237060100	-0.1207609000	0.0332329900
0.0023326830	-0.0718144500	-0.0111815350	-0.0731779300	-0.0247684700	-0.0748364350	-0.0360975550	-0.0767083050	-0.0448441250	-0.0785191200	-0.0528319100	-0.0796994250	-0.0605719300	-0.0799840400	-0.0678186250	-0.0792587000	-0.0744338700	-0.0765670400	-0.0803348450	-0.0738326600	-0.0868712250	-0.0717152500	-0.0932013450	-0.0691104500	-0.0989441550	-0.0651329300	-0.1045001500	-0.0606033550	-0.1100285000	-0.0555175350	-0.1144632000	-0.0502632150	-0.1196617500	-0.0445322400	-0.1243516000	-0.0382117150	-0.1279806000	-0.0309817800	-0.1306850500	-0.0232494600	-0.1325757000	-0.0153739850	-0.1332499000	-0.0068221405	-0.1334808000	0.0019000940	-0.1321215500	0.0105016395	-0.1296909500	0.0188482600
0.0016567685	-0.0510056450	-0.0136059500	-0.0533786500	-0.0286142850	-0.0565828750	-0.0404923450	-0.0607767400	-0.0495523850	-0.0641203700	-0.0572265000	-0.0674180300	-0.0640096000	-0.0714923900	-0.0704689450	-0.0744533950	-0.0765124650	-0.0754988350	-0.0817420150	-0.0753942150	-0.0867382100	-0.0741567200	-0.0907998300	-0.0706655750	-0.0954380700	-0.0668965600	-0.0997724950	-0.0627690300	-0.1050862000	-0.0589873550	-0.1107345000	-0.0561828800	-0.1171155500	-0.0521067200	-0.1224261000	-0.0462085850	-0.1277922500	-0.0398962050	-0.1316171500	-0.0327748800	-0.1343979500	-0.0251352700	-0.1347427500	-0.0163869350	-0.1339069000	-0.0071323970	-0.1311536000	0.0017788529	-0.1273760000	0.0104033380
0.0017157975	-0.0528230500	-0.0127451600	-0.0547623650	-0.0265586700	-0.0586644350	-0.0373976800	-0.0636706200	-0.0450604250	-0.0687968450	-0.0516348800	-0.0733975200	-0.0584373000	-0.0758470450	-0.0648695900	-0.0763346250	-0.0708405700	-0.0744393550	-0.0763999750	-0.0732758500	-0.0827323400	-0.0733809800	-0.0889740600	-0.0724826850	-0.0942162600	-0.0691437450	-0.0982599150	-0.0640903750	-0.1029196000	-0.0593039800	-0.1086563500	-0.0563784300	-0.1154158000	-0.0526117850	-0.1210785500	-0.0466690150	-0.1261336500	-0.0391517050	-0.1311375500	-0.0316898500	-0.1344808500	-0.0237655950	-0.1360531000	-0.0149821650	-0.1356760000	-0.0061345875	-0.1333184500	0.0024269735	-0.1295569500	0.0109904400
0.0039986555	-0.1231031000	-0.0067421930	-0.1206100500	-0.0185691800	-0.1181578500	-0.0288334900	-0.1153972500	-0.0368950900	-0.1134304500	-0.0441893700	-0.1112171000	-0.0513639300	-0.1083245500	-0.0578429150	-0.1054585000	-0.0636079350	-0.1012622500	-0.0685576850	-0.0964743400	-0.0723339400	-0.0897421100	-0.0765281850	-0.0830779200	-0.0811971200	-0.0758780900	-0.0851363050	-0.0678986000	-0.0893990000	-0.0589917600	-0.0919973300	-0.0501245450	-0.0969463150	-0.0408536050	-0.0995486800	-0.0306462850	-0.1017658500	-0.0198120350	-0.1028719500	-0.0084529263	-0.1031605800	0.0027963560	-0.1015133700	0.0137186210	-0.0979353150	0.0244705550	-0.0951694750	0.0350252450	-0.0925636150	0.0447794400
0.0023832810	-0.0733723600	-0.0102587595	-0.0750287200	-0.0229459350	-0.0752389000	-0.0337912700	-0.0745940050	-0.0423034600	-0.0746533850	-0.0500411300	-0.0751301150	-0.0579210050	-0.0753530650	-0.0654485000	-0.0745988300	-0.0724351800	-0.0725084750	-0.0791215550	-0.0713152150	-0.0860885150	-0.0701340650	-0.0931096300	-0.0687528700	-0.0995818550	-0.0657746550	-0.1055875000	-0.0620205900	-0.1109793500	-0.0572088800	-0.1153151000	-0.0521654550	-0.1197562500	-0.0456364750	-0.1242921000	-0.0386117350	-0.1289020000	-0.0310316250	-0.1325345500	-0.0232217250	-0.1337826000	-0.0147324300	-0.1349158000	-0.0055782980	-0.1345372000	0.0038191340	-0.1330608000	0.0130707800	-0.1310463500	0.0220484600
0.0022280965	-0.0685951600	-0.0086426840	-0.0699093900	-0.0204593200	-0.0697808000	-0.0305945600	-0.0703361350	-0.0385704200	-0.0718596850	-0.0455487400	-0.0721844150	-0.0525408600	-0.0712457950	-0.0594686550	-0.0684421200	-0.0665708750	-0.0649969750	-0.0737633200	-0.0623965150	-0.0813200450	-0.0593208300	-0.0887887750	-0.0557580100	-0.0960277300	-0.0517415250	-0.1035006000	-0.0484471950	-0.1114498500	-0.0462795400	-0.1184343000	-0.0450894750	-0.1260245000	-0.0435309950	-0.1320602000	-0.0389915000	-0.1370024500	-0.0329121800	-0.1407317500	-0.0261805000	-0.1424025500	-0.0188569300	-0.1413743000	-0.0103847355	-0.1389890000	-0.0011717277	-0.1367286000	0.0083656600	-0.1335805000	0.0177198500
0.0028914415	-0.0890171650	-0.0090528530	-0.0902994550	-0.0208553000	-0.0930110700	-0.0308296500	-0.0943124150	-0.0386959250	-0.0943802150	-0.0459498900	-0.0933538900	-0.0531936300	-0.0915619100	-0.0601650900	-0.0896111350	-0.0671936400	-0.0874506250	-0.0733112100	-0.0844599150	-0.0796041150	-0.0807236200	-0.0856484150	-0.0761599950	-0.0918305650	-0.0713579300	-0.0978342650	-0.0664814650	-0.1035107600	-0.0606001900	-0.1084306000	-0.0550970000	-0.1133333500	-0.0482589000	-0.1167452500	-0.0400009250	-0.1199611000	-0.0308809450	-0.1218954500	-0.0214539400	-0.1227055000	-0.0119787555	-0.1229405500	-0.0019112834	-0.1224375500	0.0081696975	-0.1219193500	0.0178334000	-0.1199796500	0.0271087200
0.0040716225	-0.1253507500	-0.0050120625	-0.1237267000	-0.0143137500	-0.1200660500	-0.0224492100	-0.1169161000	-0.0286838250	-0.1138741000	-0.0345059400	-0.1107627000	-0.0401792900	-0.1066049500	-0.0456039100	-0.1019786500	-0.0513595900	-0.0973959050	-0.0576514450	-0.0939349100	-0.0636340200	-0.0890106200	-0.0688379700	-0.0827776550	-0.0740057750	-0.0755386350	-0.0790075350	-0.0677051900	-0.0847049250	-0.0596992650	-0.0886354500	-0.0516075100	-0.0926273050	-0.0422317850	-0.0970457000	-0.0323618150	-0.0999646150	-0.0213137750	-0.1041477000	-0.0109718070	-0.1076047500	-0.0008773630	-0.1095887500	0.0094515420	-0.1096006500	0.0195079150	-0.1114924500	0.0287286150	-0.1113937000	0.0374229550
0.0031724875	-0.0976699650	-0.0085943655	-0.0996140700	-0.0200661100	-0.1017941500	-0.0300696400	-0.1030922000	-0.0379090300	-0.1053846500	-0.0448766400	-0.1065188500	-0.0513023150	-0.1069813000	-0.0571232100	-0.1063740500	-0.0622418350	-0.1045682500	-0.0670278100	-0.1032157500	-0.0711375800	-0.0993740750	-0.0747073000	-0.0940577700	-0.0784368100	-0.0875564800	-0.0809315450	-0.0797763150	-0.0848294800	-0.0714001750	-0.0872287500	-0.0630914850	-0.0895710800	-0.0533752400	-0.0928272050	-0.0432095200	-0.0949166750	-0.0314624200	-0.0966184900	-0.0197888950	-0.0987306700	-0.0084708050	-0.0995528000	0.0028779170	-0.1007874500	0.0139219800	-0.1007584800	0.0251340400	-0.0995485650	0.0360880650
0.0036596610	-0.1126684500	-0.0095268660	-0.1128182500	-0.0212883800	-0.1145854500	-0.0293701150	-0.1130148000	-0.0336694200	-0.1076907000	-0.0381339000	-0.1017797950	-0.0429145100	-0.0959007900	-0.0466406400	-0.0905522550	-0.0500465350	-0.0845086650	-0.0519364450	-0.0783977250	-0.0554010750	-0.0716661600	-0.0601553850	-0.0656131250	-0.0663496850	-0.0596604250	-0.0737524300	-0.0545148150	-0.0818467050	-0.0488523600	-0.0904603450	-0.0456557800	-0.1003353800	-0.0417880050	-0.1085452000	-0.0352021550	-0.1159322000	-0.0276738100	-0.1223828500	-0.0198776200	-0.1269169500	-0.0114211215	-0.1286318000	-0.0017793254	-0.1296460500	0.0080958450	-0.1289047000	0.0177570050	-0.1274456500	0.0268891150
0.0027364110	-0.0842447700	-0.0093079000	-0.0856492050	-0.0215101750	-0.0875917500	-0.0319459400	-0.0881234650	-0.0400190000	-0.0890145700	-0.0474056800	-0.0880999000	-0.0546392550	-0.0860105700	-0.0616395750	-0.0835233100	-0.0684885050	-0.0810023700	-0.0744694150	-0.0796402950	-0.0806856600	-0.0767921800	-0.0868233600	-0.0726879500	-0.0929867100	-0.0681627850	-0.0994320300	-0.0636984650	-0.1056730500	-0.0582544550	-0.1105103000	-0.0524395000	-0.1154970500	-0.0451386550	-0.1208731000	-0.0377678700	-0.1254735000	-0.0294942750	-0.1288716500	-0.0210002000	-0.1308343500	-0.0121779900	-0.1318134500	-0.0027418220	-0.1308643000	0.0067220795	-0.1286513000	0.0159345950	-0.1261977000	0.0249970000
0.0031620585	-0.0973490350	-0.0082365115	-0.0981776050	-0.0194343000	-0.0955535150	-0.0290913500	-0.0930729400	-0.0363507050	-0.0903117050	-0.0427813900	-0.0867472000	-0.0491082350	-0.0822200200	-0.0559730500	-0.0784317300	-0.0633879950	-0.0748504750	-0.0706275150	-0.0723987650	-0.0785027100	-0.0699199150	-0.0865846450	-0.0674081250	-0.0944276400	-0.0648623400	-0.1020266500	-0.0625489950	-0.1089502500	-0.0586189750	-0.1149737000	-0.0544646300	-0.1211445000	-0.0490797450	-0.1259978000	-0.0422942350	-0.1290490000	-0.0339049250	-0.1311268500	-0.0255459000	-0.1307396500	-0.0166798700	-0.1291826000	-0.0069759605	-0.1264405500	0.0029321940	-0.1219005000	0.0120380450	-0.1177940000	0.0210519750
0.0020315205	-0.0625437550	-0.0114605650	-0.0630706850	-0.0247754300	-0.0648305150	-0.0355810050	-0.0681166100	-0.0441336600	-0.0707860700	-0.0523105650	-0.0717739550	-0.0604991700	-0.0718566350	-0.0684482900	-0.0721437600	-0.0760748450	-0.0717240800	-0.0828453100	-0.0709317200	-0.0897241000	-0.0701790650	-0.0962646700	-0.0686887300	-0.1023058500	-0.0662665200	-0.1073716000	-0.0623279550	-0.1130860000	-0.0586065150	-0.1176380500	-0.0544100300	-0.1223814000	-0.0490384150	-0.1258608500	-0.0423121800	-0.1293939000	-0.0350822000	-0.1323254000	-0.0279124200	-0.1336764500	-0.0202043600	-0.1332712000	-0.0114371350	-0.1326526000	-0.0022479645	-0.1312719500	0.0068737410	-0.1285692000	0.0156805400
0.0042121875	-0.1296794000	-0.0035491285	-0.1277510500	-0.0115737650	-0.1233584500	-0.0188740700	-0.1194379500	-0.0249935100	-0.1161370500	-0.0306297750	-0.1126383000	-0.0361039200	-0.1076419500	-0.0415971700	-0.1026270000	-0.0468970950	-0.0973373600	-0.0516131400	-0.0923560100	-0.0555957700	-0.0857447850	-0.0585774000	-0.0780098500	-0.0622401450	-0.0696753150	-0.0656066600	-0.0608131450	-0.0694079450	-0.0516821750	-0.0731402650	-0.0439875350	-0.0782534150	-0.0364934300	-0.0841069400	-0.0283202350	-0.0890073000	-0.0199746150	-0.0940996250	-0.0110484810	-0.0973279000	-0.0008605257	-0.0999017400	0.0101441360	-0.1019670500	0.0210501700	-0.1045703000	0.0312388750	-0.1074580000	0.0403744900
0.0015552800	-0.0478820600	-0.0122865400	-0.0503743850	-0.0258119200	-0.0557487000	-0.0371538950	-0.0611818100	-0.0456114250	-0.0662826650	-0.0531765400	-0.0707099600	-0.0605105100	-0.0741599650	-0.0668448000	-0.0773911300	-0.0734481300	-0.0793497450	-0.0796466550	-0.0810496600	-0.0859781350	-0.0819029250	-0.0921881650	-0.0814719400	-0.0977632600	-0.0794804900	-0.1022171000	-0.0749921800	-0.1071129500	-0.0699922850	-0.1108066000	-0.0645744250	-0.1143169500	-0.0574430550	-0.1195219500	-0.0507344050	-0.1237873000	-0.0427305000	-0.1267747500	-0.0341992100	-0.1278010000	-0.0250092950	-0.1279830000	-0.0146964350	-0.1276175500	-0.0040941520	-0.1264741500	0.0064013025	-0.1235108000	0.0166222650
0.0017752510	-0.0546542850	-0.0112222400	-0.0563764300	-0.0238920100	-0.0606052650	-0.0340722050	-0.0647450850	-0.0424968300	-0.0669280850	-0.0506319100	-0.0675986950	-0.0586010550	-0.0682633250	-0.0660874650	-0.0684058100	-0.0731839100	-0.0689008800	-0.0792733450	-0.0702347050	-0.0847352300	-0.0704802750	-0.0899770950	-0.0692069200	-0.0946309950	-0.0670754150	-0.1001308550	-0.0647774050	-0.1060503500	-0.0614464100	-0.1119380500	-0.0595424650	-0.1180419000	-0.0557849150	-0.1235420000	-0.0506513150	-0.1283108000	-0.0443445100	-0.1307831500	-0.0365913150	-0.1327528500	-0.0283253250	-0.1328610500	-0.0189437400	-0.1329357500	-0.0091637920	-0.1312199000	0.0002716375	-0.1279640500	0.0090532875
0.0015043275	-0.0463135900	-0.0118535350	-0.0470652850	-0.0242580850	-0.0520928300	-0.0346366250	-0.0567266450	-0.0421916000	-0.0616799100	-0.0491911750	-0.0659382250	-0.0562092300	-0.0693444550	-0.0630112050	-0.0717056800	-0.0693807850	-0.0731551550	-0.0752681050	-0.0747751350	-0.0815074600	-0.0750098350	-0.0876692750	-0.0744752900	-0.0932388100	-0.0718588500	-0.0988474850	-0.0688059300	-0.1047543000	-0.0651406850	-0.1103422000	-0.0617052850	-0.1155119500	-0.0559292550	-0.1207590000	-0.0493142950	-0.1255708000	-0.0415957100	-0.1295693500	-0.0335253500	-0.1328289000	-0.0253750100	-0.1341583500	-0.0164615500	-0.1333959500	-0.0071141315	-0.1315764500	0.0023352465	-0.1297148500	0.0117735550
0.0043471630	-0.1338354500	-0.0046210465	-0.1323821000	-0.0129309650	-0.1276958500	-0.0191138050	-0.1227056500	-0.0250038000	-0.1187775500	-0.0306428150	-0.1144956500	-0.0354115900	-0.1083757000	-0.0401563800	-0.1023155450	-0.0458068850	-0.0964831700	-0.0489947750	-0.0904878800	-0.0535994300	-0.0837677350	-0.0581241400	-0.0764060700	-0.0615232950	-0.0688633000	-0.0663452650	-0.0613903450	-0.0714967950	-0.0526696900	-0.0771834400	-0.0453571100	-0.0831348050	-0.0377861150	-0.0902903250	-0.0302504600	-0.0956893150	-0.0206044900	-0.1016570800	-0.0119458550	-0.1071778000	-0.0036210100	-0.1092092000	0.0062745740	-0.1126390500	0.0156527950	-0.1144108500	0.0245407850	-0.1145544500	0.0333142650
0.0035802260	-0.1102240500	-0.0073106470	-0.1098022500	-0.0178793900	-0.1069189000	-0.0266583900	-0.1039752000	-0.0329803400	-0.1018479900	-0.0387061950	-0.0994449850	-0.0450901800	-0.0981218300	-0.0508774150	-0.0957086200	-0.0561372400	-0.0923252600	-0.0616430950	-0.0890862600	-0.0674541400	-0.0856205400	-0.0732849700	-0.0827560900	-0.0767221100	-0.0768830400	-0.0808334400	-0.0701197150	-0.0841265250	-0.0617053750	-0.0874572150	-0.0539731050	-0.0905845750	-0.0447921750	-0.0936676700	-0.0353859500	-0.0975077450	-0.0253362500	-0.1001555600	-0.0144849450	-0.1020473500	-0.0045211665	-0.1032651500	0.0062517120	-0.1038150000	0.0165495250	-0.1031003000	0.0265435600	-0.1012588700	0.0363219850
0.0024453930	-0.0752860450	-0.0098904580	-0.0756016950	-0.0216645200	-0.0725628050	-0.0307772100	-0.0676626300	-0.0387900650	-0.0658710150	-0.0465176350	-0.0656335800	-0.0538307700	-0.0655669100	-0.0604258500	-0.0649532000	-0.0679402200	-0.0643632650	-0.0750372150	-0.0645676850	-0.0822813700	-0.0655328000	-0.0893232800	-0.0673084500	-0.0958132350	-0.0676219100	-0.1017091950	-0.0654836350	-0.1078774000	-0.0631557450	-0.1125313000	-0.0592645750	-0.1180525000	-0.0546422150	-0.1232832000	-0.0492925350	-0.1267582500	-0.0418535700	-0.1294479000	-0.0337855650	-0.1304949500	-0.0251563850	-0.1317084500	-0.0158831500	-0.1313760000	-0.0060695000	-0.1305935000	0.0038037990	-0.1282727000	0.0134123100
0.0029565965	-0.0910247300	-0.0100966190	-0.0898714700	-0.0229210800	-0.0864126900	-0.0335022300	-0.0829055100	-0.0417252350	-0.0805689650	-0.0495591450	-0.0799457400	-0.0571786650	-0.0798679600	-0.0645475050	-0.0788774550	-0.0717892500	-0.0767177100	-0.0782453150	-0.0742309600	-0.0847654950	-0.0711131850	-0.0914136750	-0.0670932350	-0.0979187150	-0.0625248800	-0.1039635500	-0.0571797200	-0.1106888000	-0.0519509900	-0.1164938500	-0.0466647200	-0.1227167000	-0.0401486250	-0.1283435500	-0.0329571150	-0.1332576500	-0.0255796400	-0.1359520500	-0.0175772500	-0.1375762000	-0.0094382570	-0.1372968000	-0.0008250490	-0.1352707000	0.0072484180	-0.1310220000	0.0145726200	-0.1274635500	0.0222489300
0.0019558540	-0.0602149500	-0.0100710045	-0.0622101150	-0.0215912900	-0.0661703300	-0.0308994000	-0.0703022450	-0.0382172400	-0.0728696550	-0.0451877250	-0.0728796050	-0.0524017150	-0.0709722250	-0.0596440500	-0.0699847150	-0.0669715950	-0.0696279850	-0.0737588300	-0.0700947550	-0.0805066150	-0.0697017050	-0.0870008000	-0.0711488250	-0.0928734350	-0.0722935200	-0.0984119250	-0.0707851550	-0.1044153500	-0.0683150800	-0.1093773500	-0.0645315700	-0.1151020000	-0.0595564350	-0.1201887500	-0.0533179900	-0.1233448000	-0.0448633800	-0.1269866000	-0.0363141250	-0.1292694500	-0.0273666800	-0.1306681000	-0.0175645550	-0.1303871000	-0.0074431670	-0.1292229500	0.0024919665	-0.1268229500	0.0122847000
0.0043899675	-0.1351541500	-0.0040099820	-0.1326713000	-0.0120837400	-0.1288879500	-0.0183937300	-0.1256090000	-0.0230031200	-0.1226085000	-0.0263833100	-0.1189475500	-0.0309500450	-0.1146771500	-0.0359685900	-0.1098884000	-0.0418627250	-0.1044796500	-0.0460172300	-0.0978141150	-0.0517386450	-0.0908467950	-0.0570807100	-0.0832962950	-0.0629625100	-0.0752207650	-0.0677220300	-0.0662380250	-0.0721759950	-0.0569422100	-0.0740140700	-0.0485721050	-0.0770280550	-0.0388337600	-0.0801207200	-0.0285867850	-0.0843816350	-0.0189552000	-0.0894323050	-0.0098213270	-0.0950609500	-0.0015905365	-0.0985334050	0.0069969935	-0.0996462950	0.0167534305	-0.0999102950	0.0264575700	-0.0996682400	0.0358719400
0.0040007590	-0.1231715500	-0.0071928295	-0.1233891000	-0.0179023000	-0.1240512000	-0.0262143300	-0.1230842000	-0.0322339950	-0.1228820500	-0.0371028350	-0.1214412500	-0.0413785000	-0.1181699000	-0.0450875550	-0.1141076000	-0.0481417050	-0.1082451500	-0.0508078750	-0.1023454000	-0.0522493050	-0.0948237700	-0.0548220100	-0.0869816700	-0.0564685950	-0.0778130400	-0.0564830000	-0.0679245600	-0.0582253450	-0.0575511150	-0.0598436450	-0.0482162850	-0.0646913400	-0.0388176800	-0.0704208050	-0.0290021350	-0.0776348100	-0.0191719700	-0.0837335900	-0.0088745620	-0.0902797800	0.0005770412	-0.0950839000	0.0109702535	-0.0988017600	0.0213852300	-0.1023903000	0.0308776050	-0.1046280500	0.0394778900
0.0034614245	-0.1065675000	-0.0052759500	-0.1079521500	-0.0143070800	-0.1092231500	-0.0214869350	-0.1106384500	-0.0271937600	-0.1110081500	-0.0321854050	-0.1085647500	-0.0371474950	-0.1040782500	-0.0429235000	-0.0997953900	-0.0491793050	-0.0950002750	-0.0542113550	-0.0895806600	-0.0598669900	-0.0837032650	-0.0656741100	-0.0780658450	-0.0714724300	-0.0720900900	-0.0773074150	-0.0653991800	-0.0832806350	-0.0583421000	-0.0886956900	-0.0520444300	-0.0938272200	-0.0444525300	-0.0987572900	-0.0361718350	-0.1027584250	-0.0262817250	-0.1062017500	-0.0168903550	-0.1101234500	-0.0079342305	-0.1122046000	0.0013153630	-0.1119736500	0.0114716615	-0.1112745000	0.0217554150	-0.1097028500	0.0318074050
0.0020029905	-0.0616663900	-0.0111196100	-0.0643809000	-0.0243956050	-0.0680339050	-0.0356075750	-0.0710609750	-0.0445607300	-0.0721271600	-0.0531127350	-0.0720675400	-0.0615957100	-0.0726674500	-0.0695876650	-0.0740709150	-0.0770464250	-0.0755863350	-0.0835697200	-0.0762517800	-0.0898401600	-0.0750836700	-0.0959988600	-0.0729218950	-0.1019369700	-0.0697460700	-0.1074623500	-0.0663230600	-0.1125605500	-0.0620938350	-0.1150726500	-0.0566232300	-0.1177977500	-0.0498956000	-0.1214977000	-0.0432025800	-0.1249686500	-0.0355319750	-0.1275279500	-0.0274395550	-0.1296121500	-0.0192305200	-0.1308254000	-0.0104255265	-0.1301789000	-0.0012807605	-0.1294302000	0.0078523715	-0.1269192000	0.0165829200
0.0040429610	-0.1244709500	-0.0068588010	-0.1230309000	-0.0167712400	-0.1208206500	-0.0242530400	-0.1186007000	-0.0301008050	-0.1170155500	-0.0351155000	-0.1158319000	-0.0392005200	-0.1121153500	-0.0435199900	-0.1080984000	-0.0471631850	-0.1021267600	-0.0497910800	-0.0957814900	-0.0537125100	-0.0890578350	-0.0574440000	-0.0820358400	-0.0600956750	-0.0741540000	-0.0620895750	-0.0658919200	-0.0632570950	-0.0569431400	-0.0646452050	-0.0488619050	-0.0695882950	-0.0405329850	-0.0751299150	-0.0324082850	-0.0802909050	-0.0228289350	-0.0834525550	-0.0122013555	-0.0871734900	-0.0023348180	-0.0890554350	0.0082878295	-0.0904446400	0.0188644400	-0.0927920800	0.0291627150	-0.0947856700	0.0389949800
0.0023002750	-0.0708190350	-0.0129751100	-0.0710524100	-0.0279506200	-0.0725238600	-0.0401331300	-0.0756185650	-0.0496085300	-0.0775017500	-0.0583265850	-0.0784112550	-0.0667018850	-0.0788382400	-0.0744457100	-0.0776761150	-0.0818939950	-0.0761840700	-0.0885875200	-0.0743688100	-0.0953574650	-0.0724753800	-0.1014482000	-0.0694551550	-0.1070049500	-0.0658596500	-0.1113172500	-0.0612893850	-0.1159967500	-0.0573345800	-0.1195823000	-0.0532432000	-0.1233931500	-0.0483102750	-0.1257445500	-0.0417137550	-0.1283810000	-0.0340227450	-0.1290586000	-0.0254907150	-0.1283995000	-0.0166292900	-0.1268610500	-0.0067466215	-0.1247861000	0.0034042640	-0.1230451000	0.0133691850	-0.1216249500	0.0228830950
0.0034467355	-0.1061153500	-0.0056802540	-0.1088607500	-0.0152096650	-0.1101090000	-0.0230043400	-0.1120083500	-0.0295686200	-0.1109356500	-0.0357917750	-0.1095853500	-0.0418102600	-0.1061662500	-0.0476848050	-0.1021645500	-0.0538519150	-0.0972371100	-0.0593146000	-0.0924463900	-0.0639422300	-0.0858523750	-0.0691019400	-0.0793132150	-0.0746587750	-0.0720884850	-0.0809172900	-0.0652552950	-0.0873530400	-0.0574913150	-0.0925076250	-0.0498801250	-0.0991100800	-0.0414063500	-0.1051050500	-0.0319593600	-0.1102205500	-0.0215788350	-0.1150459500	-0.0117778150	-0.1184134000	-0.0022755340	-0.1193240500	0.0080768515	-0.1200689500	0.0181899200	-0.1196088000	0.0276440250	-0.1187684500	0.0361577000
0.0037096760	-0.1142107500	-0.0058561440	-0.1141752500	-0.0147864550	-0.1149536500	-0.0220584200	-0.1167411000	-0.0282107000	-0.1158669500	-0.0343371600	-0.1141414500	-0.0401204550	-0.1100176000	-0.0461274600	-0.1057596000	-0.0517789800	-0.0997695800	-0.0566679500	-0.0935006850	-0.0626261050	-0.0870249450	-0.0684577100	-0.0800906600	-0.0734398000	-0.0717509250	-0.0779739600	-0.0628738400	-0.0830820850	-0.0536294250	-0.0881081700	-0.0450685250	-0.0941271500	-0.0353416450	-0.0989502850	-0.0247271700	-0.1037249000	-0.0140503200	-0.1098477000	-0.0050738325	-0.1153375000	0.0034289290	-0.1183380500	0.0124466900	-0.1193837500	0.0212185000	-0.1214135500	0.0294313950	-0.1197238000	0.0371412350
0.0029414300	-0.0905586450	-0.0106468900	-0.0893917350	-0.0241570200	-0.0878642700	-0.0349369550	-0.0849892900	-0.0427122150	-0.0818971000	-0.0502088000	-0.0801020400	-0.0577107900	-0.0802108000	-0.0647793550	-0.0806334000	-0.0717337750	-0.0791355250	-0.0777328500	-0.0768676300	-0.0836773900	-0.0735463000	-0.0900944000	-0.0700816950	-0.0964406750	-0.0663502900	-0.1024046000	-0.0623048250	-0.1082470500	-0.0571137600	-0.1130214000	-0.0520316700	-0.1184413500	-0.0459103900	-0.1224827000	-0.0385027500	-0.1256622000	-0.0304784250	-0.1285730500	-0.0230631450	-0.1291980000	-0.0150881250	-0.1281479000	-0.0062504255	-0.1267399500	0.0028617370	-0.1248553500	0.0117147700	-0.1226812000	0.0202389100
0.0029519535	-0.0908827700	-0.0084622505	-0.0924817600	-0.0199981000	-0.0939859100	-0.0299957500	-0.0938924350	-0.0378361650	-0.0929618900	-0.0450725700	-0.0915564200	-0.0521492200	-0.0892127100	-0.0594940800	-0.0877031500	-0.0665116900	-0.0854917650	-0.0726920750	-0.0830578300	-0.0790103050	-0.0802489350	-0.0844689800	-0.0755954200	-0.0905620150	-0.0703304300	-0.0966406950	-0.0644458850	-0.1025932000	-0.0576069150	-0.1080062500	-0.0514796750	-0.1142966000	-0.0443963500	-0.1196148000	-0.0363088050	-0.1239160500	-0.0271327700	-0.1267948500	-0.0175468800	-0.1287129500	-0.0079614105	-0.1306473500	0.0017583445	-0.1308721000	0.0112615900	-0.1288062000	0.0202254300	-0.1262523000	0.0289044350
0.0038640705	-0.1189644000	-0.0065530070	-0.1181600000	-0.0173827500	-0.1149318500	-0.0269362150	-0.1119606000	-0.0338386600	-0.1074374000	-0.0412113250	-0.1044690500	-0.0484739700	-0.1003524450	-0.0557279700	-0.0966896250	-0.0624737950	-0.0917651950	-0.0680523750	-0.0868006450	-0.0724619750	-0.0797930700	-0.0778996350	-0.0733174250	-0.0819765950	-0.0652243750	-0.0860911100	-0.0575095100	-0.0895483750	-0.0491189850	-0.0925610750	-0.0411525650	-0.0964291900	-0.0327149750	-0.1023953500	-0.0257769400	-0.1062677500	-0.0173723200	-0.1102801500	-0.0102512095	-0.1135127500	-0.0020815073	-0.1157334000	0.0069012925	-0.1183896000	0.0159390400	-0.1185788500	0.0250230200	-0.1184876000	0.0332220950
0.0022594225	-0.0695615900	-0.0102011155	-0.0700886000	-0.0229640150	-0.0722317150	-0.0333447050	-0.0749566550	-0.0413457600	-0.0765973800	-0.0490396400	-0.0766286050	-0.0569214450	-0.0764414550	-0.0646606750	-0.0758023650	-0.0718277450	-0.0754693600	-0.0783837750	-0.0739951300	-0.0846482650	-0.0710455000	-0.0909230200	-0.0677690900	-0.0960563900	-0.0624891650	-0.1016627150	-0.0574866300	-0.1079174500	-0.0519518200	-0.1135971500	-0.0473487850	-0.1200863000	-0.0419496900	-0.1260450000	-0.0358974400	-0.1314192000	-0.0288136850	-0.1349115500	-0.0213719450	-0.1372407500	-0.0141970450	-0.1366589500	-0.0061279650	-0.1349032500	0.0025980700	-0.1325728000	0.0114370600	-0.1296319500	0.0201025500
0.0038513510	-0.1185730500	-0.0065286375	-0.1193252000	-0.0166998500	-0.1181347000	-0.0251809850	-0.1185158500	-0.0313737200	-0.1189203500	-0.0366910600	-0.1179943000	-0.0415229050	-0.1149227000	-0.0458262800	-0.1108188500	-0.0494681600	-0.1051422500	-0.0522268400	-0.0992173500	-0.0560024100	-0.0924310850	-0.0593881000	-0.0852185550	-0.0625604050	-0.0771183050	-0.0654537100	-0.0687331550	-0.0682106650	-0.0597738000	-0.0711664250	-0.0515014600	-0.0768052550	-0.0429225750	-0.0825985600	-0.0336194500	-0.0897825200	-0.0245580200	-0.0959319750	-0.0153241700	-0.1008135700	-0.0059376620	-0.1032483500	0.0044482865	-0.1047091000	0.0149790750	-0.1046120450	0.0252162100	-0.1022435700	0.0348163700
0.0034371590	-0.1058212500	-0.0099677390	-0.1061306000	-0.0232114750	-0.1057483000	-0.0343836050	-0.1047996500	-0.0429729200	-0.1029717500	-0.0508320950	-0.1005994000	-0.0585074800	-0.0971264300	-0.0660488200	-0.0937677200	-0.0729343500	-0.0893951350	-0.0793196450	-0.0858075000	-0.0850885850	-0.0808569150	-0.0913160850	-0.0765031800	-0.0966231050	-0.0717447500	-0.1003895750	-0.0659398800	-0.1037547000	-0.0593440550	-0.1062076000	-0.0531602300	-0.1088155000	-0.0461195300	-0.1109156500	-0.0379884850	-0.1140983000	-0.0291043200	-0.1158720500	-0.0198360500	-0.1172128000	-0.0107301400	-0.1166866500	-0.0011637339	-0.1156248000	0.0083737300	-0.1141560000	0.0174634600	-0.1094762000	0.0253214800
0.0027141415	-0.0835614900	-0.0111093550	-0.0836048150	-0.0247686900	-0.0823851550	-0.0361823350	-0.0809959500	-0.0449484800	-0.0791974250	-0.0530052500	-0.0772750700	-0.0610457800	-0.0754572950	-0.0689805100	-0.0745363900	-0.0764910750	-0.0733682350	-0.0832611500	-0.0722714700	-0.0899553800	-0.0712268100	-0.0958443600	-0.0685152350	-0.1009555000	-0.0640831050	-0.1069534500	-0.0601729750	-0.1125913500	-0.0550777700	-0.1174045000	-0.0498760750	-0.1227039000	-0.0435237150	-0.1276303000	-0.0368210350	-0.1312774500	-0.0288534100	-0.1329671500	-0.0201735550	-0.1339169500	-0.0113333200	-0.1327670000	-0.0017475810	-0.1304492500	0.0081050315	-0.1284284000	0.0179312200	-0.1261005500	0.0273804900
0.0026999845	-0.0831257000	-0.0091224210	-0.0822096450	-0.0212599600	-0.0816866550	-0.0313120600	-0.0811603400	-0.0393861200	-0.0809320250	-0.0467529750	-0.0808803950	-0.0539028650	-0.0812768500	-0.0606739950	-0.0798788700	-0.0673738650	-0.0778311800	-0.0739290250	-0.0763653850	-0.0806910800	-0.0740175600	-0.0874093450	-0.0708812600	-0.0936602450	-0.0664973800	-0.0993900200	-0.0613567100	-0.1047944500	-0.0552561750	-0.1092941500	-0.0491625850	-0.1155550500	-0.0430130700	-0.1211422000	-0.0357873100	-0.1266635500	-0.0279121500	-0.1306348000	-0.0195647450	-0.1333224000	-0.0110451525	-0.1348655000	-0.0019874489	-0.1340848500	0.0071353575	-0.1337200500	0.0160723450	-0.1326380000	0.0247517100
0.0015973760	-0.0491791650	-0.0099301610	-0.0532190600	-0.0221286750	-0.0586618150	-0.0316709700	-0.0641833300	-0.0381653600	-0.0698949900	-0.0437838300	-0.0753883350	-0.0506906400	-0.0782487800	-0.0583383550	-0.0787803000	-0.0659592600	-0.0786827600	-0.0730947850	-0.0795841500	-0.0804335400	-0.0781202350	-0.0875595950	-0.0764853750	-0.0934991000	-0.0746241250	-0.0978507750	-0.0718980750	-0.1023093500	-0.0676961050	-0.1072563000	-0.0634229400	-0.1124206000	-0.0572257450	-0.1182503000	-0.0500112550	-0.1239091500	-0.0420211600	-0.1294048000	-0.0340370900	-0.1327749000	-0.0256681050	-0.1335550000	-0.0161148900	-0.1316819000	-0.0063325585	-0.1293010500	0.0038082785	-0.1276580500	0.0143189200
0.0042003805	-0.1293192000	-0.0038091095	-0.1290425500	-0.0115643550	-0.1267769000	-0.0177526350	-0.1239637000	-0.0218316600	-0.1206695000	-0.0255968750	-0.1171734000	-0.0303148300	-0.1133662000	-0.0336387650	-0.1086189500	-0.0371420450	-0.1027504500	-0.0409368100	-0.0971363200	-0.0448194150	-0.0907322650	-0.0490780400	-0.0842641400	-0.0526254650	-0.0766196050	-0.0559595800	-0.0681683750	-0.0610751700	-0.0601518950	-0.0651794050	-0.0521824450	-0.0702442750	-0.0430490450	-0.0744333650	-0.0327829600	-0.0779956200	-0.0216296800	-0.0821666800	-0.0107538875	-0.0853132100	-0.0002073705	-0.0878180050	0.0107078850	-0.0891637150	0.0208963850	-0.0897336650	0.0309366200	-0.0890258600	0.0401073900
0.0041288690	-0.1271176000	-0.0062740985	-0.1271164500	-0.0166060150	-0.1251235000	-0.0253268500	-0.1238907000	-0.0319495250	-0.1219776000	-0.0379862200	-0.1191670500	-0.0435977650	-0.1150024500	-0.0490324900	-0.1103051500	-0.0539481850	-0.1048925500	-0.0586585950	-0.1000014050	-0.0621761250	-0.0935029100	-0.0646639400	-0.0863653700	-0.0659999050	-0.0780109900	-0.0682463650	-0.0692408850	-0.0700056650	-0.0594519400	-0.0719682250	-0.0502581950	-0.0757886300	-0.0400086250	-0.0801669850	-0.0291424700	-0.0843885250	-0.0175079150	-0.0881731750	-0.0064200035	-0.0926454550	0.0040538680	-0.0968964750	0.0148532500	-0.1007721000	0.0254157150	-0.1031736000	0.0354263900	-0.1041598000	0.0448733650
0.0034388035	-0.1058723500	-0.0086746425	-0.1047086500	-0.0207238500	-0.1042734000	-0.0301177600	-0.1047761000	-0.0365091900	-0.1073768500	-0.0425349050	-0.1091455000	-0.0478486150	-0.1090543000	-0.0528739500	-0.1075147000	-0.0569845600	-0.1034325000	-0.0603517750	-0.0986755850	-0.0641348150	-0.0931346100	-0.0686045550	-0.0872669150	-0.0712353950	-0.0792573450	-0.0732702700	-0.0701511200	-0.0749955350	-0.0603022350	-0.0775949550	-0.0513818700	-0.0827277000	-0.0418049600	-0.0885361050	-0.0316291800	-0.0949824100	-0.0209938950	-0.1018320600	-0.0111228150	-0.1084510500	-0.0020671160	-0.1134638500	0.0070467280	-0.1154590500	0.0164026600	-0.1166517500	0.0255427550	-0.1165307000	0.0346719350
0.0033670450	-0.1036630500	-0.0079716480	-0.1052908000	-0.0185005750	-0.1086450000	-0.0276748150	-0.1103394500	-0.0347086300	-0.1116850500	-0.0406826250	-0.1113030000	-0.0459641450	-0.1091148500	-0.0506121350	-0.1048069500	-0.0557488800	-0.1006521500	-0.0604982700	-0.0974202950	-0.0643145150	-0.0922975550	-0.0664112350	-0.0855623950	-0.0690678450	-0.0775465950	-0.0699824600	-0.0684411700	-0.0720153100	-0.0589105900	-0.0733207650	-0.0502715800	-0.0771308000	-0.0414604900	-0.0828680000	-0.0334441600	-0.0873883950	-0.0242157300	-0.0909085300	-0.0154444600	-0.0945865450	-0.0078039410	-0.0969467850	0.0017122650	-0.0986568150	0.0119367800	-0.0990290900	0.0214781650	-0.0993010100	0.0307525350
0.0038295140	-0.1179014000	-0.0095479725	-0.1186069000	-0.0223250250	-0.1187858000	-0.0319238050	-0.1200670000	-0.0385132200	-0.1183984500	-0.0438858700	-0.1149805000	-0.0486692900	-0.1112632500	-0.0506196150	-0.1061289000	-0.0511814450	-0.0993986000	-0.0519244000	-0.0935274300	-0.0540557800	-0.0872606600	-0.0593802300	-0.0825879400	-0.0648916300	-0.0765502800	-0.0703400700	-0.0696746350	-0.0752233100	-0.0613672250	-0.0769829300	-0.0523234500	-0.0792784650	-0.0420578250	-0.0825035300	-0.0320717150	-0.0877466450	-0.0224822050	-0.0952252500	-0.0146260700	-0.1006726450	-0.0054806785	-0.1048218500	0.0047528720	-0.1085154000	0.0146810350	-0.1091999500	0.0250781200	-0.1096303500	0.0351840450
0.0031722910	-0.0976671300	-0.0092403520	-0.0990762250	-0.0215690400	-0.0989269300	-0.0315075800	-0.0990617200	-0.0390556800	-0.0978350600	-0.0456689900	-0.0949956600	-0.0524756400	-0.0920805750	-0.0587002450	-0.0886913900	-0.0641124350	-0.0843669150	-0.0692435650	-0.0806039000	-0.0728193900	-0.0758478000	-0.0752086000	-0.0712111900	-0.0774341600	-0.0653687900	-0.0812483950	-0.0594342500	-0.0870950600	-0.0534468550	-0.0939373500	-0.0489429000	-0.1021032500	-0.0437866600	-0.1088904500	-0.0369297100	-0.1151092000	-0.0284829200	-0.1197851000	-0.0193465700	-0.1227875500	-0.0098905215	-0.1269601500	-0.0011373140	-0.1286469500	0.0082446765	-0.1297305000	0.0173955900	-0.1296204500	0.0262529400
0.0019093360	-0.0587838400	-0.0123790500	-0.0594937800	-0.0262214000	-0.0621154100	-0.0373337150	-0.0656591900	-0.0454713900	-0.0698538650	-0.0531492350	-0.0728281100	-0.0605584750	-0.0752715900	-0.0677230900	-0.0764904100	-0.0746634700	-0.0759086450	-0.0806835000	-0.0739217050	-0.0870903200	-0.0718583300	-0.0937802300	-0.0704368600	-0.1003129000	-0.0691223650	-0.1061755500	-0.0668911100	-0.1117645500	-0.0638445200	-0.1155839000	-0.0601995100	-0.1183425500	-0.0543627000	-0.1211087500	-0.0473862000	-0.1235887000	-0.0392745350	-0.1257766500	-0.0307760150	-0.1272502000	-0.0218673000	-0.1278023000	-0.0120066800	-0.1276677500	-0.0018642980	-0.1270834000	0.0080931855	-0.1259569500	0.0176035950
0.0045846355	-0.1152053500	-0.0039127040	-0.1139861500	-0.0130424750	-0.1123179000	-0.0209876900	-0.1092267500	-0.0280508200	-0.1055016500	-0.0347643200	-0.1030054000	-0.0410667950	-0.0996441750	-0.0461679050	-0.0957501850	-0.0509129700	-0.0912362100	-0.0560343100	-0.0858917500	-0.0615149150	-0.0797925800	-0.0670332100	-0.0735361350	-0.0727202700	-0.0679269150	-0.0795531950	-0.0626112800	-0.0864185000	-0.0578432100	-0.0925261050	-0.0511453550	-0.0988527400	-0.0443899800	-0.1038340000	-0.0359916750	-0.1076548000	-0.0271182550	-0.1110153000	-0.0181578750	-0.1141994000	-0.0087994045	-0.1146867000	0.0010086160	-0.1150870000	0.0113473760	-0.1161482500	0.0213639500	-0.1148333500	0.0313599100
0.0043367020	-0.1089751000	-0.0068190325	-0.1100180000	-0.0181228500	-0.1096711500	-0.0278984800	-0.1086111000	-0.0361929850	-0.1054180500	-0.0430671200	-0.1014599500	-0.0484458750	-0.0968587450	-0.0510937500	-0.0910977250	-0.0536087500	-0.0855399450	-0.0570777600	-0.0790448600	-0.0622358650	-0.0725716400	-0.0663131750	-0.0656057150	-0.0706174700	-0.0600876050	-0.0774940400	-0.0553671900	-0.0844445400	-0.0502565400	-0.0922236650	-0.0457354800	-0.1004927900	-0.0411690750	-0.1076233500	-0.0352236000	-0.1141733000	-0.0294605800	-0.1193737500	-0.0225890400	-0.1235915000	-0.0148917900	-0.1253104500	-0.0063894645	-0.1254560500	0.0030995260	-0.1255390000	0.0126449850	-0.1228552500	0.0219452300
0.0044130445	-0.1108937500	-0.0024020313	-0.1116186000	-0.0101240465	-0.1089800500	-0.0175061150	-0.1048131000	-0.0244134600	-0.0996074250	-0.0316025200	-0.0952019000	-0.0386088100	-0.0909487900	-0.0449129250	-0.0873282400	-0.0508408300	-0.0836075950	-0.0575165100	-0.0790786350	-0.0645761250	-0.0741615400	-0.0721785950	-0.0693921050	-0.0797875050	-0.0649938850	-0.0882425750	-0.0604724750	-0.0968472500	-0.0556458900	-0.1045915000	-0.0493401200	-0.1124524000	-0.0431771150	-0.1192929000	-0.0369977300	-0.1219426500	-0.0291214250	-0.1239290500	-0.0206188000	-0.1250544000	-0.0115894300	-0.1259826500	-0.0024209495	-0.1240827500	0.0071117945	-0.1219383500	0.0168092700	-0.1189226500	0.0263711750
0.0041908910	-0.1053111500	-0.0032529335	-0.1054717500	-0.0112279200	-0.1054141500	-0.0192380700	-0.1028346500	-0.0266837650	-0.1012605500	-0.0333090250	-0.0991404150	-0.0392921500	-0.0959073700	-0.0440245950	-0.0922215900	-0.0490280700	-0.0882669800	-0.0548671750	-0.0838825250	-0.0609727200	-0.0786830600	-0.0674392800	-0.0731317450	-0.0741500050	-0.0678670350	-0.0815541000	-0.0616809200	-0.0889274200	-0.0547241300	-0.0962553100	-0.0471692700	-0.1038286000	-0.0394813650	-0.1100203000	-0.0305157850	-0.1162242000	-0.0227116700	-0.1204514000	-0.0144754950	-0.1241880500	-0.0061635175	-0.1268159000	0.0019581620	-0.1277752000	0.0107604765	-0.1267770500	0.0194236400	-0.1253163500	0.0281948150
0.0022528825	-0.0566118550	-0.0101996375	-0.0591915550	-0.0232489250	-0.0623225850	-0.0349963100	-0.0648625750	-0.0450665600	-0.0678646250	-0.0534971450	-0.0702797500	-0.0611821600	-0.0714802900	-0.0674142350	-0.0729905100	-0.0732177800	-0.0736708250	-0.0793634100	-0.0734476550	-0.0855566450	-0.0732287650	-0.0915677350	-0.0719971100	-0.0975274900	-0.0704312450	-0.1035906500	-0.0676817850	-0.1092112000	-0.0633555900	-0.1146984000	-0.0582426600	-0.1200173500	-0.0524550050	-0.1235519500	-0.0452368450	-0.1265026000	-0.0379218250	-0.1289198500	-0.0301955950	-0.1314029000	-0.0222078500	-0.1329495500	-0.0139984250	-0.1327339000	-0.0051125960	-0.1314114500	0.0038668880	-0.1287884500	0.0129808350
0.0025342055	-0.0636811950	-0.0105896350	-0.0652948850	-0.0240129700	-0.0671638800	-0.0358764250	-0.0690361750	-0.0461289800	-0.0693096250	-0.0549091750	-0.0701483850	-0.0627503950	-0.0712207350	-0.0691887300	-0.0721476400	-0.0750233650	-0.0726599100	-0.0808713750	-0.0715074500	-0.0863639500	-0.0692035650	-0.0911846150	-0.0655165550	-0.0961920750	-0.0622530800	-0.1019904500	-0.0591805500	-0.1081195500	-0.0558961850	-0.1144579500	-0.0521581150	-0.1206196500	-0.0480881950	-0.1253826500	-0.0423804300	-0.1299520000	-0.0367108250	-0.1322649500	-0.0300337600	-0.1333960500	-0.0224914450	-0.1336938000	-0.0144118400	-0.1327713500	-0.0054947050	-0.1312925500	0.0036107465	-0.1289692000	0.0129779250
0.0025999530	-0.0653333150	-0.0106652200	-0.0653041900	-0.0239368050	-0.0676180800	-0.0352876150	-0.0715869000	-0.0450726550	-0.0752032750	-0.0528365550	-0.0781399300	-0.0598850350	-0.0794599750	-0.0656479800	-0.0799951900	-0.0707869050	-0.0790976600	-0.0765080700	-0.0776879450	-0.0825157850	-0.0760208650	-0.0884993050	-0.0738736700	-0.0942701750	-0.0707360250	-0.0997997300	-0.0660083600	-0.1059742500	-0.0610104550	-0.1118074500	-0.0550489100	-0.1181729000	-0.0492563800	-0.1233292500	-0.0421179150	-0.1277360500	-0.0349001900	-0.1311949000	-0.0272835650	-0.1331582500	-0.0189798950	-0.1334836000	-0.0102703660	-0.1333993000	-0.0009488565	-0.1318519500	0.0081522335	-0.1279516500	0.0170372950
0.0048657335	-0.1222694000	-0.0049537960	-0.1224439500	-0.0151321900	-0.1214038000	-0.0237699250	-0.1193405500	-0.0312009750	-0.1179488000	-0.0367543550	-0.1142907500	-0.0423419850	-0.1105139500	-0.0471828750	-0.1066820500	-0.0512009150	-0.1023835500	-0.0544696650	-0.0970538550	-0.0582821500	-0.0916995850	-0.0607608750	-0.0860171050	-0.0624815850	-0.0797048550	-0.0649998550	-0.0721407600	-0.0683960350	-0.0638379050	-0.0696614400	-0.0538077400	-0.0715017950	-0.0431424050	-0.0755732600	-0.0320647150	-0.0786869000	-0.0207434900	-0.0826070650	-0.0097975585	-0.0848997950	0.0014679813	-0.0887674950	0.0116759900	-0.0919623300	0.0214356450	-0.0936793700	0.0313942700	-0.0964995900	0.0400290050
0.0042106900	-0.1058092000	-0.0065402070	-0.1061401500	-0.0175609650	-0.1053375500	-0.0272477400	-0.1052742500	-0.0357498100	-0.1037380500	-0.0431651800	-0.1019328500	-0.0496573150	-0.1003174700	-0.0542118500	-0.0967098050	-0.0589086650	-0.0930254000	-0.0635832000	-0.0882720000	-0.0676232800	-0.0819194900	-0.0727189450	-0.0755269000	-0.0775142150	-0.0688911100	-0.0819953250	-0.0607824500	-0.0878788450	-0.0528615700	-0.0937090700	-0.0445058000	-0.1001286350	-0.0364156800	-0.1072091500	-0.0287650100	-0.1136820000	-0.0215251500	-0.1181832500	-0.0136045600	-0.1222013500	-0.0053134705	-0.1248091500	0.0028278680	-0.1251620000	0.0116645900	-0.1233633000	0.0204864050	-0.1206285000	0.0294604650
0.0031710815	-0.0796853550	-0.0082822310	-0.0810168300	-0.0203562400	-0.0812238300	-0.0313839150	-0.0807338250	-0.0412796550	-0.0801634300	-0.0498145550	-0.0795077450	-0.0575272950	-0.0789459550	-0.0639881700	-0.0787246300	-0.0700485200	-0.0774979850	-0.0763805300	-0.0755197200	-0.0824065850	-0.0722502950	-0.0885107200	-0.0686062600	-0.0949288050	-0.0653333600	-0.1020356000	-0.0622260650	-0.1088404500	-0.0585662700	-0.1149829000	-0.0542751000	-0.1191180000	-0.0480765000	-0.1232181500	-0.0412527750	-0.1264385500	-0.0340053600	-0.1282578000	-0.0262379150	-0.1289070500	-0.0179021250	-0.1293436000	-0.0092335900	-0.1285666000	-0.0000099240	-0.1273911500	0.0091323695	-0.1251504500	0.0184556700
0.0031859200	-0.0800581400	-0.0096165095	-0.0814807550	-0.0228178900	-0.0820130650	-0.0343236550	-0.0836940300	-0.0443894800	-0.0849295350	-0.0528197750	-0.0860580000	-0.0603446350	-0.0852392950	-0.0665150250	-0.0829304150	-0.0725161150	-0.0802939150	-0.0792455900	-0.0778980050	-0.0857790500	-0.0743883300	-0.0916192450	-0.0697157200	-0.0979082450	-0.0659419000	-0.1031662500	-0.0601139350	-0.1083119500	-0.0536467900	-0.1132621500	-0.0465033400	-0.1195395000	-0.0399663250	-0.1246487000	-0.0325017800	-0.1292149500	-0.0254548150	-0.1308930000	-0.0173896900	-0.1333304000	-0.0093551005	-0.1337783000	-0.0010708490	-0.1332481500	0.0077732325	-0.1315659000	0.0166090150	-0.1286000500	0.0255888250
0.0023520590	-0.0591044200	-0.0072927200	-0.0594874400	-0.0166822000	-0.0578235200	-0.0255938700	-0.0574738600	-0.0338044950	-0.0594973050	-0.0412172600	-0.0602615050	-0.0475586450	-0.0623095550	-0.0532004550	-0.0646943650	-0.0581716600	-0.0669865350	-0.0630131400	-0.0676343700	-0.0675723400	-0.0663496550	-0.0719386100	-0.0647350000	-0.0775112350	-0.0625718650	-0.0847496350	-0.0604092400	-0.0928596200	-0.0580798100	-0.1011499200	-0.0550930800	-0.1096033500	-0.0511127850	-0.1178022000	-0.0481548050	-0.1241183000	-0.0435637450	-0.1297370500	-0.0382397950	-0.1337977000	-0.0312416400	-0.1360624500	-0.0231028950	-0.1372262500	-0.0139014400	-0.1375511000	-0.0044796480	-0.1363452500	0.0053703960
0.0028883455	-0.0725808300	-0.0083925170	-0.0719920250	-0.0200188900	-0.0721678000	-0.0298852150	-0.0742391800	-0.0384698850	-0.0745532400	-0.0450608750	-0.0739881550	-0.0496430800	-0.0698843550	-0.0541939350	-0.0670602400	-0.0596085700	-0.0665737950	-0.0659157250	-0.0667952700	-0.0731411350	-0.0664764500	-0.0807379350	-0.0662067900	-0.0886880300	-0.0658455850	-0.0972208550	-0.0649420650	-0.1053075500	-0.0632746800	-0.1117801000	-0.0580339550	-0.1189767000	-0.0532544750	-0.1253555500	-0.0477166900	-0.1295635000	-0.0406325850	-0.1328343000	-0.0332255950	-0.1355355000	-0.0253264450	-0.1365524000	-0.0169307200	-0.1354076500	-0.0077598735	-0.1333933500	0.0018122245	-0.1306495500	0.0117943970
0.0019627420	-0.0493215650	-0.0094250680	-0.0492498050	-0.0206430400	-0.0510087550	-0.0292656750	-0.0572249150	-0.0374503100	-0.0629425900	-0.0450992900	-0.0666172100	-0.0526045800	-0.0685969050	-0.0591832350	-0.0696728750	-0.0654237150	-0.0710060000	-0.0720664950	-0.0724337400	-0.0788059100	-0.0730396350	-0.0855654100	-0.0723910300	-0.0922187700	-0.0708601250	-0.0993055500	-0.0684783950	-0.1063614500	-0.0651955100	-0.1134107000	-0.0615981350	-0.1196615000	-0.0567434800	-0.1242073500	-0.0499107200	-0.1280143500	-0.0427348800	-0.1307520500	-0.0350818150	-0.1329724000	-0.0268245750	-0.1350976500	-0.0183893200	-0.1353709000	-0.0092424345	-0.1344230000	0.0001153705	-0.1318077000	0.0095787240
0.0019446480	-0.0488667750	-0.0078601750	-0.0530757000	-0.0187783800	-0.0594333000	-0.0290296900	-0.0651092450	-0.0380870200	-0.0699542350	-0.0459088950	-0.0727663100	-0.0532200700	-0.0743894500	-0.0589664000	-0.0763675550	-0.0640731050	-0.0789187250	-0.0692473100	-0.0811190300	-0.0747847100	-0.0811577150	-0.0802024200	-0.0789538900	-0.0857225250	-0.0755481000	-0.0922731800	-0.0719302500	-0.0986978000	-0.0668646300	-0.1053577000	-0.0608957850	-0.1127771500	-0.0551133100	-0.1194143500	-0.0483885000	-0.1245658000	-0.0413696450	-0.1267703500	-0.0331360900	-0.1284261500	-0.0240484400	-0.1299003000	-0.0146141000	-0.1302049000	-0.0043679625	-0.1304515000	0.0058211485	-0.1298505000	0.0159757950
0.0022775475	-0.0572322400	-0.0079277360	-0.0607164100	-0.0191468350	-0.0671350300	-0.0298531100	-0.0728831150	-0.0394030150	-0.0775467900	-0.0480275800	-0.0804980550	-0.0555144750	-0.0837422700	-0.0616059000	-0.0857240150	-0.0673131450	-0.0861363750	-0.0729024400	-0.0842450700	-0.0782970000	-0.0807047250	-0.0836042400	-0.0761597950	-0.0898562350	-0.0734295250	-0.0971279850	-0.0721750800	-0.1040133500	-0.0691365400	-0.1097100000	-0.0639403100	-0.1140184500	-0.0570710450	-0.1175457000	-0.0488532200	-0.1195412000	-0.0405146650	-0.1187463000	-0.0320545300	-0.1185856000	-0.0229374200	-0.1204859500	-0.0136095750	-0.1213049500	-0.0034557995	-0.1209787500	0.0067905825	-0.1205137500	0.0171842800
0.0046530325	-0.1169255000	-0.0045269000	-0.1159226500	-0.0142386650	-0.1143718500	-0.0225724250	-0.1111217500	-0.0298297250	-0.1071089000	-0.0363855050	-0.1021774000	-0.0427621850	-0.0970282450	-0.0482935900	-0.0921303850	-0.0536816100	-0.0869366250	-0.0597356100	-0.0814605550	-0.0655687950	-0.0751774800	-0.0723607650	-0.0704152100	-0.0795057150	-0.0660142350	-0.0856814700	-0.0595922800	-0.0923895500	-0.0530065700	-0.0984065950	-0.0457524250	-0.1049512500	-0.0388002450	-0.1097443000	-0.0303397400	-0.1135142000	-0.0221712000	-0.1174633500	-0.0151861500	-0.1218428500	-0.0083034815	-0.1232015500	-0.0006063850	-0.1218603000	0.0081070595	-0.1202909000	0.0172714800	-0.1181278000	0.0266828100
0.0037539620	-0.0943332250	-0.0070952050	-0.0942289300	-0.0180789250	-0.0933611100	-0.0276067350	-0.0912502650	-0.0358273900	-0.0900586750	-0.0426542000	-0.0880825850	-0.0489615150	-0.0859930400	-0.0544578650	-0.0835716950	-0.0599441200	-0.0807280500	-0.0664095050	-0.0788266550	-0.0729079000	-0.0762907150	-0.0795967100	-0.0729611700	-0.0863996000	-0.0696765400	-0.0933155100	-0.0655375850	-0.0990537950	-0.0594088350	-0.1051287050	-0.0531702200	-0.1109034500	-0.0463823800	-0.1157207000	-0.0386118800	-0.1184178000	-0.0300762900	-0.1200564000	-0.0211719450	-0.1225637500	-0.0122109625	-0.1237196000	-0.0031655360	-0.1233291500	0.0064890016	-0.1225033000	0.0161433175	-0.1211545000	0.0257216950
0.0035185585	-0.0884175500	-0.0085127710	-0.0889731100	-0.0207057800	-0.0878429850	-0.0316451600	-0.0865717000	-0.0412659150	-0.0849354900	-0.0495673300	-0.0832508450	-0.0570719450	-0.0812062550	-0.0633719800	-0.0786354600	-0.0695890650	-0.0762226450	-0.0764110400	-0.0737550450	-0.0835247650	-0.0712252150	-0.0902195100	-0.0676379650	-0.0968457350	-0.0639537050	-0.1039740500	-0.0600227550	-0.1108344000	-0.0557858700	-0.1164830500	-0.0498707150	-0.1214429000	-0.0429528600	-0.1268482500	-0.0365402250	-0.1293246000	-0.0292953900	-0.1301432000	-0.0214896400	-0.1324963500	-0.0137950550	-0.1323942000	-0.0058132650	-0.1304003000	0.0027742885	-0.1280385000	0.0115124050	-0.1255818500	0.0205032250
0.0042171645	-0.1059728500	-0.0080937035	-0.1057532500	-0.0207645000	-0.1045635000	-0.0319904550	-0.1040587000	-0.0413442000	-0.1031567500	-0.0494710800	-0.1019609000	-0.0563750700	-0.0998817400	-0.0618422250	-0.0983843300	-0.0656384950	-0.0946885000	-0.0705328450	-0.0912491150	-0.0749001900	-0.0863061800	-0.0775332300	-0.0801961300	-0.0797219900	-0.0734211000	-0.0828903700	-0.0657150900	-0.0861075150	-0.0570738600	-0.0899045000	-0.0478191900	-0.0929765700	-0.0380963400	-0.0965937350	-0.0286799150	-0.1015169500	-0.0202083450	-0.1062689500	-0.0124700850	-0.1115236500	-0.0052785260	-0.1153155000	0.0024961505	-0.1157553000	0.0114712800	-0.1160913500	0.0205375350	-0.1161172500	0.0295366550
0.0034117270	-0.0857332450	-0.0080720490	-0.0867934650	-0.0197208200	-0.0894209450	-0.0297451950	-0.0919677400	-0.0382841100	-0.0922747400	-0.0452176550	-0.0900989350	-0.0511850400	-0.0865441400	-0.0563521550	-0.0827403150	-0.0619541050	-0.0797382450	-0.0687054050	-0.0774440150	-0.0760466250	-0.0749323000	-0.0829360350	-0.0709198900	-0.0898769950	-0.0663719650	-0.0973700200	-0.0611780250	-0.1052188500	-0.0563839650	-0.1125546000	-0.0507822950	-0.1189295000	-0.0438629500	-0.1237803500	-0.0354623400	-0.1277118000	-0.0269145150	-0.1306939000	-0.0181390850	-0.1328315500	-0.0089527165	-0.1346755000	0.0001698731	-0.1340925500	0.0096075610	-0.1315879500	0.0188495250	-0.1277998500	0.0279607500
0.0037467255	-0.0941514450	-0.0068991870	-0.0932210400	-0.0180133450	-0.0923872750	-0.0279711050	-0.0919016350	-0.0367401300	-0.0911445750	-0.0437378400	-0.0886694950	-0.0494750900	-0.0849948250	-0.0543409100	-0.0814312350	-0.0598088200	-0.0784796850	-0.0659158250	-0.0753091500	-0.0723747550	-0.0718900650	-0.0792661100	-0.0689703850	-0.0863770700	-0.0662012150	-0.0934843350	-0.0616903800	-0.1010543500	-0.0573851800	-0.1078916000	-0.0519276100	-0.1133827000	-0.0447490150	-0.1178460000	-0.0364667200	-0.1211639500	-0.0276606050	-0.1249129500	-0.0190278900	-0.1285957000	-0.0102729750	-0.1315412000	-0.0016031330	-0.1323795500	0.0074989740	-0.1314201500	0.0164420300	-0.1290465500	0.0253017100
0.0031945740	-0.0802765300	-0.0078286840	-0.0827878550	-0.0192673050	-0.0867390100	-0.0295376700	-0.0889097550	-0.0378794800	-0.0909075600	-0.0443842950	-0.0898598950	-0.0493718050	-0.0859717850	-0.0546830150	-0.0832911800	-0.0604280450	-0.0810217650	-0.0669065500	-0.0781552250	-0.0732934400	-0.0739711150	-0.0796788250	-0.0691358700	-0.0864716750	-0.0648227100	-0.0933882950	-0.0599321250	-0.1012478500	-0.0560907250	-0.1074117500	-0.0501019700	-0.1114665000	-0.0421468150	-0.1166884500	-0.0347315050	-0.1209365500	-0.0270530850	-0.1248849000	-0.0194594700	-0.1284833000	-0.0112798000	-0.1308877500	-0.0026847425	-0.1317612000	0.0066250540	-0.1324018500	0.0157706300	-0.1310894500	0.0247501000
0.0036160455	-0.0908678100	-0.0060241330	-0.0915413650	-0.0152372450	-0.0921652900	-0.0235470550	-0.0915174600	-0.0315280750	-0.0891098450	-0.0390721350	-0.0871144600	-0.0464128800	-0.0867427500	-0.0524373250	-0.0847233750	-0.0583318050	-0.0822797050	-0.0643087050	-0.0788405200	-0.0701564700	-0.0749524700	-0.0760481400	-0.0699338500	-0.0824434750	-0.0649321950	-0.0904181450	-0.0606536950	-0.0985544450	-0.0559360550	-0.1066315500	-0.0510762750	-0.1138900500	-0.0447682600	-0.1198658000	-0.0372147200	-0.1247167500	-0.0296952750	-0.1278729500	-0.0216599500	-0.1313819500	-0.0135147300	-0.1334555500	-0.0050861890	-0.1331350500	0.0040342805	-0.1320136000	0.0131217550	-0.1289425500	0.0220083700
0.0020814285	-0.0523043700	-0.0087979780	-0.0546530100	-0.0201996200	-0.0595089600	-0.0302608750	-0.0643212850	-0.0394041100	-0.0682403150	-0.0471660900	-0.0703706700	-0.0543595950	-0.0714520250	-0.0602788750	-0.0732828750	-0.0662174400	-0.0741744500	-0.0727060000	-0.0749608150	-0.0792742200	-0.0754426650	-0.0857515300	-0.0747963100	-0.0923280200	-0.0733970100	-0.0991995400	-0.0713517650	-0.1059712500	-0.0680839600	-0.1123497500	-0.0635781750	-0.1174391500	-0.0570543950	-0.1216594000	-0.0491902600	-0.1253014000	-0.0410342250	-0.1279796500	-0.0324154950	-0.1310630000	-0.0236375850	-0.1323870500	-0.0143924400	-0.1320143000	-0.0043761480	-0.1324842000	0.0055289690	-0.1299219500	0.0151855900
0.0043872690	-0.1102480500	-0.0043414160	-0.1090789000	-0.0130900550	-0.1063646000	-0.0203409000	-0.1025825500	-0.0257797550	-0.0975119500	-0.0303415950	-0.0922281000	-0.0349296350	-0.0867204050	-0.0384088750	-0.0819403750	-0.0426484900	-0.0769162550	-0.0481568350	-0.0715445100	-0.0533264400	-0.0649009900	-0.0605038600	-0.0600672600	-0.0679597650	-0.0550780250	-0.0768899150	-0.0508959550	-0.0856006200	-0.0471147450	-0.0949203000	-0.0431190650	-0.1043120500	-0.0379932900	-0.1129450500	-0.0315153600	-0.1204717500	-0.0247901900	-0.1259840000	-0.0169864250	-0.1310393500	-0.0087342600	-0.1342960500	-0.0000961315	-0.1357158000	0.0090885350	-0.1358715500	0.0181627000	-0.1360385500	0.0269881350
0.0034890320	-0.0876764550	-0.0061252545	-0.0877774500	-0.0163219050	-0.0890281750	-0.0256353050	-0.0886386800	-0.0339144250	-0.0878026000	-0.0413867100	-0.0870017050	-0.0481225200	-0.0855416050	-0.0535610000	-0.0828635550	-0.0586706750	-0.0797829250	-0.0643937200	-0.0763410300	-0.0709330400	-0.0732592250	-0.0782711600	-0.0714715400	-0.0858974650	-0.0702450050	-0.0935559400	-0.0671385300	-0.1010297850	-0.0631791350	-0.1073250500	-0.0573888900	-0.1126962000	-0.0498734550	-0.1182364000	-0.0419703350	-0.1230967500	-0.0340292350	-0.1264991000	-0.0256229100	-0.1289523500	-0.0165802350	-0.1297008000	-0.0071610145	-0.1301745500	0.0027153955	-0.1298277000	0.0122414550	-0.1274237500	0.0212907050
0.0030642095	-0.0770009500	-0.0105481600	-0.0767663850	-0.0246087950	-0.0770650850	-0.0369877650	-0.0773775800	-0.0477471500	-0.0781186800	-0.0567111300	-0.0782274750	-0.0647304600	-0.0775208150	-0.0714503000	-0.0775696550	-0.0775814700	-0.0769829250	-0.0839257050	-0.0766142650	-0.0900172150	-0.0758005900	-0.0956552700	-0.0740473350	-0.1002335500	-0.0701212550	-0.1058256500	-0.0662964800	-0.1107447500	-0.0612594500	-0.1148304000	-0.0548168900	-0.1191217500	-0.0479233900	-0.1224232500	-0.0400880000	-0.1239454500	-0.0317190150	-0.1254828000	-0.0231802450	-0.1265326500	-0.0143331700	-0.1272418000	-0.0054296165	-0.1266671000	0.0039418185	-0.1250911000	0.0131711700	-0.1237921500	0.0225588400
0.0027097390	-0.0680936000	-0.0078687005	-0.0697734600	-0.0184370100	-0.0734515350	-0.0284294800	-0.0732957200	-0.0375221350	-0.0724629200	-0.0451878850	-0.0706930800	-0.0520015950	-0.0690704150	-0.0579894550	-0.0696888550	-0.0636429750	-0.0702946400	-0.0700837600	-0.0701616250	-0.0769113350	-0.0694268450	-0.0839564400	-0.0693869500	-0.0910599150	-0.0699822600	-0.0983677550	-0.0698864950	-0.1051448500	-0.0682350550	-0.1106267000	-0.0637239800	-0.1152296000	-0.0574075200	-0.1188647000	-0.0496052000	-0.1216938000	-0.0412143400	-0.1255546000	-0.0331574100	-0.1288297500	-0.0246176050	-0.1310563500	-0.0156659350	-0.1326809500	-0.0060738705	-0.1331025500	0.0035743255	-0.1310401000	0.0132316050
0.0018587120	-0.0467079300	-0.0115596050	-0.0473613850	-0.0249026550	-0.0496483500	-0.0357949100	-0.0534208350	-0.0448856350	-0.0581926300	-0.0526140300	-0.0620906250	-0.0593439900	-0.0653418350	-0.0645815200	-0.0684032850	-0.0697954800	-0.0703157500	-0.0754067350	-0.0715072700	-0.0812472000	-0.0715690900	-0.0871951250	-0.0719965600	-0.0931084850	-0.0715807950	-0.0991562550	-0.0702930250	-0.1049168000	-0.0670246600	-0.1109509000	-0.0628197400	-0.1167396500	-0.0572318650	-0.1221880000	-0.0509380350	-0.1263980000	-0.0439921050	-0.1299144500	-0.0367309700	-0.1323319500	-0.0287713200	-0.1328863500	-0.0200697150	-0.1326906500	-0.0105394860	-0.1320452500	-0.0009299119	-0.1305566500	0.0089544345
0.0030290830	-0.0761185250	-0.0095284400	-0.0760959900	-0.0223750850	-0.0767476900	-0.0336265200	-0.0779181050	-0.0435194000	-0.0780080550	-0.0519169900	-0.0775630100	-0.0594876150	-0.0765223600	-0.0658358050	-0.0758262150	-0.0718021650	-0.0753788500	-0.0779333900	-0.0745876700	-0.0843168600	-0.0737439900	-0.0906017700	-0.0719450850	-0.0966308150	-0.0705584000	-0.1025474000	-0.0669049950	-0.1084725500	-0.0624211850	-0.1142525000	-0.0572415250	-0.1188395500	-0.0505346100	-0.1235264500	-0.0435811400	-0.1260316500	-0.0358515950	-0.1279308500	-0.0277802950	-0.1293009000	-0.0192634850	-0.1294381000	-0.0104416895	-0.1289332000	-0.0010643102	-0.1276799500	0.0083181045	-0.1251420500	0.0176046850
0.0021150180	-0.0531488400	-0.0115326050	-0.0544358000	-0.0251194400	-0.0590250300	-0.0369430000	-0.0644749550	-0.0469417250	-0.0697082850	-0.0553878000	-0.0734796900	-0.0626579100	-0.0768951400	-0.0684861100	-0.0795319000	-0.0737573850	-0.0813222200	-0.0793009600	-0.0820829350	-0.0847240300	-0.0805807400	-0.0897225250	-0.0780033650	-0.0948437800	-0.0751591050	-0.1009129500	-0.0725701950	-0.1066410500	-0.0686303000	-0.1120760500	-0.0633953500	-0.1167498500	-0.0568146050	-0.1204434000	-0.0490383500	-0.1227113000	-0.0407674700	-0.1243496000	-0.0320767150	-0.1264532500	-0.0231271650	-0.1270365500	-0.0138018050	-0.1255224500	-0.0038300105	-0.1239409000	0.0061851055	-0.1218911500	0.0163978850
0.0043605030	-0.1095762000	-0.0031861445	-0.1087587000	-0.0116415600	-0.1062637500	-0.0203737350	-0.1037257000	-0.0284632500	-0.1014960000	-0.0357756950	-0.0986639950	-0.0420761650	-0.0943644700	-0.0472199700	-0.0898240250	-0.0533540850	-0.0867524600	-0.0601005900	-0.0828900650	-0.0671612050	-0.0785124950	-0.0737396300	-0.0731593550	-0.0807777250	-0.0681781250	-0.0884664600	-0.0622900350	-0.0961816250	-0.0560467250	-0.1041822000	-0.0499551950	-0.1103876500	-0.0427012600	-0.1153519500	-0.0346827000	-0.1187331000	-0.0266039300	-0.1209452500	-0.0180779450	-0.1215319500	-0.0088285275	-0.1221184500	0.0004381971	-0.1219545000	0.0101870385	-0.1205712000	0.0196591350	-0.1176403500	0.0289356650
0.0040909840	-0.1028036000	-0.0060616540	-0.1016321500	-0.0161886100	-0.1001017250	-0.0249214200	-0.0994184400	-0.0327293200	-0.0990822200	-0.0393349400	-0.0971592600	-0.0454782600	-0.0943389250	-0.0501894250	-0.0899356700	-0.0547871850	-0.0849629150	-0.0592805700	-0.0784697600	-0.0648357650	-0.0716918100	-0.0703749500	-0.0646762600	-0.0767909650	-0.0590712500	-0.0848774750	-0.0547988100	-0.0934204200	-0.0504510600	-0.1023289600	-0.0470293250	-0.1105827500	-0.0425327650	-0.1172312500	-0.0358064250	-0.1216086500	-0.0278254850	-0.1245795000	-0.0190500450	-0.1273154000	-0.0098479095	-0.1296213000	-0.0008741165	-0.1292858500	0.0088219540	-0.1287835000	0.0184831350	-0.1267090500	0.0281734600
0.0031060470	-0.0780528250	-0.0075818575	-0.0800556100	-0.0189786150	-0.0809450200	-0.0295390100	-0.0800748950	-0.0390395400	-0.0780161900	-0.0474829800	-0.0771244100	-0.0552319000	-0.0767905250	-0.0617706050	-0.0768241950	-0.0678973800	-0.0755961550	-0.0742586150	-0.0730640100	-0.0811442600	-0.0704707450	-0.0882345050	-0.0679341250	-0.0953892900	-0.0655974200	-0.1028170500	-0.0625604900	-0.1103200000	-0.0597493200	-0.1170707000	-0.0564622650	-0.1221673500	-0.0513511950	-0.1257581500	-0.0449636300	-0.1273003000	-0.0376036150	-0.1285635500	-0.0298358100	-0.1282828500	-0.0216192500	-0.1261771000	-0.0132131150	-0.1242554500	-0.0036078545	-0.1229167500	0.0062615310	-0.1217414000	0.0163541200
0.0014243870	-0.0357938600	-0.0091115770	-0.0381601550	-0.0194980500	-0.0422441900	-0.0276879900	-0.0479623300	-0.0366906300	-0.0526394500	-0.0443163350	-0.0571974700	-0.0507806350	-0.0619659550	-0.0561859850	-0.0659654700	-0.0610741700	-0.0695891500	-0.0665010950	-0.0725578950	-0.0726431100	-0.0737011450	-0.0791281750	-0.0742382250	-0.0857383850	-0.0749440150	-0.0928516700	-0.0743224150	-0.0999787100	-0.0723420150	-0.1070617000	-0.0686832450	-0.1135883500	-0.0632286600	-0.1198680000	-0.0569310000	-0.1243445500	-0.0495074250	-0.1273556000	-0.0411643350	-0.1293665500	-0.0318705250	-0.1312641500	-0.0221356050	-0.1329567500	-0.0116900050	-0.1329561000	-0.0011635144	-0.1326751000	0.0095560745
0.0038031510	-0.0955705600	-0.0071222425	-0.0962836150	-0.0181763900	-0.0954676350	-0.0280779350	-0.0937149900	-0.0366468700	-0.0921504400	-0.0435953300	-0.0897405600	-0.0502347800	-0.0880185400	-0.0553559500	-0.0850765900	-0.0607224300	-0.0817577200	-0.0670920900	-0.0785711850	-0.0741270200	-0.0755531950	-0.0812907300	-0.0725872350	-0.0881161900	-0.0696596050	-0.0940494350	-0.0640211850	-0.1004096850	-0.0584525700	-0.1063816000	-0.0518417200	-0.1121258500	-0.0447343400	-0.1162523000	-0.0362361900	-0.1214412500	-0.0291795450	-0.1248828000	-0.0217815100	-0.1263750500	-0.0132691800	-0.1260394000	-0.0040725550	-0.1251772500	0.0058974480	-0.1234861000	0.0158408950	-0.1222145000	0.0259505200
0.0036312925	-0.0912521200	-0.0073172210	-0.0921114200	-0.0185692850	-0.0926938100	-0.0287167450	-0.0920874700	-0.0376719150	-0.0899564050	-0.0456272600	-0.0882459400	-0.0526861150	-0.0854797600	-0.0590781250	-0.0835235300	-0.0650762650	-0.0808138300	-0.0716375050	-0.0780388650	-0.0783397250	-0.0745987800	-0.0850208200	-0.0707443350	-0.0913764450	-0.0663072700	-0.0984903550	-0.0617681150	-0.1054846000	-0.0567411400	-0.1118852000	-0.0507837800	-0.1179332500	-0.0443358100	-0.1224789000	-0.0367644500	-0.1260744000	-0.0292109100	-0.1281641000	-0.0212997050	-0.1294257000	-0.0128976650	-0.1297118500	-0.0043059785	-0.1290602500	0.0045528620	-0.1264650000	0.0131070100	-0.1223126000	0.0214763850
0.0031932215	-0.0802437150	-0.0089379665	-0.0817458800	-0.0215492600	-0.0842113550	-0.0331516400	-0.0842296450	-0.0436660600	-0.0844257950	-0.0526728700	-0.0838329650	-0.0607789650	-0.0845754500	-0.0674547300	-0.0848887150	-0.0734616350	-0.0848243900	-0.0795427300	-0.0841116850	-0.0851257000	-0.0823805950	-0.0905067250	-0.0797185100	-0.0957915350	-0.0763571700	-0.1012648900	-0.0725101300	-0.1052998000	-0.0672259700	-0.1088987500	-0.0604897550	-0.1127657500	-0.0525960650	-0.1171054000	-0.0443291500	-0.1189135500	-0.0352803250	-0.1198212500	-0.0259266650	-0.1206596500	-0.0161121350	-0.1218822000	-0.0063998235	-0.1220695000	0.0037328930	-0.1198653000	0.0138270000	-0.1177102000	0.0241032150
0.0032665745	-0.0820871200	-0.0100414835	-0.0818553600	-0.0230397900	-0.0833505400	-0.0335717700	-0.0864364150	-0.0438605500	-0.0885124200	-0.0528480450	-0.0891580400	-0.0608925500	-0.0887881950	-0.0675344150	-0.0869421550	-0.0737056500	-0.0850417850	-0.0795937550	-0.0821946150	-0.0850741750	-0.0783627800	-0.0904168850	-0.0739985250	-0.0968927900	-0.0712425050	-0.1041976000	-0.0691896000	-0.1103200500	-0.0646249000	-0.1156014500	-0.0585453200	-0.1199240500	-0.0516074600	-0.1208750500	-0.0431406850	-0.1193088000	-0.0340588650	-0.1194765500	-0.0244270850	-0.1209360500	-0.0144438750	-0.1223851000	-0.0040930790	-0.1226118500	0.0069526335	-0.1209869000	0.0178777750	-0.1195084500	0.0288526800
0.0023842085	-0.0599137950	-0.0105156200	-0.0616834650	-0.0231751500	-0.0665599100	-0.0347044000	-0.0703607400	-0.0447793200	-0.0736593600	-0.0531645850	-0.0758645150	-0.0606228850	-0.0764835400	-0.0668791250	-0.0775456500	-0.0728755200	-0.0773781750	-0.0788274250	-0.0755742700	-0.0844669900	-0.0733004700	-0.0904645850	-0.0717881400	-0.0965030800	-0.0691662500	-0.1032718000	-0.0663703350	-0.1089056500	-0.0621138500	-0.1141297500	-0.0565940600	-0.1192399000	-0.0504739900	-0.1234904500	-0.0434368450	-0.1263660000	-0.0357911400	-0.1282348500	-0.0276549150	-0.1306867500	-0.0192637550	-0.1327190500	-0.0107190485	-0.1330311500	-0.0015449799	-0.1310969000	0.0073962830	-0.1281921000	0.0165853350
0.0041886020	-0.1052572500	-0.0067735590	-0.1059398000	-0.0180802450	-0.1057640500	-0.0280103900	-0.1059754000	-0.0364883650	-0.1059391500	-0.0433759700	-0.1035210000	-0.0495158200	-0.1001267600	-0.0546824950	-0.0971013400	-0.0591036600	-0.0926545150	-0.0643699300	-0.0879695100	-0.0703364100	-0.0831139400	-0.0757370500	-0.0774510450	-0.0807843550	-0.0717783850	-0.0865499600	-0.0664466450	-0.0935443950	-0.0615499750	-0.0992161350	-0.0550580250	-0.1032439000	-0.0469847650	-0.1072729000	-0.0386227550	-0.1098232500	-0.0300961750	-0.1122149000	-0.0212707000	-0.1138263500	-0.0119779500	-0.1139188500	-0.0024271570	-0.1121193500	0.0075021605	-0.1093715500	0.0171706200	-0.1068959000	0.0271246800
0.0043314025	-0.1088459000	-0.0071235170	-0.1094209500	-0.0187843750	-0.1106311000	-0.0289713600	-0.1102807000	-0.0374982300	-0.1114222500	-0.0443536000	-0.1105623000	-0.0502098850	-0.1091103500	-0.0544463300	-0.1059624500	-0.0580438150	-0.1018528000	-0.0619190500	-0.0976276400	-0.0645096900	-0.0913116200	-0.0667686850	-0.0843201400	-0.0686012450	-0.0771074600	-0.0709271250	-0.0687325250	-0.0739575050	-0.0596882550	-0.0786106650	-0.0503324950	-0.0828434450	-0.0399598300	-0.0882632800	-0.0298304700	-0.0946034450	-0.0210414300	-0.1003254000	-0.0124212550	-0.1061772000	-0.0039206355	-0.1095880500	0.0051641065	-0.1121059000	0.0146178650	-0.1137507500	0.0237164550	-0.1115516000	0.0326283400
0.0031258775	-0.0785516350	-0.0094647320	-0.0801414850	-0.0223854700	-0.0815456900	-0.0334735200	-0.0822190400	-0.0424744900	-0.0841048850	-0.0495815650	-0.0858115500	-0.0559551850	-0.0853667550	-0.0613048550	-0.0841296650	-0.0656328750	-0.0818056450	-0.0696390450	-0.0783009450	-0.0743859700	-0.0747771500	-0.0807025900	-0.0725944850	-0.0874061900	-0.0698992800	-0.0944818250	-0.0664658050	-0.1017701000	-0.0625972700	-0.1087968000	-0.0578985750	-0.1151147500	-0.0519938200	-0.1201763000	-0.0448414350	-0.1236515000	-0.0368827800	-0.1263474000	-0.0285649900	-0.1279612500	-0.0194870400	-0.1285391000	-0.0099256800	-0.1282072000	0.0002675059	-0.1267153500	0.0104593450	-0.1252039500	0.0207828550
0.0039375210	-0.0989479000	-0.0069756185	-0.0999070750	-0.0181472400	-0.0990617600	-0.0281254900	-0.0969224400	-0.0366019250	-0.0935954000	-0.0436919750	-0.0901228100	-0.0498397800	-0.0859743900	-0.0550177100	-0.0818694000	-0.0598089650	-0.0780763750	-0.0652168900	-0.0745236600	-0.0704407650	-0.0701512100	-0.0768363000	-0.0666652200	-0.0836193200	-0.0627742900	-0.0912418400	-0.0588159050	-0.0990634800	-0.0544711750	-0.1069616500	-0.0501900550	-0.1139383000	-0.0446771750	-0.1200641000	-0.0381037700	-0.1252789500	-0.0318611350	-0.1278281000	-0.0245916950	-0.1297189500	-0.0166151100	-0.1300189500	-0.0082225220	-0.1291041000	0.0009639000	-0.1270983000	0.0101820280	-0.1251310500	0.0197830250
0.0029846485	-0.0750027350	-0.0091814335	-0.0750244050	-0.0215402600	-0.0747392650	-0.0321554300	-0.0728435450	-0.0410214600	-0.0716810200	-0.0481979250	-0.0719482550	-0.0545133350	-0.0734654000	-0.0600626600	-0.0756706450	-0.0657501600	-0.0767825450	-0.0719338700	-0.0772496700	-0.0781841350	-0.0755674650	-0.0848127150	-0.0748453600	-0.0908831000	-0.0726561300	-0.0964971550	-0.0687499150	-0.1020633500	-0.0640968950	-0.1076201000	-0.0585059500	-0.1132346000	-0.0523715650	-0.1186292500	-0.0454876250	-0.1226466000	-0.0380413200	-0.1266317000	-0.0308838150	-0.1290442000	-0.0226494700	-0.1311179000	-0.0140918450	-0.1313068000	-0.0047804730	-0.1295685000	0.0046970090	-0.1276463500	0.0146052450
0.0028828760	-0.0724453800	-0.0088023345	-0.0748740600	-0.0213060550	-0.0771992000	-0.0324859950	-0.0790978850	-0.0425505550	-0.0798406900	-0.0512305200	-0.0798178050	-0.0591641450	-0.0799997300	-0.0658397550	-0.0792377550	-0.0719793450	-0.0778747850	-0.0785350600	-0.0772565100	-0.0849295250	-0.0759181350	-0.0908275500	-0.0739940950	-0.0958729050	-0.0705893100	-0.1019241000	-0.0667832750	-0.1084366000	-0.0629719300	-0.1140303500	-0.0577666900	-0.1185751000	-0.0510713800	-0.1224581500	-0.0434754900	-0.1252588500	-0.0358301250	-0.1269657000	-0.0277445050	-0.1283258000	-0.0192579450	-0.1287611500	-0.0104621100	-0.1282831000	-0.0010448348	-0.1259760500	0.0082000100	-0.1235559000	0.0178651750
0.0034849320	-0.0875749250	-0.0082564030	-0.0863927050	-0.0202949000	-0.0865321700	-0.0308855650	-0.0875592700	-0.0400153050	-0.0868205100	-0.0475033200	-0.0864850400	-0.0541332600	-0.0872181850	-0.0595526100	-0.0846252450	-0.0652290600	-0.0835610450	-0.0719241550	-0.0832510700	-0.0786994950	-0.0812939400	-0.0848858250	-0.0774677850	-0.0911583350	-0.0737691750	-0.0974978650	-0.0693566150	-0.1024005000	-0.0626874050	-0.1083616500	-0.0562439150	-0.1135514000	-0.0482859350	-0.1190034000	-0.0404116400	-0.1218674000	-0.0317550400	-0.1242926500	-0.0227657350	-0.1243949000	-0.0131931150	-0.1238467500	-0.0032543146	-0.1235354500	0.0070054990	-0.1235980500	0.0167211850	-0.1209186000	0.0256302350
0.0024843850	-0.0624316700	-0.0075833540	-0.0652135400	-0.0186145000	-0.0701086100	-0.0291760300	-0.0733222600	-0.0390921100	-0.0747313900	-0.0476042900	-0.0754631350	-0.0550604750	-0.0759247550	-0.0610508050	-0.0749164950	-0.0666809050	-0.0732337000	-0.0730187600	-0.0724270800	-0.0796502500	-0.0722592200	-0.0861022350	-0.0713931400	-0.0920808650	-0.0681304700	-0.0984201650	-0.0636147550	-0.1054094500	-0.0591119550	-0.1118678500	-0.0536084350	-0.1169155500	-0.0465052150	-0.1211672500	-0.0384303850	-0.1255878500	-0.0303418250	-0.1302446500	-0.0227108000	-0.1339199500	-0.0145275550	-0.1356607000	-0.0058259340	-0.1365586500	0.0033377840	-0.1367739000	0.0121242350	-0.1348644500	0.0207306350
0.0026219250	-0.0658880350	-0.0088706490	-0.0683075000	-0.0216963350	-0.0693970000	-0.0332674250	-0.0700420850	-0.0431612100	-0.0701595800	-0.0507782400	-0.0707262450	-0.0578462250	-0.0711638200	-0.0640985650	-0.0719478850	-0.0703259700	-0.0707361500	-0.0769585400	-0.0690378250	-0.0840550050	-0.0685158000	-0.0908408500	-0.0661243350	-0.0977736950	-0.0643428950	-0.1047319000	-0.0609388450	-0.1117059000	-0.0571936800	-0.1176487000	-0.0523753650	-0.1221697000	-0.0461240450	-0.1264238500	-0.0396877050	-0.1288208500	-0.0334067600	-0.1287288500	-0.0274862200	-0.1267799500	-0.0214212800	-0.1243044000	-0.0143922150	-0.1214870500	-0.0059644815	-0.1203291000	0.0025819520	-0.1181494500	0.0115791150
0.0035626880	-0.0895289200	-0.0066431380	-0.0906038100	-0.0166101000	-0.0928689100	-0.0248519700	-0.0927857150	-0.0311631400	-0.0904903050	-0.0365565400	-0.0864209050	-0.0430947900	-0.0841053800	-0.0495054550	-0.0820230150	-0.0559939950	-0.0798823850	-0.0627657200	-0.0775194050	-0.0696474750	-0.0756178100	-0.0750842900	-0.0728901500	-0.0792264800	-0.0686698950	-0.0833844800	-0.0629745600	-0.0877523600	-0.0579422550	-0.0932169000	-0.0519141350	-0.0993676300	-0.0447592500	-0.1056573500	-0.0367442550	-0.1105825000	-0.0281381050	-0.1167374500	-0.0210637850	-0.1231307500	-0.0147103200	-0.1276874500	-0.0073866875	-0.1301863500	0.0012583165	-0.1307586000	0.0102083085	-0.1297151000	0.0189191250
0.0032166920	-0.0808343500	-0.0083809690	-0.0825861750	-0.0203062550	-0.0841925600	-0.0310556000	-0.0836077050	-0.0407779650	-0.0837207750	-0.0490351100	-0.0824158900	-0.0563857650	-0.0811083350	-0.0623663000	-0.0794573950	-0.0684084750	-0.0779986000	-0.0749641450	-0.0765776850	-0.0816809800	-0.0744961150	-0.0881293600	-0.0721290900	-0.0946153050	-0.0697660100	-0.1010185150	-0.0664504950	-0.1056105500	-0.0609484200	-0.1101665000	-0.0542507750	-0.1148029500	-0.0465943250	-0.1202199000	-0.0389257750	-0.1241647000	-0.0308802250	-0.1280953500	-0.0231490800	-0.1313482500	-0.0151557100	-0.1329608500	-0.0071011885	-0.1325635500	0.0014053478	-0.1300501000	0.0097764740	-0.1262112000	0.0184183900
0.0036886975	-0.0926956900	-0.0080934155	-0.0938961550	-0.0201320450	-0.0956265350	-0.0306805000	-0.0947071350	-0.0396927950	-0.0937217350	-0.0467639500	-0.0905732400	-0.0531086150	-0.0863288700	-0.0586169450	-0.0822011900	-0.0643720100	-0.0789910300	-0.0683969950	-0.0734115150	-0.0716475050	-0.0667198450	-0.0761909900	-0.0613187900	-0.0828972450	-0.0581442000	-0.0910045550	-0.0554621250	-0.0990381650	-0.0512115350	-0.1076705500	-0.0481442450	-0.1154040500	-0.0436786800	-0.1215378500	-0.0376577900	-0.1258163500	-0.0306305000	-0.1279212500	-0.0225914450	-0.1297985500	-0.0141064500	-0.1323788500	-0.0059489550	-0.1334417500	0.0026831520	-0.1328764500	0.0111062650	-0.1307478000	0.0195290150
0.0050548165	-0.1270258500	-0.0021699580	-0.1255462000	-0.0099336035	-0.1236125500	-0.0166659200	-0.1217308500	-0.0221558550	-0.1179380000	-0.0275303750	-0.1136105500	-0.0333441150	-0.1100214000	-0.0383827650	-0.1063626500	-0.0430652150	-0.1025123500	-0.0463620100	-0.0969108850	-0.0501277100	-0.0905587100	-0.0536592900	-0.0833913100	-0.0571195000	-0.0758421500	-0.0609562200	-0.0673076600	-0.0646016400	-0.0578097350	-0.0681344250	-0.0475072500	-0.0727194750	-0.0369360350	-0.0785311750	-0.0267178550	-0.0849124300	-0.0176013100	-0.0924244800	-0.0100006995	-0.0984850850	-0.0015204855	-0.1019725000	0.0079293040	-0.1055020500	0.0176476050	-0.1076218000	0.0270928200	-0.1068039500	0.0364761200
0.0039514970	-0.0992998250	-0.0078875060	-0.1003993400	-0.0198589700	-0.1018953500	-0.0297936450	-0.1035875500	-0.0377270800	-0.1049182500	-0.0433549100	-0.1042769500	-0.0471199550	-0.1012129800	-0.0500673800	-0.0967027800	-0.0527253550	-0.0919149150	-0.0564158550	-0.0869689850	-0.0619802150	-0.0824704500	-0.0676534000	-0.0774258500	-0.0733771700	-0.0725178850	-0.0804056400	-0.0676722650	-0.0867668150	-0.0610524550	-0.0935315000	-0.0535616250	-0.1005614350	-0.0455664550	-0.1077415500	-0.0376279200	-0.1131060500	-0.0293916700	-0.1169690500	-0.0203791900	-0.1204250500	-0.0111360800	-0.1211466500	-0.0014458870	-0.1199644000	0.0087822940	-0.1196582500	0.0188291000	-0.1176215000	0.0287210650
0.0041111930	-0.1033130500	-0.0063349910	-0.1039838000	-0.0169282150	-0.1050155500	-0.0259135000	-0.1064033000	-0.0334690200	-0.1060631500	-0.0394402000	-0.1043083000	-0.0449494050	-0.1007941250	-0.0504243150	-0.0981837450	-0.0556415250	-0.0949343350	-0.0609078450	-0.0904215600	-0.0661083150	-0.0844562600	-0.0713960800	-0.0780048350	-0.0771683900	-0.0721259650	-0.0826230050	-0.0654349650	-0.0881972600	-0.0583549850	-0.0938231300	-0.0506983250	-0.0994861100	-0.0424216400	-0.1031724000	-0.0330423550	-0.1057989000	-0.0242698400	-0.1082367000	-0.0147311250	-0.1118592500	-0.0052471735	-0.1153455500	0.0042083260	-0.1176390000	0.0141247050	-0.1196405500	0.0235134300	-0.1198222500	0.0325868750
0.0040869395	-0.1027036500	-0.0058415455	-0.1024576500	-0.0160334650	-0.1029958500	-0.0245993050	-0.1029755000	-0.0316344800	-0.1010095500	-0.0376021900	-0.0970685850	-0.0429990650	-0.0926014650	-0.0470612750	-0.0877760350	-0.0512216000	-0.0829618400	-0.0554242000	-0.0774137650	-0.0606049000	-0.0721779900	-0.0669295850	-0.0673912200	-0.0743188650	-0.0635583600	-0.0825306800	-0.0592694100	-0.0910851650	-0.0546213550	-0.0996402850	-0.0495524100	-0.1079783500	-0.0441635050	-0.1152925000	-0.0381132300	-0.1202676500	-0.0310067500	-0.1232605000	-0.0233044850	-0.1263810500	-0.0150892450	-0.1280034500	-0.0066248645	-0.1282506500	0.0026288805	-0.1270605000	0.0120316300	-0.1245058500	0.0215894950
0.0046429000	-0.1166749000	-0.0060655040	-0.1169393500	-0.0170380700	-0.1161729500	-0.0264861600	-0.1144425500	-0.0344289550	-0.1120914500	-0.0408008050	-0.1089040500	-0.0454862350	-0.1042812000	-0.0491389800	-0.0992990950	-0.0518719150	-0.0936797900	-0.0535824200	-0.0868873800	-0.0558682150	-0.0793903650	-0.0596205650	-0.0722692400	-0.0651603050	-0.0664660200	-0.0716163800	-0.0608644400	-0.0768709550	-0.0539729250	-0.0828165700	-0.0465302450	-0.0898833000	-0.0390375750	-0.0978314200	-0.0321777200	-0.1043366500	-0.0252129700	-0.1096414000	-0.0177597750	-0.1137984000	-0.0097749855	-0.1163885500	-0.0011406303	-0.1170906000	0.0084622900	-0.1162850500	0.0181688400	-0.1144222500	0.0280841500
0.0040557705	-0.1019205500	-0.0057811560	-0.1030039500	-0.0157556100	-0.1053397000	-0.0244927600	-0.1068824000	-0.0319970250	-0.1067861000	-0.0382086350	-0.1042392000	-0.0440001300	-0.1013355500	-0.0487487250	-0.0974767450	-0.0531498800	-0.0926573300	-0.0578138800	-0.0868107250	-0.0632180300	-0.0801591050	-0.0688866050	-0.0731966600	-0.0751408700	-0.0665158650	-0.0818817600	-0.0592614450	-0.0890015600	-0.0517487200	-0.0965532900	-0.0443513450	-0.1039695500	-0.0363736450	-0.1103507500	-0.0273148450	-0.1162669000	-0.0189573250	-0.1209550000	-0.0106721865	-0.1252485000	-0.0023948117	-0.1280857500	0.0053544165	-0.1286221000	0.0134585450	-0.1269339000	0.0215042050	-0.1242451500	0.0295529000
0.0022084995	-0.0554991900	-0.0089707320	-0.0575654650	-0.0202791800	-0.0610044900	-0.0299658150	-0.0653967400	-0.0395747450	-0.0682328400	-0.0479038700	-0.0709211500	-0.0555080450	-0.0727821100	-0.0616890300	-0.0742418950	-0.0669350800	-0.0757932100	-0.0723438950	-0.0766891700	-0.0778283400	-0.0762085250	-0.0832031800	-0.0753406600	-0.0884352850	-0.0738120800	-0.0942260450	-0.0712895500	-0.0998498550	-0.0665063100	-0.1061391000	-0.0610852550	-0.1116793000	-0.0541081500	-0.1181065000	-0.0474778450	-0.1232539500	-0.0405079150	-0.1267064500	-0.0326895700	-0.1296808500	-0.0245238900	-0.1310915500	-0.0158783050	-0.1322968500	-0.0064675390	-0.1310271500	0.0030226666	-0.1287880500	0.0128491900
0.0024638280	-0.0619154950	-0.0110974600	-0.0641276200	-0.0249726000	-0.0657142050	-0.0367228650	-0.0685375550	-0.0464009450	-0.0726082600	-0.0538423150	-0.0766172850	-0.0600996150	-0.0797031400	-0.0657212850	-0.0799943700	-0.0711438850	-0.0792771100	-0.0767778700	-0.0776222400	-0.0824747150	-0.0756025800	-0.0877433550	-0.0724988550	-0.0929324800	-0.0697755850	-0.0989941050	-0.0669350000	-0.1053504500	-0.0638025600	-0.1106758500	-0.0586691850	-0.1151438000	-0.0516521500	-0.1199805500	-0.0441176450	-0.1245790500	-0.0368376050	-0.1283231000	-0.0294917550	-0.1314303000	-0.0216488700	-0.1325326000	-0.0132236300	-0.1318710500	-0.0040526800	-0.1310524500	0.0052817450	-0.1280249000	0.0144657800
0.0052064595	-0.1308374000	-0.0022512758	-0.1297356000	-0.0102297660	-0.1271735000	-0.0181035500	-0.1236898000	-0.0254696500	-0.1203644000	-0.0317772000	-0.1164022500	-0.0368820350	-0.1113071000	-0.0415875100	-0.1070893500	-0.0462367050	-0.1025243500	-0.0500510700	-0.0965828650	-0.0537606250	-0.0895471650	-0.0585895750	-0.0828548400	-0.0623810200	-0.0756441150	-0.0651084000	-0.0670147850	-0.0671907250	-0.0571197500	-0.0682824100	-0.0464213350	-0.0708160200	-0.0350758350	-0.0721881300	-0.0237258950	-0.0739656350	-0.0136573350	-0.0775770700	-0.0045449360	-0.0834163650	0.0038562140	-0.0896777000	0.0117140850	-0.0949681700	0.0206767700	-0.0993241800	0.0291851400	-0.1006662250	0.0383153400
0.0046310425	-0.1163772500	-0.0049648620	-0.1167370000	-0.0146488000	-0.1166822500	-0.0229245050	-0.1166083500	-0.0296986400	-0.1142171000	-0.0353283900	-0.1108260000	-0.0407059900	-0.1071455500	-0.0450889800	-0.1027916000	-0.0494221950	-0.0977510600	-0.0539268900	-0.0918237650	-0.0585036400	-0.0848243350	-0.0630058150	-0.0778378900	-0.0663020100	-0.0698713750	-0.0690092800	-0.0607180650	-0.0736374400	-0.0519407200	-0.0785655700	-0.0422205650	-0.0855611000	-0.0328767800	-0.0923504350	-0.0230687600	-0.0993694350	-0.0142000850	-0.1059009500	-0.0059908695	-0.1114817000	0.0030057831	-0.1150925000	0.0124488850	-0.1173795500	0.0221488600	-0.1209775000	0.0302950050	-0.1206321000	0.0386190900
0.0028079645	-0.0705636950	-0.0078713410	-0.0701069200	-0.0183341200	-0.0719425250	-0.0267848900	-0.0764241050	-0.0348437200	-0.0788706400	-0.0419870350	-0.0784209750	-0.0489036000	-0.0778317600	-0.0548679200	-0.0773739050	-0.0606303650	-0.0763636700	-0.0668887100	-0.0767944700	-0.0733374350	-0.0762353350	-0.0800537100	-0.0752308800	-0.0869666900	-0.0739020200	-0.0943297000	-0.0715854700	-0.1011519500	-0.0671026100	-0.1080874000	-0.0618476800	-0.1142090500	-0.0550762950	-0.1191578500	-0.0468319450	-0.1240018500	-0.0387890700	-0.1273267500	-0.0300437200	-0.1297262000	-0.0206020000	-0.1319279500	-0.0110921815	-0.1316133500	-0.0008559492	-0.1307777500	0.0094169665	-0.1287735000	0.0197309700
0.0026361730	-0.0662466600	-0.0097677335	-0.0676129100	-0.0224811000	-0.0707397650	-0.0338353300	-0.0731018850	-0.0436851450	-0.0744051500	-0.0516619250	-0.0755045500	-0.0587813550	-0.0760304100	-0.0641147150	-0.0758758850	-0.0693067900	-0.0755864550	-0.0748566700	-0.0740254500	-0.0808332550	-0.0722641850	-0.0869578200	-0.0705388100	-0.0924567150	-0.0695498350	-0.0991086550	-0.0671838400	-0.1060431000	-0.0639232850	-0.1123517000	-0.0591335200	-0.1181868500	-0.0535046450	-0.1221584500	-0.0463315000	-0.1246356000	-0.0382157050	-0.1267230000	-0.0297250750	-0.1288298500	-0.0208028300	-0.1303295000	-0.0117421450	-0.1304484500	-0.0020575980	-0.1309165000	0.0074396600	-0.1289150000	0.0168683750
0.0043653365	-0.1097002000	-0.0063927695	-0.1097635500	-0.0174506900	-0.1111228000	-0.0268682000	-0.1104568000	-0.0351060300	-0.1103586000	-0.0415736200	-0.1074454500	-0.0477931350	-0.1046948000	-0.0527057800	-0.1016956500	-0.0573741500	-0.0988467700	-0.0610788100	-0.0945831900	-0.0645765150	-0.0888606300	-0.0672797000	-0.0819705800	-0.0699098250	-0.0747796650	-0.0726716150	-0.0666484750	-0.0776100350	-0.0586316800	-0.0827797500	-0.0497141550	-0.0887322200	-0.0405112000	-0.0957285600	-0.0317406950	-0.1019068000	-0.0233872800	-0.1072558000	-0.0152215850	-0.1103483500	-0.0060278150	-0.1117976500	0.0036126780	-0.1126635000	0.0135021900	-0.1120411000	0.0228488600	-0.1102675000	0.0318548000
0.0041450960	-0.1041657500	-0.0044872205	-0.1050380000	-0.0129843850	-0.1068066500	-0.0205163100	-0.1057324000	-0.0266996800	-0.1019573500	-0.0322430700	-0.0973938800	-0.0369568150	-0.0919270400	-0.0414130800	-0.0868950200	-0.0460517450	-0.0820306900	-0.0518350150	-0.0777421750	-0.0584169250	-0.0734158800	-0.0655116400	-0.0697389900	-0.0734314750	-0.0673905600	-0.0820895750	-0.0646367200	-0.0903120250	-0.0603520800	-0.0976391300	-0.0544908750	-0.1037283500	-0.0466637350	-0.1086626500	-0.0374861150	-0.1134804000	-0.0283624700	-0.1173118500	-0.0189631350	-0.1201065500	-0.0090504835	-0.1226422000	0.0006669255	-0.1254710500	0.0106046200	-0.1267396000	0.0203726200	-0.1255929500	0.0300580150
0.0036312550	-0.0912530950	-0.0074442340	-0.0910005400	-0.0189776900	-0.0902018250	-0.0292428200	-0.0885937600	-0.0383719850	-0.0863847500	-0.0461731100	-0.0831781450	-0.0535324500	-0.0802400250	-0.0601281950	-0.0775479350	-0.0665430750	-0.0747506600	-0.0736701450	-0.0720833700	-0.0811250750	-0.0692273600	-0.0887479300	-0.0665738900	-0.0963411300	-0.0641575100	-0.1042337000	-0.0620705800	-0.1107341500	-0.0579920450	-0.1160579500	-0.0521723250	-0.1200890000	-0.0452698300	-0.1228190000	-0.0374154550	-0.1249819500	-0.0292839950	-0.1275199500	-0.0213011050	-0.1306263000	-0.0136695200	-0.1323571000	-0.0057574545	-0.1324136000	0.0027079355	-0.1302659500	0.0110648375	-0.1266804500	0.0195295050
0.0035194325	-0.0884430450	-0.0070952080	-0.0888938700	-0.0180718800	-0.0906263950	-0.0278661950	-0.0908701900	-0.0364493050	-0.0874663500	-0.0444976000	-0.0844177850	-0.0521939950	-0.0817075750	-0.0591857500	-0.0804108300	-0.0658295000	-0.0785555750	-0.0729044050	-0.0768564750	-0.0798899850	-0.0744963450	-0.0864279500	-0.0713400200	-0.0924685550	-0.0672331200	-0.0988222800	-0.0624418650	-0.1055405000	-0.0575124950	-0.1118491500	-0.0515323850	-0.1174270500	-0.0444099650	-0.1223398000	-0.0369380650	-0.1257127000	-0.0296744500	-0.1274812500	-0.0220442050	-0.1279746000	-0.0137891000	-0.1285276000	-0.0053541215	-0.1284758500	0.0038643535	-0.1278683500	0.0131304950	-0.1258348000	0.0224762100
0.0027401975	-0.0688608750	-0.0104336300	-0.0688460000	-0.0238746950	-0.0705414100	-0.0358616250	-0.0713638250	-0.0462855600	-0.0722983300	-0.0549165300	-0.0733477650	-0.0625740950	-0.0741056950	-0.0689595750	-0.0742685850	-0.0747697450	-0.0724660600	-0.0812971500	-0.0709787650	-0.0879795200	-0.0693332350	-0.0945446800	-0.0670465450	-0.1007746000	-0.0637984700	-0.1070477500	-0.0594820550	-0.1132399000	-0.0547305250	-0.1195290500	-0.0499464900	-0.1248616500	-0.0442240250	-0.1289279000	-0.0378561350	-0.1313005000	-0.0309890000	-0.1324515500	-0.0237867050	-0.1322157500	-0.0165048450	-0.1314275500	-0.0088519290	-0.1310198000	-0.0006285581	-0.1307615500	0.0077023710	-0.1292706000	0.0162196200
0.0039837105	-0.1001103650	-0.0058516515	-0.1011772500	-0.0161102750	-0.1005427500	-0.0254148800	-0.1004706250	-0.0334356250	-0.0992544300	-0.0401965800	-0.0961318650	-0.0468914500	-0.0929748900	-0.0528924150	-0.0902002650	-0.0589922100	-0.0877452250	-0.0652325200	-0.0841651700	-0.0719067950	-0.0799658600	-0.0783891250	-0.0750781450	-0.0844318250	-0.0694691600	-0.0906965050	-0.0631610950	-0.0968957650	-0.0561132250	-0.1031598000	-0.0483860250	-0.1096610500	-0.0404089200	-0.1155760500	-0.0320183400	-0.1200841500	-0.0236101150	-0.1227166000	-0.0147433950	-0.1251360500	-0.0055971875	-0.1263908000	0.0034178925	-0.1263913500	0.0127344550	-0.1261309500	0.0216502450	-0.1247639500	0.0298508500
0.0033892945	-0.0851727750	-0.0069673095	-0.0862923000	-0.0178967300	-0.0865288300	-0.0275952300	-0.0870713350	-0.0359959700	-0.0874657300	-0.0431403150	-0.0858735250	-0.0501895350	-0.0844271700	-0.0560538950	-0.0816733200	-0.0618253100	-0.0785704500	-0.0678891750	-0.0744857350	-0.0744365700	-0.0698825900	-0.0812598650	-0.0650836200	-0.0882807700	-0.0601947900	-0.0957318600	-0.0544279750	-0.1030254500	-0.0478339750	-0.1101834500	-0.0406036250	-0.1177299000	-0.0335587150	-0.1233104000	-0.0249558950	-0.1285536000	-0.0170109400	-0.1329086500	-0.0091698280	-0.1370324000	-0.0014574365	-0.1397504500	0.0061051070	-0.1404993500	0.0136655750	-0.1398709000	0.0211806450	-0.1381959500	0.0282320600
0.0043043330	-0.1081676000	-0.0084752250	-0.1088453500	-0.0213101750	-0.1091902500	-0.0320194200	-0.1077414500	-0.0411242450	-0.1085298500	-0.0486206350	-0.1076474000	-0.0550878350	-0.1063197000	-0.0594150450	-0.1049295500	-0.0619952900	-0.1020981500	-0.0658141900	-0.0982975300	-0.0698399600	-0.0941318100	-0.0739858950	-0.0892886500	-0.0773923300	-0.0841299000	-0.0808025100	-0.0794686800	-0.0825295600	-0.0724785100	-0.0827075350	-0.0643554900	-0.0821968050	-0.0552364500	-0.0813585550	-0.0449615350	-0.0795415100	-0.0348110900	-0.0766264450	-0.0243721800	-0.0749181750	-0.0131298000	-0.0709845200	-0.0024926140	-0.0692548700	0.0090513230	-0.0686935400	0.0203483650	-0.0701241150	0.0319194400
0.0044346430	-0.1114424500	-0.0055725845	-0.1127101000	-0.0157036150	-0.1143071000	-0.0243728350	-0.1151617000	-0.0313907950	-0.1157239500	-0.0374401250	-0.1138244500	-0.0431681900	-0.1117228000	-0.0473387900	-0.1084832000	-0.0505645300	-0.1040615500	-0.0550242800	-0.0995946150	-0.0593364650	-0.0939714600	-0.0630538500	-0.0878705250	-0.0658083750	-0.0808363750	-0.0684095800	-0.0726178500	-0.0705530850	-0.0631808200	-0.0729492900	-0.0526721300	-0.0756974000	-0.0414510750	-0.0776071100	-0.0298372700	-0.0795292600	-0.0191812100	-0.0813345600	-0.0100182090	-0.0840297650	-0.0019031944	-0.0889380000	0.0057118175	-0.0943252100	0.0136725300	-0.0970249700	0.0229297800	-0.0994574350	0.0322200200
0.0027167265	-0.0682712700	-0.0081329375	-0.0695050400	-0.0190215600	-0.0732324000	-0.0288850150	-0.0762256550	-0.0376326550	-0.0780161800	-0.0454506800	-0.0777353650	-0.0527308600	-0.0779692400	-0.0590536200	-0.0775705550	-0.0651877000	-0.0773106450	-0.0715767650	-0.0758697800	-0.0782882000	-0.0743120600	-0.0851327600	-0.0728014550	-0.0918990450	-0.0706897550	-0.0985625650	-0.0665162650	-0.1053838500	-0.0615704900	-0.1123286500	-0.0559311150	-0.1188682500	-0.0494532750	-0.1245816500	-0.0422513600	-0.1292689000	-0.0351395950	-0.1320548500	-0.0275073350	-0.1336433500	-0.0192967550	-0.1343922500	-0.0107227900	-0.1339524500	-0.0014417015	-0.1326422000	0.0079419420	-0.1302234000	0.0173406050
0.0030535345	-0.0767352500	-0.0095095810	-0.0778158900	-0.0225600200	-0.0784501250	-0.0340137450	-0.0778303050	-0.0438480850	-0.0769162000	-0.0520207000	-0.0779483950	-0.0592605850	-0.0774238650	-0.0652221100	-0.0758097850	-0.0706949500	-0.0727744500	-0.0770131300	-0.0698756400	-0.0836248350	-0.0662055550	-0.0902532000	-0.0622087800	-0.0976834200	-0.0597577750	-0.1056649000	-0.0571460000	-0.1134347500	-0.0543632250	-0.1203772000	-0.0509952150	-0.1252268000	-0.0452466400	-0.1302403500	-0.0393135000	-0.1326693500	-0.0323250000	-0.1351928000	-0.0253409100	-0.1361856500	-0.0176810750	-0.1365386500	-0.0099068475	-0.1351126500	-0.0020242120	-0.1308520000	0.0050582000	-0.1259172000	0.0130267350
0.0027136275	-0.0681934650	-0.0103853915	-0.0697064800	-0.0243247450	-0.0712085450	-0.0365320000	-0.0740079350	-0.0471865700	-0.0766821150	-0.0561991700	-0.0780022050	-0.0643110350	-0.0776579500	-0.0710476550	-0.0765838000	-0.0773172550	-0.0752966550	-0.0835257000	-0.0725887700	-0.0896166450	-0.0691521400	-0.0961028100	-0.0666516000	-0.1022609500	-0.0646819800	-0.1067350000	-0.0598075900	-0.1126155500	-0.0553627950	-0.1183318000	-0.0499236350	-0.1235524500	-0.0436420000	-0.1282759500	-0.0373044950	-0.1314322000	-0.0307127900	-0.1333694500	-0.0235841300	-0.1350786000	-0.0160336300	-0.1354690000	-0.0080797265	-0.1348195500	0.0003555709	-0.1317500500	0.0084461390	-0.1275301500	0.0165926850
0.0050759225	-0.1275579000	-0.0026836675	-0.1272530500	-0.0107452600	-0.1264335500	-0.0174938050	-0.1236707000	-0.0237333050	-0.1220487000	-0.0287742600	-0.1183737000	-0.0328056650	-0.1134760500	-0.0369567850	-0.1092099500	-0.0402890500	-0.1042123500	-0.0453285500	-0.1000432050	-0.0489310450	-0.0936652150	-0.0522544400	-0.0866852450	-0.0552243100	-0.0796495650	-0.0582643100	-0.0713473600	-0.0616994350	-0.0621051850	-0.0646959850	-0.0517704100	-0.0685034200	-0.0406606500	-0.0723259500	-0.0290735950	-0.0777591300	-0.0184331600	-0.0827322050	-0.0078646820	-0.0867587750	0.0032238405	-0.0892655450	0.0142292550	-0.0914439050	0.0253370450	-0.0922914300	0.0362484450	-0.0930307550	0.0465929000
0.0040472145	-0.1017065600	-0.0065471480	-0.1019547750	-0.0175069250	-0.1010760950	-0.0272607900	-0.1004142550	-0.0357268200	-0.0984611700	-0.0427772600	-0.0953768100	-0.0493445350	-0.0925979000	-0.0545832450	-0.0895356900	-0.0600326300	-0.0865794200	-0.0656892900	-0.0827857200	-0.0718033350	-0.0795536750	-0.0784638100	-0.0759449050	-0.0847666400	-0.0713112650	-0.0915900650	-0.0661001550	-0.0986433000	-0.0603457100	-0.1042667500	-0.0526510600	-0.1096947500	-0.0441410050	-0.1146297500	-0.0351463800	-0.1189344500	-0.0266501900	-0.1225925500	-0.0184141000	-0.1242256500	-0.0097552020	-0.1238887000	-0.0003915420	-0.1237538500	0.0097681750	-0.1221340500	0.0198354700	-0.1195249500	0.0299583650
0.0040616530	-0.1020693550	-0.0084744475	-0.1020046500	-0.0211616900	-0.1005893450	-0.0327573950	-0.0990035350	-0.0426056650	-0.0978293300	-0.0512501550	-0.0963877550	-0.0586734050	-0.0929024850	-0.0654289350	-0.0907524850	-0.0712685000	-0.0878693550	-0.0779116000	-0.0851655650	-0.0828966500	-0.0805660700	-0.0879457750	-0.0767217650	-0.0932504100	-0.0729482100	-0.0987420850	-0.0688015350	-0.1021114500	-0.0618043950	-0.1069097000	-0.0548933300	-0.1095357000	-0.0462660550	-0.1130271500	-0.0377044950	-0.1123072000	-0.0288267850	-0.1138789000	-0.0204201300	-0.1142004500	-0.0112453155	-0.1150707500	-0.0015453355	-0.1134389000	0.0085447565	-0.1119721500	0.0184060450	-0.1090931500	0.0284692450
0.0043593515	-0.1095505500	-0.0031620690	-0.1093628500	-0.0101585245	-0.1123272000	-0.0161226300	-0.1130612500	-0.0211443300	-0.1107601000	-0.0250357150	-0.1059028000	-0.0285538500	-0.1003711450	-0.0324494900	-0.0954889700	-0.0355039050	-0.0899211550	-0.0400714400	-0.0844406450	-0.0462279400	-0.0792758950	-0.0539298600	-0.0754462200	-0.0619894250	-0.0720779600	-0.0705454650	-0.0687141900	-0.0787284800	-0.0638112000	-0.0865190450	-0.0572947550	-0.0937607300	-0.0492729650	-0.1002024700	-0.0399997500	-0.1057360000	-0.0305383900	-0.1097825500	-0.0206388750	-0.1132356000	-0.0104166135	-0.1165435500	-0.0004003970	-0.1184945500	0.0097176180	-0.1182424000	0.0197381700	-0.1168786000	0.0298276400
0.0037465645	-0.0941513150	-0.0059197540	-0.0933366050	-0.0158813600	-0.0913322600	-0.0248745900	-0.0900053450	-0.0327730100	-0.0880276000	-0.0397129000	-0.0851310300	-0.0459702900	-0.0812639650	-0.0519217650	-0.0785179400	-0.0575495550	-0.0754160800	-0.0640378850	-0.0728071900	-0.0709501850	-0.0700591500	-0.0785713400	-0.0686145500	-0.0861233450	-0.0665253700	-0.0939540950	-0.0630507950	-0.1015627500	-0.0589472750	-0.1085455000	-0.0539695300	-0.1149667500	-0.0481948600	-0.1210752500	-0.0419444400	-0.1249388000	-0.0346568200	-0.1274149000	-0.0267563900	-0.1295200500	-0.0183005700	-0.1300658000	-0.0094130045	-0.1300491000	0.0001146648	-0.1286803000	0.0096608290	-0.1260107000	0.0194013500
0.0025633280	-0.0644165850	-0.0091899100	-0.0668532750	-0.0213616700	-0.0707180400	-0.0325818650	-0.0734307400	-0.0427210000	-0.0745597600	-0.0511288900	-0.0752152300	-0.0586728350	-0.0748731900	-0.0647355650	-0.0732881100	-0.0700833300	-0.0713837800	-0.0753729550	-0.0698130150	-0.0809621900	-0.0683744600	-0.0868850450	-0.0687429300	-0.0928179400	-0.0704609550	-0.0991771300	-0.0694559400	-0.1052162000	-0.0656990850	-0.1114910000	-0.0608714050	-0.1167891000	-0.0540881550	-0.1217717500	-0.0462499250	-0.1261993500	-0.0383304650	-0.1296617500	-0.0300485450	-0.1316179000	-0.0211880600	-0.1311921500	-0.0119174285	-0.1326638000	-0.0022921085	-0.1320020500	0.0069641275	-0.1286759000	0.0159259500
0.0034480330	-0.0866492050	-0.0099940945	-0.0883344800	-0.0239190550	-0.0891404500	-0.0364343300	-0.0886811700	-0.0474575100	-0.0884535700	-0.0567598900	-0.0875880600	-0.0649648550	-0.0865857300	-0.0715869850	-0.0852232700	-0.0775502650	-0.0840787200	-0.0828355300	-0.0809415000	-0.0874242650	-0.0760137600	-0.0919947750	-0.0707255350	-0.0963828250	-0.0653374700	-0.1018113000	-0.0606068950	-0.1078473000	-0.0560091850	-0.1138017500	-0.0512900450	-0.1181457500	-0.0453536850	-0.1198881000	-0.0375241450	-0.1223072000	-0.0296246950	-0.1245057500	-0.0215243400	-0.1262612500	-0.0131323950	-0.1263552000	-0.0043975520	-0.1263143500	0.0049094280	-0.1239267000	0.0139086200	-0.1203413000	0.0230401200
0.0026582795	-0.0668026800	-0.0101171425	-0.0695410150	-0.0236154650	-0.0736664100	-0.0358646550	-0.0762446350	-0.0464550450	-0.0782767000	-0.0551612700	-0.0789394950	-0.0627041200	-0.0780031400	-0.0688108950	-0.0762103300	-0.0744327100	-0.0737410900	-0.0800063450	-0.0704315100	-0.0856597700	-0.0667218350	-0.0909122800	-0.0626463600	-0.0974153800	-0.0607826400	-0.1045989000	-0.0590688900	-0.1111797500	-0.0561088750	-0.1157078500	-0.0525673800	-0.1191352000	-0.0478869950	-0.1238612500	-0.0422004350	-0.1282589500	-0.0364456450	-0.1305817000	-0.0298016000	-0.1310293000	-0.0224822350	-0.1289320500	-0.0149000550	-0.1271849000	-0.0061063140	-0.1263691500	0.0032536925	-0.1251553000	0.0130107200
0.0016062390	-0.0997205200	-0.0077965195	-0.1010736900	-0.0174128100	-0.1014003350	-0.0258411150	-0.1022344250	-0.0333124250	-0.1019413600	-0.0398241750	-0.0997120650	-0.0461882650	-0.0968917450	-0.0533051100	-0.0947403900	-0.0600218250	-0.0914994850	-0.0670133300	-0.0878917900	-0.0743540700	-0.0844717500	-0.0807765450	-0.0797681500	-0.0864372550	-0.0738464050	-0.0922236350	-0.0671995450	-0.0970216550	-0.0598560100	-0.1015222500	-0.0515455650	-0.1072637500	-0.0438550000	-0.1104612000	-0.0346428550	-0.1120817500	-0.0255283150	-0.1152293000	-0.0162159600	-0.1164993500	-0.0061461175	-0.1159475500	0.0039652405	-0.1152806500	0.0137311000	-0.1129169000	0.0231898100	-0.1114657500	0.0327375500
0.0015572075	-0.0966762500	-0.0081521380	-0.0971137850	-0.0175333950	-0.0994160400	-0.0251938950	-0.1011365000	-0.0329963300	-0.1000959350	-0.0399486500	-0.0988525650	-0.0463343300	-0.0955971850	-0.0531020750	-0.0921527800	-0.0592180250	-0.0875552500	-0.0652949050	-0.0825686550	-0.0712897850	-0.0775397050	-0.0751921700	-0.0708969500	-0.0799720850	-0.0636798400	-0.0860218150	-0.0562303550	-0.0925139550	-0.0491975700	-0.0990889950	-0.0413855000	-0.1066323000	-0.0344143250	-0.1127655500	-0.0262752300	-0.1182366000	-0.0188347900	-0.1225816000	-0.0106650600	-0.1257394500	-0.0020817755	-0.1271257000	0.0067486680	-0.1278770000	0.0152429500	-0.1266532500	0.0236376050	-0.1241187000	0.0319078350
0.0011370765	-0.0705932150	-0.0099280335	-0.0713420350	-0.0211080950	-0.0730740150	-0.0302875650	-0.0760862750	-0.0392088550	-0.0768841650	-0.0468313800	-0.0770509500	-0.0538998500	-0.0757826200	-0.0608315650	-0.0735421300	-0.0675675400	-0.0702616400	-0.0748931250	-0.0673427550	-0.0828763050	-0.0648991000	-0.0905801050	-0.0619665950	-0.0981959800	-0.0594514400	-0.1054312000	-0.0551410450	-0.1121771000	-0.0505025700	-0.1187485500	-0.0455075950	-0.1245418500	-0.0397018800	-0.1286595000	-0.0324604000	-0.1325671500	-0.0260476850	-0.1344996000	-0.0185553250	-0.1359190000	-0.0104425440	-0.1364077000	-0.0023623655	-0.1352408500	0.0054633925	-0.1338020000	0.0132339650	-0.1309640500	0.0210232050
0.0010140153	-0.0629534100	-0.0093849665	-0.0637141950	-0.0200932300	-0.0651354800	-0.0294799850	-0.0673246250	-0.0380751650	-0.0695274200	-0.0456080100	-0.0709914850	-0.0526230400	-0.0725098900	-0.0599998750	-0.0736788950	-0.0674840250	-0.0738489850	-0.0749545300	-0.0728494150	-0.0826417200	-0.0717652750	-0.0900720050	-0.0700926250	-0.0972645550	-0.0678400700	-0.1042797500	-0.0642245850	-0.1106411000	-0.0604383200	-0.1157683500	-0.0550474350	-0.1198553500	-0.0483097250	-0.1234673000	-0.0408031300	-0.1257879000	-0.0331151650	-0.1280541500	-0.0248131100	-0.1297825000	-0.0161654000	-0.1298655000	-0.0072177260	-0.1300919500	0.0014613410	-0.1294733000	0.0101788600	-0.1275348500	0.0188147150
0.0013268340	-0.0823742850	-0.0112965750	-0.0838498200	-0.0240202050	-0.0869851000	-0.0349321900	-0.0895862550	-0.0444780000	-0.0917303700	-0.0523179700	-0.0914073050	-0.0594496250	-0.0885224800	-0.0673437850	-0.0867779050	-0.0748737000	-0.0834725300	-0.0823788750	-0.0799353400	-0.0896194550	-0.0755138250	-0.0959587350	-0.0698492100	-0.1023334500	-0.0638842300	-0.1089356000	-0.0578014350	-0.1144332500	-0.0506348450	-0.1195468000	-0.0426449250	-0.1237226000	-0.0340422150	-0.1271287000	-0.0251118550	-0.1289143000	-0.0168725050	-0.1288480000	-0.0080549780	-0.1279250500	0.0009614850	-0.1261746500	0.0098249230	-0.1260543000	0.0184598100	-0.1253132000	0.0269398850	-0.1228139500	0.0348474350
0.0016560345	-0.1028122000	-0.0079949825	-0.1009258500	-0.0177696150	-0.0978406300	-0.0263501050	-0.0961628150	-0.0347182050	-0.0955517950	-0.0419908950	-0.0941046550	-0.0491063750	-0.0930618700	-0.0564157000	-0.0918257950	-0.0633777650	-0.0892437400	-0.0700168300	-0.0862304900	-0.0754810500	-0.0811638500	-0.0809175150	-0.0758724200	-0.0849119350	-0.0690954100	-0.0887438150	-0.0611777550	-0.0935770900	-0.0536319750	-0.0992237100	-0.0460340750	-0.1059714000	-0.0394917750	-0.1124779500	-0.0326091250	-0.1170650000	-0.0256860300	-0.1214619000	-0.0182874900	-0.1237432000	-0.0101100575	-0.1229623000	-0.0014071425	-0.1219920000	0.0073785080	-0.1204034000	0.0164185200	-0.1177851500	0.0255918450
0.0021124170	-0.1311461500	-0.0050070945	-0.1305347500	-0.0119918450	-0.1269600500	-0.0183935000	-0.1230525000	-0.0247627550	-0.1188164000	-0.0301084150	-0.1135929000	-0.0357027150	-0.1073276500	-0.0411921750	-0.1003740150	-0.0471794800	-0.0941271550	-0.0536753550	-0.0886542550	-0.0593780100	-0.0816711150	-0.0652758750	-0.0742408800	-0.0711130950	-0.0660178950	-0.0781481300	-0.0578020000	-0.0839142700	-0.0489572150	-0.0895715350	-0.0396689100	-0.0961352750	-0.0313893500	-0.1000021100	-0.0221925200	-0.1014077500	-0.0132587900	-0.1020059500	-0.0036443630	-0.1017794500	0.0060823825	-0.1016945500	0.0158923500	-0.1007658500	0.0251347700	-0.1019447500	0.0338939000	-0.1033377000	0.0422846750
0.0015959155	-0.0990799300	-0.0102762730	-0.1005613500	-0.0223932450	-0.1037725500	-0.0326332200	-0.1070591500	-0.0414118450	-0.1085709500	-0.0477255700	-0.1088448500	-0.0518093050	-0.1059468000	-0.0559106650	-0.1016267500	-0.0609958400	-0.0969568650	-0.0652507900	-0.0910790550	-0.0686433250	-0.0836860400	-0.0728411150	-0.0762464100	-0.0773494350	-0.0681673350	-0.0823094150	-0.0592600000	-0.0882188850	-0.0510317150	-0.0938793950	-0.0416632800	-0.0989692500	-0.0317408900	-0.1043523000	-0.0221011150	-0.1078724000	-0.0128455750	-0.1116264500	-0.0033031995	-0.1146831000	0.0064089640	-0.1160343500	0.0161892300	-0.1176254500	0.0250654600	-0.1178664500	0.0334420300	-0.1179460000	0.0411121000
0.0017106440	-0.1062028500	-0.0096877780	-0.1073334000	-0.0211903850	-0.1090015000	-0.0309747250	-0.1104749000	-0.0396065700	-0.1105253000	-0.0462907400	-0.1092807000	-0.0517637800	-0.1054790500	-0.0574124000	-0.1010529750	-0.0620173300	-0.0957489250	-0.0654597950	-0.0887593700	-0.0693666350	-0.0814547350	-0.0736724750	-0.0740509600	-0.0776803300	-0.0660811800	-0.0828009850	-0.0581009850	-0.0890051050	-0.0512317400	-0.0936669100	-0.0429599550	-0.0978692100	-0.0341594550	-0.1011963500	-0.0246197900	-0.1024251000	-0.0153435250	-0.1052482500	-0.0064203580	-0.1089953000	0.0018306125	-0.1124374500	0.0097639175	-0.1145759000	0.0176042200	-0.1149959500	0.0261786750	-0.1151068000	0.0347802000
0.0012705610	-0.0788812150	-0.0107551700	-0.0788925050	-0.0228814850	-0.0801139400	-0.0322883650	-0.0843463800	-0.0410605800	-0.0870489750	-0.0469835050	-0.0897503600	-0.0518031150	-0.0902815400	-0.0577953350	-0.0893960950	-0.0642042750	-0.0880494200	-0.0708096950	-0.0856444800	-0.0770201650	-0.0814026350	-0.0840849050	-0.0783630050	-0.0905544150	-0.0739345750	-0.0967042350	-0.0679459000	-0.1030997000	-0.0622348650	-0.1086735000	-0.0550050450	-0.1134859000	-0.0471727050	-0.1165403500	-0.0383088350	-0.1186055000	-0.0299729500	-0.1201491500	-0.0209421650	-0.1191613500	-0.0109963120	-0.1191040500	-0.0011274792	-0.1167600000	0.0078659185	-0.1138491500	0.0165700500	-0.1104511500	0.0252312700
0.0015168615	-0.0941723650	-0.0075003990	-0.0949031550	-0.0174027350	-0.0955651100	-0.0261481200	-0.0947415950	-0.0340485650	-0.0927978300	-0.0402418250	-0.0893591200	-0.0456886850	-0.0839626950	-0.0532679400	-0.0805723800	-0.0616549650	-0.0773074950	-0.0704331100	-0.0746929200	-0.0790802800	-0.0709137700	-0.0874049850	-0.0669856150	-0.0949747300	-0.0620230100	-0.1016531950	-0.0553494950	-0.1065670000	-0.0476087750	-0.1095923000	-0.0385496750	-0.1140699000	-0.0305114100	-0.1195382000	-0.0237365800	-0.1244829000	-0.0184281900	-0.1289313000	-0.0121727300	-0.1321447000	-0.0052212705	-0.1329508000	0.0021245195	-0.1328767500	0.0092298785	-0.1313033000	0.0165544000	-0.1290393000	0.0240996350
0.0011206130	-0.0695719500	-0.0099052100	-0.0701585800	-0.0212087200	-0.0711552350	-0.0307938400	-0.0718210300	-0.0391072600	-0.0713110650	-0.0457089350	-0.0698331450	-0.0521868700	-0.0684173000	-0.0595846750	-0.0685978250	-0.0672890050	-0.0689404500	-0.0748605450	-0.0683107550	-0.0825520900	-0.0662277850	-0.0903446200	-0.0644147200	-0.0974958500	-0.0609126900	-0.1050006500	-0.0568166450	-0.1125594000	-0.0543169700	-0.1189136000	-0.0507686050	-0.1235804000	-0.0455749250	-0.1262972500	-0.0387064700	-0.1290756500	-0.0319195100	-0.1306746500	-0.0242571050	-0.1321550000	-0.0159734400	-0.1316841500	-0.0074228355	-0.1313113500	0.0010541020	-0.1298508500	0.0095942530	-0.1273880500	0.0180805200
0.0018577390	-0.1153356500	-0.0076500255	-0.1147255500	-0.0174590900	-0.1135452000	-0.0259701050	-0.1114503500	-0.0335970150	-0.1082720000	-0.0402791850	-0.1040185000	-0.0462375900	-0.0981831250	-0.0521108600	-0.0916013550	-0.0579232550	-0.0848048050	-0.0639277850	-0.0780234700	-0.0697945150	-0.0709980900	-0.0750096150	-0.0642897550	-0.0808242300	-0.0579202650	-0.0870031850	-0.0512751950	-0.0924289700	-0.0444997950	-0.0993662000	-0.0381695650	-0.1067840500	-0.0320197350	-0.1132520500	-0.0251811900	-0.1180882000	-0.0184856350	-0.1221254500	-0.0115252800	-0.1246341500	-0.0039180915	-0.1242184000	0.0039093115	-0.1227478500	0.0112415400	-0.1203958500	0.0189949900	-0.1172034000	0.0269455500
0.0012763595	-0.0792413700	-0.0098015405	-0.0791057650	-0.0212173800	-0.0798725900	-0.0311874700	-0.0807775400	-0.0402620400	-0.0806806300	-0.0479858450	-0.0794188400	-0.0554355750	-0.0785459200	-0.0630477800	-0.0779175950	-0.0699621650	-0.0751777550	-0.0766345900	-0.0722424100	-0.0838176150	-0.0693204700	-0.0911076700	-0.0667598500	-0.0980149750	-0.0635588200	-0.1052713000	-0.0607400000	-0.1108310000	-0.0560752750	-0.1158367000	-0.0505593450	-0.1199608000	-0.0443367400	-0.1225033500	-0.0370742550	-0.1240215500	-0.0300341600	-0.1268949500	-0.0227401400	-0.1278490500	-0.0143433400	-0.1283823000	-0.0059094975	-0.1279136000	0.0026224450	-0.1270656500	0.0112996850	-0.1248781500	0.0199281150
0.0017249730	-0.1070936000	-0.0081528615	-0.1059722350	-0.0182899050	-0.1047331750	-0.0267203750	-0.1014257400	-0.0346026500	-0.0992146300	-0.0412965550	-0.0958686200	-0.0483477650	-0.0928182650	-0.0550909250	-0.0884478000	-0.0615739800	-0.0842888250	-0.0683806350	-0.0797412550	-0.0755417950	-0.0748936050	-0.0823185550	-0.0698910550	-0.0888321600	-0.0645459250	-0.0948356850	-0.0581671500	-0.1013787350	-0.0526631100	-0.1075013000	-0.0465017300	-0.1129377500	-0.0401057150	-0.1164856000	-0.0325275650	-0.1182711500	-0.0248363700	-0.1200319000	-0.0170625400	-0.1204583500	-0.0085213265	-0.1189967000	0.0002910865	-0.1177137000	0.0090659320	-0.1149798500	0.0174319150	-0.1116833500	0.0261717600
0.0015761235	-0.0978522300	-0.0087608020	-0.0980228450	-0.0199659300	-0.0993680300	-0.0289667050	-0.1002657000	-0.0364368350	-0.1018617000	-0.0423957500	-0.1012122500	-0.0477507200	-0.0985089150	-0.0540207050	-0.0965709650	-0.0597407150	-0.0938860100	-0.0648443050	-0.0898045950	-0.0705206300	-0.0851867100	-0.0759890400	-0.0805489950	-0.0803459550	-0.0747897200	-0.0853177650	-0.0677538550	-0.0905776250	-0.0604763150	-0.0952021950	-0.0519255500	-0.0993542900	-0.0428497500	-0.1040563000	-0.0337479050	-0.1083346000	-0.0254021250	-0.1125933500	-0.0167393550	-0.1150999500	-0.0071412295	-0.1160290500	0.0025825270	-0.1161816000	0.0118312000	-0.1140247500	0.0208038550	-0.1115925000	0.0300467450
0.0016118500	-0.1000703250	-0.0100564730	-0.1006204600	-0.0221240150	-0.1024805500	-0.0327388100	-0.1022016000	-0.0421499800	-0.1025452000	-0.0494022550	-0.1017490000	-0.0555337450	-0.0985866450	-0.0605084050	-0.0935692550	-0.0654451800	-0.0878105200	-0.0714244550	-0.0821315050	-0.0772067850	-0.0756932700	-0.0824123750	-0.0693204850	-0.0882890500	-0.0627721400	-0.0947334050	-0.0561633350	-0.0998540850	-0.0484217000	-0.1050317000	-0.0402855250	-0.1113271000	-0.0330400250	-0.1170043500	-0.0257612550	-0.1209671000	-0.0190861150	-0.1244794000	-0.0118752850	-0.1252476500	-0.0036906190	-0.1243788500	0.0046797385	-0.1217656500	0.0127535550	-0.1189910000	0.0212161850	-0.1156852500	0.0299275400
0.0013329465	-0.0827548800	-0.0110083800	-0.0832097400	-0.0236812150	-0.0832092850	-0.0344383250	-0.0837316850	-0.0437801800	-0.0843888800	-0.0514477350	-0.0830117750	-0.0586473500	-0.0815855450	-0.0656701500	-0.0787543400	-0.0727934450	-0.0765488050	-0.0796035050	-0.0740925000	-0.0865803350	-0.0719699150	-0.0932317850	-0.0690764050	-0.0988064550	-0.0637921500	-0.1051341000	-0.0583302300	-0.1107284500	-0.0529698150	-0.1142858000	-0.0461041300	-0.1180832000	-0.0387046600	-0.1229404000	-0.0321577250	-0.1270641500	-0.0265352950	-0.1293897500	-0.0197017300	-0.1304199000	-0.0122277800	-0.1294012000	-0.0047461370	-0.1267635000	0.0027917335	-0.1235637000	0.0108041405	-0.1201054000	0.0192648400
0.0012842355	-0.0797309000	-0.0095857220	-0.0803723000	-0.0206892450	-0.0815460550	-0.0302360050	-0.0830881100	-0.0389383150	-0.0826052250	-0.0460737900	-0.0796840850	-0.0529485650	-0.0764625050	-0.0602035550	-0.0738017650	-0.0680850750	-0.0731770300	-0.0759168950	-0.0729249950	-0.0833677450	-0.0711317200	-0.0898168550	-0.0681079350	-0.0953836000	-0.0631980950	-0.1012613500	-0.0575735150	-0.1072123000	-0.0525750900	-0.1124727500	-0.0461794600	-0.1183304500	-0.0397877400	-0.1236017500	-0.0328741450	-0.1283592000	-0.0267655550	-0.1311572500	-0.0195317900	-0.1326687500	-0.0116651450	-0.1333232000	-0.0038577705	-0.1331238000	0.0037595790	-0.1307950000	0.0114187450	-0.1279686000	0.0194242100
0.0012786490	-0.0793841750	-0.0104904100	-0.0787839000	-0.0225101400	-0.0779896150	-0.0327562250	-0.0769530350	-0.0418298200	-0.0758810700	-0.0492686800	-0.0749898250	-0.0564592650	-0.0753583900	-0.0639936900	-0.0753812400	-0.0714967250	-0.0758259700	-0.0784664000	-0.0738914100	-0.0851127400	-0.0702937500	-0.0917134950	-0.0671681250	-0.0985203200	-0.0636290350	-0.1054326000	-0.0591677650	-0.1116402500	-0.0543113600	-0.1164863500	-0.0479476400	-0.1211631000	-0.0414579450	-0.1244614000	-0.0339396550	-0.1281599000	-0.0273565150	-0.1305912000	-0.0201201350	-0.1310909000	-0.0119582550	-0.1312481000	-0.0037098545	-0.1303382000	0.0042373370	-0.1293840500	0.0122708300	-0.1267405000	0.0200344700
0.0015349560	-0.0952968400	-0.0112386900	-0.0950450900	-0.0244365800	-0.0945382150	-0.0356774250	-0.0949871650	-0.0453339550	-0.0956468950	-0.0528199300	-0.0951212650	-0.0597103050	-0.0943318000	-0.0663939450	-0.0933180750	-0.0724040000	-0.0903367600	-0.0778221400	-0.0857020250	-0.0835088250	-0.0804165000	-0.0893079800	-0.0749571500	-0.0934531500	-0.0676379900	-0.0986765950	-0.0601900900	-0.1034343000	-0.0525878000	-0.1086971500	-0.0449802150	-0.1132850500	-0.0372388700	-0.1158904500	-0.0291905150	-0.1158968000	-0.0212935300	-0.1157527500	-0.0128711650	-0.1161482000	-0.0038250335	-0.1179985000	0.0051322400	-0.1192438500	0.0136752750	-0.1192151000	0.0215112100	-0.1168324000	0.0293390200
0.0017132350	-0.1063651500	-0.0075282785	-0.1068809000	-0.0167896050	-0.1037925000	-0.0255126100	-0.1013491650	-0.0336968250	-0.0982484600	-0.0408728950	-0.0944579050	-0.0481697200	-0.0905620400	-0.0558218400	-0.0863088200	-0.0635624000	-0.0816786050	-0.0713585400	-0.0769652800	-0.0792494850	-0.0717006550	-0.0870727450	-0.0667516500	-0.0944594450	-0.0613809100	-0.1019811000	-0.0558770150	-0.1088223500	-0.0501959150	-0.1140483500	-0.0429538350	-0.1190557500	-0.0361103100	-0.1225631000	-0.0286324600	-0.1248378000	-0.0215464050	-0.1257293500	-0.0139811900	-0.1253582500	-0.0064214550	-0.1231918500	0.0013182480	-0.1207921500	0.0089144475	-0.1170422500	0.0166732650	-0.1126420500	0.0243467650
0.0015182485	-0.0942597300	-0.0091358105	-0.0942497500	-0.0201804650	-0.0935936000	-0.0298490850	-0.0920609350	-0.0387987150	-0.0904911950	-0.0461168400	-0.0873861400	-0.0536143350	-0.0845853000	-0.0615124250	-0.0816840100	-0.0691716550	-0.0778905100	-0.0769577000	-0.0741179400	-0.0845603200	-0.0694953550	-0.0922968000	-0.0654717400	-0.0998070150	-0.0612530600	-0.1071463000	-0.0562932150	-0.1136790000	-0.0514867450	-0.1187908500	-0.0452234250	-0.1237172500	-0.0389480300	-0.1270645000	-0.0316010000	-0.1291249000	-0.0243711000	-0.1307566000	-0.0167226250	-0.1303523000	-0.0085085960	-0.1293794500	-0.0001503015	-0.1269563500	0.0079366870	-0.1245857500	0.0163533250	-0.1204567000	0.0242912400
0.0012606790	-0.0782688200	-0.0091650865	-0.0798761200	-0.0200064850	-0.0818300300	-0.0292176200	-0.0826298700	-0.0373443100	-0.0827493200	-0.0440885450	-0.0812151400	-0.0513613800	-0.0799206700	-0.0590322300	-0.0786225900	-0.0664938200	-0.0767542750	-0.0727018250	-0.0734048950	-0.0788968000	-0.0687287250	-0.0858373150	-0.0652288350	-0.0929627700	-0.0618704900	-0.1006431750	-0.0581776300	-0.1080336500	-0.0544494200	-0.1144081500	-0.0494899900	-0.1199998000	-0.0439362050	-0.1236512000	-0.0368173050	-0.1270796500	-0.0300935000	-0.1301878000	-0.0227796000	-0.1314391000	-0.0144730500	-0.1315256500	-0.0059496160	-0.1306916500	0.0024352545	-0.1290490500	0.0109140100	-0.1261388500	0.0194330100
0.0014987385	-0.0930488400	-0.0111115950	-0.0926851000	-0.0239732800	-0.0925258350	-0.0349231800	-0.0926351000	-0.0444166650	-0.0918886900	-0.0519490700	-0.0893440500	-0.0583144650	-0.0850476050	-0.0645865100	-0.0807902300	-0.0713746600	-0.0788520400	-0.0777293750	-0.0767200750	-0.0841254500	-0.0731144050	-0.0899757450	-0.0685723800	-0.0951598750	-0.0635444900	-0.0995360700	-0.0566046300	-0.1037803000	-0.0493661250	-0.1088663000	-0.0412875150	-0.1140787000	-0.0330758750	-0.1196693500	-0.0249642900	-0.1252375500	-0.0180929950	-0.1293084500	-0.0104944930	-0.1310130500	-0.0021260730	-0.1308744500	0.0058771785	-0.1293305500	0.0132563050	-0.1261007000	0.0201078500	-0.1207633000	0.0257683600
0.0019715240	-0.1224017000	-0.0069061240	-0.1233491500	-0.0159429250	-0.1244004000	-0.0232742500	-0.1253218000	-0.0303981950	-0.1237234500	-0.0356768250	-0.1207250000	-0.0390726900	-0.1144380500	-0.0426299900	-0.1075441500	-0.0465422800	-0.1004928000	-0.0501979500	-0.0927412250	-0.0540952850	-0.0845193800	-0.0593317650	-0.0770606750	-0.0636949000	-0.0691367350	-0.0678659150	-0.0605538050	-0.0707503250	-0.0529016550	-0.0739879600	-0.0445286600	-0.0788084750	-0.0360694250	-0.0843691550	-0.0270825700	-0.0884525000	-0.0182447500	-0.0912117800	-0.0086439830	-0.0951933700	0.0010677586	-0.0986807100	0.0104545710	-0.1000970700	0.0199935850	-0.1012271000	0.0290574050	-0.1023271500	0.0373844100
0.0016037220	-0.0995669300	-0.0088632445	-0.1007697550	-0.0197571000	-0.1028882500	-0.0293413500	-0.1041873500	-0.0379554450	-0.1032463500	-0.0451817000	-0.1011416000	-0.0519100500	-0.0990768450	-0.0581688700	-0.0956430950	-0.0648112650	-0.0922084500	-0.0708810850	-0.0877179750	-0.0766308250	-0.0823951650	-0.0823176000	-0.0769368300	-0.0880494950	-0.0712195850	-0.0929490450	-0.0643626350	-0.0966749600	-0.0570380650	-0.1009675400	-0.0493394550	-0.1034649000	-0.0407922450	-0.1067251000	-0.0325572450	-0.1094684000	-0.0245897900	-0.1125227500	-0.0159137500	-0.1136240000	-0.0062678290	-0.1149476500	0.0033704170	-0.1151790500	0.0127988800	-0.1139020500	0.0221569400	-0.1120396000	0.0315797950
0.0021704480	-0.1347519500	-0.0044506555	-0.1342069000	-0.0110462350	-0.1325016500	-0.0170298250	-0.1309870500	-0.0223288950	-0.1277973000	-0.0263169000	-0.1225573000	-0.0308060450	-0.1165037000	-0.0342322950	-0.1094873000	-0.0388569900	-0.1028930000	-0.0421160050	-0.0951274200	-0.0455468800	-0.0871071400	-0.0487066900	-0.0792729800	-0.0537803800	-0.0720882150	-0.0599774950	-0.0644582300	-0.0657379300	-0.0569688950	-0.0710942200	-0.0483720300	-0.0748113850	-0.0386143050	-0.0790147200	-0.0284390550	-0.0822817450	-0.0184577450	-0.0859099200	-0.0081018070	-0.0892141950	0.0023160070	-0.0915734050	0.0127818900	-0.0931134100	0.0225264850	-0.0937547500	0.0320516900	-0.0944822050	0.0413600650
0.0019169030	-0.1190107500	-0.0067508760	-0.1178644500	-0.0157635100	-0.1157092000	-0.0233204750	-0.1141151000	-0.0304895950	-0.1124102500	-0.0367661600	-0.1089603500	-0.0425789000	-0.1051405000	-0.0483804100	-0.1004679500	-0.0539851600	-0.0951694700	-0.0592013100	-0.0891091150	-0.0652614900	-0.0830071200	-0.0714123700	-0.0766871200	-0.0770170550	-0.0692382200	-0.0834649800	-0.0614063750	-0.0900099700	-0.0537832400	-0.0960186300	-0.0451621050	-0.1008889700	-0.0356458000	-0.1053175000	-0.0258245250	-0.1097764000	-0.0171446200	-0.1133997500	-0.0079041220	-0.1149813500	0.0019403833	-0.1159334000	0.0113497095	-0.1170304500	0.0200872000	-0.1163960500	0.0284831500	-0.1133846000	0.0363290300
0.0017603420	-0.1092907500	-0.0067663560	-0.1098636500	-0.0152052050	-0.1110396500	-0.0222287300	-0.1119271500	-0.0284966400	-0.1093861500	-0.0345482400	-0.1055239500	-0.0408536750	-0.1006578850	-0.0477140300	-0.0955157200	-0.0533706700	-0.0888847400	-0.0586692500	-0.0811652200	-0.0643189400	-0.0736319200	-0.0709721400	-0.0667659150	-0.0776812500	-0.0596626750	-0.0851640950	-0.0531341700	-0.0930085700	-0.0489921750	-0.0986038550	-0.0433565350	-0.1039008500	-0.0380489300	-0.1089382000	-0.0307745600	-0.1140478000	-0.0243576600	-0.1171654000	-0.0166957300	-0.1190768500	-0.0080957145	-0.1203195000	0.0005838479	-0.1192866000	0.0090472235	-0.1172548500	0.0176869050	-0.1155334000	0.0268051550
0.0011557280	-0.0717536000	-0.0084163905	-0.0723349450	-0.0180666700	-0.0749338200	-0.0267865050	-0.0765918050	-0.0347681400	-0.0767755700	-0.0418793300	-0.0750242200	-0.0487220900	-0.0724422550	-0.0563492200	-0.0708900350	-0.0644036500	-0.0701788550	-0.0723824300	-0.0693253800	-0.0802413900	-0.0676992300	-0.0877925950	-0.0665943550	-0.0952889400	-0.0647086000	-0.1026826000	-0.0614203800	-0.1096298000	-0.0577050900	-0.1156190000	-0.0525849750	-0.1199550000	-0.0458946400	-0.1233122000	-0.0381999000	-0.1263890500	-0.0309026150	-0.1296443000	-0.0231466550	-0.1311422500	-0.0145944300	-0.1318944000	-0.0058888670	-0.1325166500	0.0026146275	-0.1313253500	0.0109336595	-0.1285453500	0.0191896950
0.0016909670	-0.1049839500	-0.0093910820	-0.1060684000	-0.0207004950	-0.1069616500	-0.0305629300	-0.1059550000	-0.0394648200	-0.1041404500	-0.0469222050	-0.1019930000	-0.0534265500	-0.0982646650	-0.0603077000	-0.0947161600	-0.0668993150	-0.0906349600	-0.0733900600	-0.0868301800	-0.0785828300	-0.0815721000	-0.0817970100	-0.0747512350	-0.0853357600	-0.0672795450	-0.0890586100	-0.0592341400	-0.0921430800	-0.0512826550	-0.0957919050	-0.0432308350	-0.0990868300	-0.0348851350	-0.1017324750	-0.0260042300	-0.1036009000	-0.0178044200	-0.1072169500	-0.0093781955	-0.1117150000	-0.0008458559	-0.1153556000	0.0077762005	-0.1179193500	0.0163584350	-0.1189190000	0.0249299150	-0.1182508000	0.0333783600
0.0013403530	-0.0832162000	-0.0106987950	-0.0833341400	-0.0230842250	-0.0835244550	-0.0336796850	-0.0834560950	-0.0428491050	-0.0824733050	-0.0508779250	-0.0824166350	-0.0580857750	-0.0792842700	-0.0656600950	-0.0756082600	-0.0732800850	-0.0717839350	-0.0810413650	-0.0682359900	-0.0888675250	-0.0643006200	-0.0965676700	-0.0605586100	-0.1039088000	-0.0564136800	-0.1115162000	-0.0524867400	-0.1182578000	-0.0489142450	-0.1230761000	-0.0438972750	-0.1264140000	-0.0380166500	-0.1276072000	-0.0311996950	-0.1280502000	-0.0247298600	-0.1290554000	-0.0182869650	-0.1283026000	-0.0110308170	-0.1271073000	-0.0037321155	-0.1251283500	0.0038629175	-0.1223983500	0.0116128600	-0.1212223500	0.0200640500
0.0017812775	-0.1105911500	-0.0110706200	-0.1099851500	-0.0240480000	-0.1077698500	-0.0352691250	-0.1068876000	-0.0449473150	-0.1053445500	-0.0527002550	-0.1038442000	-0.0594901350	-0.1024193000	-0.0651410300	-0.0991037750	-0.0694905850	-0.0942749750	-0.0741869750	-0.0897871250	-0.0773805700	-0.0842211200	-0.0781954500	-0.0772388100	-0.0797542450	-0.0701275450	-0.0826196800	-0.0630520750	-0.0861850850	-0.0557408500	-0.0904759200	-0.0476370600	-0.0953355100	-0.0395773900	-0.0990221800	-0.0298201700	-0.1017466700	-0.0201127900	-0.1041679500	-0.0098638500	-0.1070213500	0.0006149300	-0.1088378000	0.0112326350	-0.1112433000	0.0210180250	-0.1133146000	0.0301523500	-0.1129158000	0.0390364500
0.0014395790	-0.0893767450	-0.0095956270	-0.0914362250	-0.0210801200	-0.0948013550	-0.0305819650	-0.0987452500	-0.0392348400	-0.1004675150	-0.0462570150	-0.1000880500	-0.0522085850	-0.0964333050	-0.0585654950	-0.0924425900	-0.0645259450	-0.0877149700	-0.0704743150	-0.0822455450	-0.0771791050	-0.0768750150	-0.0832305550	-0.0708577950	-0.0897381550	-0.0645862550	-0.0965671700	-0.0573651700	-0.1031693000	-0.0502967900	-0.1088795500	-0.0420474600	-0.1146449500	-0.0339781350	-0.1196068000	-0.0256616650	-0.1237697500	-0.0184731550	-0.1256049000	-0.0108344100	-0.1263638000	-0.0028753465	-0.1236318500	0.0046482930	-0.1210655500	0.0126127300	-0.1179958000	0.0202485050	-0.1145950500	0.0278738900
0.0019674055	-0.1221473500	-0.0063662470	-0.1222783500	-0.0141873850	-0.1223187500	-0.0214343450	-0.1203094500	-0.0279778900	-0.1183235000	-0.0339688800	-0.1150533500	-0.0392798400	-0.1105883000	-0.0434289850	-0.1043261600	-0.0483099800	-0.0986604650	-0.0528440200	-0.0919704700	-0.0574980650	-0.0845792650	-0.0631968150	-0.0778047200	-0.0689868800	-0.0706799100	-0.0729638600	-0.0616919300	-0.0769299850	-0.0529631650	-0.0811236600	-0.0437829050	-0.0843889250	-0.0343021750	-0.0867284800	-0.0255199450	-0.0886520850	-0.0173345950	-0.0916915350	-0.0085514510	-0.0951689500	0.0001261705	-0.0967384150	0.0094413500	-0.0980568000	0.0186905150	-0.0990335950	0.0274491150	-0.0990909700	0.0361509800
0.0014317150	-0.0888887600	-0.0076201610	-0.0900263850	-0.0168138850	-0.0923060850	-0.0248324450	-0.0946440750	-0.0321542100	-0.0963668950	-0.0386477500	-0.0949855600	-0.0453715800	-0.0922814550	-0.0525079350	-0.0890240950	-0.0601246450	-0.0861541250	-0.0675775350	-0.0822805950	-0.0754812900	-0.0786764850	-0.0829449100	-0.0742689000	-0.0900719650	-0.0687048950	-0.0976289200	-0.0625877050	-0.1043010500	-0.0559142600	-0.1100503500	-0.0481293050	-0.1151823000	-0.0398374200	-0.1187322000	-0.0306012100	-0.1215864500	-0.0219568750	-0.1225092000	-0.0125670700	-0.1230918500	-0.0026793375	-0.1229050500	0.0069169925	-0.1245260000	0.0157419300	-0.1244588500	0.0239850650	-0.1228720500	0.0318516000
0.0013043195	-0.0809793200	-0.0096392680	-0.0816296900	-0.0206265250	-0.0812649900	-0.0302091200	-0.0816105050	-0.0386926000	-0.0807510250	-0.0456157100	-0.0778322950	-0.0525478500	-0.0755404050	-0.0599952800	-0.0740784900	-0.0679804600	-0.0745371150	-0.0760251500	-0.0733324250	-0.0843134200	-0.0723810550	-0.0921073550	-0.0699380050	-0.0996726750	-0.0660965450	-0.1075177000	-0.0616011200	-0.1138897500	-0.0556719900	-0.1197984000	-0.0485610650	-0.1252335500	-0.0410999850	-0.1294299500	-0.0328068300	-0.1318274000	-0.0246505100	-0.1332221000	-0.0158865650	-0.1331796000	-0.0066956220	-0.1318895000	0.0018098043	-0.1297457000	0.0103033065	-0.1268015000	0.0185496450	-0.1230721000	0.0265357050
0.0011638385	-0.0722576750	-0.0107005700	-0.0745236600	-0.0230280450	-0.0770261700	-0.0338775900	-0.0789426950	-0.0433616250	-0.0818215650	-0.0508794150	-0.0831038850	-0.0574004250	-0.0814800350	-0.0643463250	-0.0801049400	-0.0712186750	-0.0778603200	-0.0780110050	-0.0757590750	-0.0846093750	-0.0740545500	-0.0900089600	-0.0710782700	-0.0964724800	-0.0686069200	-0.1034529000	-0.0651219300	-0.1091922500	-0.0606881000	-0.1129039000	-0.0539007100	-0.1156253000	-0.0462468650	-0.1182245500	-0.0385892950	-0.1205101500	-0.0306656000	-0.1233908000	-0.0223043800	-0.1252665000	-0.0132537850	-0.1258249000	-0.0039651095	-0.1260900000	0.0050656070	-0.1247183000	0.0139345800	-0.1230817000	0.0224169150
0.0017994485	-0.1117198500	-0.0060330720	-0.1120851000	-0.0138041850	-0.1114499500	-0.0199587150	-0.1090746500	-0.0257348300	-0.1043721500	-0.0317010050	-0.0996125600	-0.0386636350	-0.0949812300	-0.0458565500	-0.0899555650	-0.0534937200	-0.0857654700	-0.0616039000	-0.0825661600	-0.0690810200	-0.0770831000	-0.0763773300	-0.0715366300	-0.0822605950	-0.0646061150	-0.0865479600	-0.0564269600	-0.0904376450	-0.0480768200	-0.0952489000	-0.0394515200	-0.1009903000	-0.0307988800	-0.1081156500	-0.0230530450	-0.1138556000	-0.0156127000	-0.1188901500	-0.0076150870	-0.1221396500	0.0013086126	-0.1240791500	0.0102246835	-0.1265498000	0.0182961550	-0.1265453500	0.0261176400	-0.1258506000	0.0339394800
0.0016962405	-0.1053123000	-0.0097309245	-0.1045284000	-0.0214816150	-0.1039229500	-0.0314985950	-0.1024297500	-0.0403294600	-0.1010016300	-0.0471116200	-0.0976955100	-0.0537925800	-0.0940519850	-0.0597991450	-0.0893106650	-0.0657059050	-0.0849293350	-0.0688043400	-0.0782335250	-0.0729783850	-0.0713361750	-0.0768598450	-0.0642711550	-0.0827895750	-0.0576665800	-0.0894564800	-0.0502330600	-0.0965982150	-0.0432349300	-0.1038093500	-0.0355505950	-0.1108484000	-0.0276982450	-0.1170611500	-0.0195086700	-0.1221311500	-0.0121364750	-0.1269028500	-0.0049699915	-0.1291178000	0.0030720315	-0.1308177500	0.0107786490	-0.1320757000	0.0179541850	-0.1305495500	0.0246458250	-0.1271919000	0.0311145450
0.0019142725	-0.1188491000	-0.0077054190	-0.1184346500	-0.0173428350	-0.1159220000	-0.0252090950	-0.1128843500	-0.0323451900	-0.1094883000	-0.0378790700	-0.1045885500	-0.0433606450	-0.0993097350	-0.0486925200	-0.0935169400	-0.0525589400	-0.0869074650	-0.0564887050	-0.0801893850	-0.0619743900	-0.0737473300	-0.0665735300	-0.0676135400	-0.0723561350	-0.0609607550	-0.0796256500	-0.0550587950	-0.0860127800	-0.0491895000	-0.0934811400	-0.0437816100	-0.1008812700	-0.0382682850	-0.1075999000	-0.0344599250	-0.1117344000	-0.0290448200	-0.1143340000	-0.0221132150	-0.1145500000	-0.0130037150	-0.1158215000	-0.0034815750	-0.1154826500	0.0059958670	-0.1129768000	0.0154496650	-0.1113705000	0.0252680800
0.0016211615	-0.1006511500	-0.0102150220	-0.1015915500	-0.0218962950	-0.1021459000	-0.0315174200	-0.1040606000	-0.0397218700	-0.1057828500	-0.0458333450	-0.1063736000	-0.0516524850	-0.1043190000	-0.0569979150	-0.1015431700	-0.0613901600	-0.0970569950	-0.0669642700	-0.0927128800	-0.0732779900	-0.0881296050	-0.0788752900	-0.0829909200	-0.0826314400	-0.0768864100	-0.0864443100	-0.0688950500	-0.0904107400	-0.0604121750	-0.0924630000	-0.0505639100	-0.0950802900	-0.0403047050	-0.0985987900	-0.0301356600	-0.0995443850	-0.0199125700	-0.1018915350	-0.0101347600	-0.1034356600	0.0006223453	-0.1051602550	0.0106145850	-0.1083670500	0.0196531200	-0.1092966000	0.0285367800	-0.1076502500	0.0373565050
0.0016280125	-0.1010766000	-0.0086864780	-0.1007594500	-0.0190836600	-0.1012071500	-0.0277445450	-0.1025429500	-0.0347020400	-0.1024240500	-0.0395837150	-0.0990331850	-0.0440022100	-0.0935205200	-0.0486522850	-0.0875850550	-0.0534885000	-0.0816984850	-0.0596255500	-0.0767168550	-0.0665975050	-0.0722294950	-0.0746822300	-0.0698960500	-0.0826896850	-0.0666179100	-0.0909121100	-0.0622288400	-0.0984093750	-0.0569559350	-0.1052054500	-0.0500738300	-0.1115082000	-0.0426247700	-0.1166815000	-0.0345030650	-0.1196443500	-0.0259730900	-0.1231355500	-0.0172660400	-0.1251285500	-0.0079062415	-0.1251544000	0.0015001384	-0.1257835000	0.0105110150	-0.1245111500	0.0193186800	-0.1215831000	0.0279188300
0.0012619055	-0.0783465050	-0.0102868850	-0.0794215550	-0.0218891550	-0.0818264950	-0.0314444500	-0.0853688200	-0.0400338450	-0.0873232200	-0.0470182350	-0.0872241300	-0.0535132300	-0.0850035550	-0.0597745450	-0.0809024800	-0.0666061800	-0.0770709000	-0.0733061450	-0.0724072300	-0.0802254400	-0.0674164700	-0.0879254250	-0.0639103000	-0.0957574150	-0.0603646700	-0.1038352000	-0.0564602150	-0.1106075500	-0.0513325850	-0.1167974000	-0.0454245400	-0.1216654500	-0.0383976850	-0.1267903500	-0.0317849850	-0.1299619000	-0.0250243350	-0.1317744500	-0.0173778450	-0.1331514500	-0.0091756860	-0.1329521000	-0.0009498728	-0.1320543000	0.0069478315	-0.1296621000	0.0147568950	-0.1269364500	0.0227835100
0.0015889090	-0.0986489000	-0.0087830880	-0.0990524400	-0.0191325350	-0.0996341800	-0.0279766500	-0.0982903850	-0.0354939800	-0.0971599550	-0.0405257300	-0.0936141750	-0.0438457200	-0.0878979650	-0.0482026100	-0.0827444000	-0.0547570950	-0.0793306200	-0.0618311650	-0.0753884100	-0.0691238700	-0.0706007650	-0.0764023000	-0.0657083550	-0.0833930250	-0.0603559700	-0.0916693800	-0.0559193550	-0.0991836650	-0.0510200700	-0.1063909000	-0.0453297000	-0.1131192000	-0.0395566200	-0.1181488000	-0.0323026900	-0.1218810500	-0.0251297750	-0.1241407500	-0.0169855800	-0.1248614500	-0.0078387900	-0.1255092000	0.0014867083	-0.1253628500	0.0104870900	-0.1257791500	0.0193995400	-0.1249187500	0.0282069800
0.0014621835	-0.0907811500	-0.0102940850	-0.0913317550	-0.0225512200	-0.0913203000	-0.0328901250	-0.0922767400	-0.0419973900	-0.0919858050	-0.0492304650	-0.0891015700	-0.0558808850	-0.0845990750	-0.0628150000	-0.0797459050	-0.0697845750	-0.0752139700	-0.0768060250	-0.0716753850	-0.0838591700	-0.0684871300	-0.0912538400	-0.0661249950	-0.0984053750	-0.0638039750	-0.1049158000	-0.0597547900	-0.1108631000	-0.0544986500	-0.1156188000	-0.0474521250	-0.1199828500	-0.0400028550	-0.1233887500	-0.0321259100	-0.1240979000	-0.0243446300	-0.1225349000	-0.0161778100	-0.1212829000	-0.0075004685	-0.1201723000	0.0008968482	-0.1196257500	0.0080510840	-0.1170904500	0.0150979200	-0.1150922000	0.0228918500
0.0010824130	-0.0672027800	-0.0115185650	-0.0684155350	-0.0241916300	-0.0717483400	-0.0349867600	-0.0751197900	-0.0444031050	-0.0781254500	-0.0521374150	-0.0786629650	-0.0592863900	-0.0774837750	-0.0664033200	-0.0752234600	-0.0736179300	-0.0731466450	-0.0808854800	-0.0719166750	-0.0881439450	-0.0711289550	-0.0944466450	-0.0682651450	-0.1003472500	-0.0646671400	-0.1066981500	-0.0605978750	-0.1125968500	-0.0561778800	-0.1179639000	-0.0509407900	-0.1218046500	-0.0442484700	-0.1255343000	-0.0372973050	-0.1279625000	-0.0304110600	-0.1298150000	-0.0229482550	-0.1309538000	-0.0150793950	-0.1297487000	-0.0072212015	-0.1276052000	0.0004165605	-0.1249464000	0.0082887130	-0.1224065500	0.0166829200
0.0018321625	-0.1137518500	-0.0074141745	-0.1134065500	-0.0165768450	-0.1110547000	-0.0251891450	-0.1109428500	-0.0328035500	-0.1101348000	-0.0391247000	-0.1075666500	-0.0448835250	-0.1038299450	-0.0516349000	-0.1008752700	-0.0582849150	-0.0976768700	-0.0637477000	-0.0926057650	-0.0693731700	-0.0868945650	-0.0759257200	-0.0829078300	-0.0810323400	-0.0768443700	-0.0856105200	-0.0695944600	-0.0886704300	-0.0614605200	-0.0920293400	-0.0526016050	-0.0956282150	-0.0435282900	-0.0977549700	-0.0342764400	-0.0970955800	-0.0249303150	-0.0978002550	-0.0154391050	-0.0980089300	-0.0055576555	-0.0991063550	0.0043124307	-0.0989797100	0.0144218650	-0.0993523000	0.0244940750	-0.0982890450	0.0347127950
0.0015000000	-0.0931291850	-0.0082682760	-0.0924628050	-0.0183147100	-0.0924198450	-0.0268832350	-0.0918083200	-0.0342044800	-0.0897468200	-0.0397580100	-0.0854897050	-0.0448860450	-0.0797594150	-0.0503750050	-0.0740945850	-0.0567164150	-0.0693273050	-0.0636790200	-0.0654155300	-0.0721335500	-0.0641347700	-0.0807573000	-0.0626061550	-0.0893793850	-0.0619371900	-0.0977929950	-0.0590358250	-0.1058857500	-0.0562321600	-0.1123543000	-0.0510410750	-0.1173421000	-0.0439577300	-0.1220666000	-0.0363105400	-0.1254775500	-0.0289002150	-0.1291973000	-0.0212112150	-0.1320425000	-0.0128172300	-0.1329739500	-0.0041323245	-0.1329399000	0.0043461595	-0.1315268500	0.0127395450	-0.1281325500	0.0208641600
0.0013682370	-0.0849486200	-0.0087013035	-0.0853800100	-0.0189652850	-0.0840621700	-0.0281718250	-0.0832536700	-0.0365894000	-0.0821620600	-0.0432400100	-0.0796453050	-0.0495655250	-0.0760308850	-0.0560485050	-0.0728201750	-0.0628626450	-0.0701652650	-0.0697948150	-0.0665900150	-0.0774553100	-0.0640816650	-0.0851154100	-0.0619195350	-0.0927917900	-0.0594647750	-0.1010376900	-0.0575461500	-0.1083798000	-0.0553160700	-0.1143396500	-0.0526864800	-0.1190797000	-0.0476077350	-0.1228269500	-0.0411864800	-0.1253014000	-0.0340122500	-0.1274078500	-0.0260495400	-0.1291500000	-0.0172629600	-0.1295371000	-0.0082447555	-0.1297229000	0.0005218875	-0.1280975000	0.0093069925	-0.1251666500	0.0180335900
0.0014846110	-0.0921738850	-0.0090292515	-0.0933372500	-0.0202178150	-0.0951322750	-0.0301655800	-0.0952596100	-0.0392024450	-0.0936291050	-0.0469036700	-0.0912564350	-0.0540369650	-0.0877498450	-0.0613760350	-0.0836826850	-0.0689305700	-0.0798506600	-0.0758713200	-0.0750172350	-0.0825646250	-0.0694235650	-0.0892252200	-0.0638752000	-0.0956456400	-0.0578325150	-0.1020572000	-0.0510679850	-0.1084080000	-0.0446875800	-0.1148609000	-0.0383478450	-0.1205139000	-0.0316972950	-0.1249126000	-0.0244401400	-0.1280807500	-0.0177028750	-0.1296605500	-0.0104211350	-0.1301725000	-0.0025506520	-0.1307003500	0.0049357215	-0.1291208000	0.0115349825	-0.1259090000	0.0182961450	-0.1222613500	0.0249544900
0.0012470360	-0.0774238250	-0.0084860590	-0.0789606550	-0.0188010200	-0.0807668850	-0.0278105700	-0.0816620050	-0.0358863600	-0.0807982050	-0.0425519200	-0.0785516000	-0.0485336700	-0.0750293500	-0.0555668250	-0.0736303700	-0.0631275850	-0.0739491400	-0.0707833050	-0.0746878850	-0.0786327400	-0.0741678850	-0.0862789550	-0.0731057500	-0.0933801650	-0.0703802300	-0.1001771250	-0.0660635100	-0.1062003000	-0.0605082750	-0.1117405000	-0.0537808800	-0.1170450500	-0.0467498350	-0.1221794000	-0.0393199050	-0.1259310000	-0.0319859550	-0.1283542500	-0.0238834250	-0.1292746500	-0.0148597700	-0.1293829000	-0.0057405025	-0.1287212000	0.0030729080	-0.1275280000	0.0120471600	-0.1249529500	0.0209379600
0.0021690355	-0.1346674000	-0.0029585680	-0.1346405500	-0.0080719445	-0.1319761500	-0.0135649400	-0.1295701000	-0.0188424750	-0.1265766000	-0.0234591250	-0.1225841000	-0.0276727400	-0.1174884000	-0.0315768250	-0.1117004000	-0.0364653100	-0.1059841000	-0.0414908100	-0.1001688650	-0.0461137650	-0.0932932700	-0.0510523150	-0.0864678450	-0.0541497950	-0.0781246250	-0.0576816300	-0.0688973250	-0.0613200750	-0.0597263700	-0.0632599300	-0.0492809800	-0.0657012550	-0.0384336850	-0.0696439450	-0.0276400750	-0.0721564500	-0.0170803900	-0.0739872450	-0.0058995990	-0.0759211000	0.0056284310	-0.0771593800	0.0167746650	-0.0788711050	0.0272098600	-0.0785797650	0.0371594250	-0.0791806300	0.0465633650
0.0018047020	-0.1120475000	-0.0104477775	-0.1122253500	-0.0226118050	-0.1126741500	-0.0325412450	-0.1118828000	-0.0409153750	-0.1125297500	-0.0469836950	-0.1106971500	-0.0516380950	-0.1055694500	-0.0569246800	-0.1004849350	-0.0621764550	-0.0946151350	-0.0666130150	-0.0885568850	-0.0683701800	-0.0806104900	-0.0711249600	-0.0730514350	-0.0741344500	-0.0656877650	-0.0800215750	-0.0588795950	-0.0852904350	-0.0515658400	-0.0904147900	-0.0429022950	-0.0966723750	-0.0348262900	-0.1034261000	-0.0272690100	-0.1076559000	-0.0191044900	-0.1126997500	-0.0113498025	-0.1163343000	-0.0029806285	-0.1180939000	0.0050347835	-0.1175015000	0.0131250500	-0.1147687500	0.0213357750	-0.1115322500	0.0299435050
0.0018492950	-0.1148160000	-0.0080273980	-0.1149116000	-0.0182436400	-0.1129164500	-0.0271074200	-0.1104352500	-0.0352513450	-0.1079656500	-0.0417447600	-0.1043771000	-0.0479414150	-0.1001484000	-0.0544983050	-0.0958185050	-0.0609709800	-0.0914463950	-0.0670080900	-0.0866638450	-0.0731734100	-0.0807349750	-0.0788031200	-0.0743553000	-0.0854042650	-0.0684677700	-0.0908576900	-0.0611071350	-0.0952819400	-0.0534063150	-0.0987518900	-0.0454051900	-0.1014665000	-0.0368088250	-0.1056977500	-0.0284714050	-0.1084693500	-0.0201844150	-0.1097107000	-0.0112172050	-0.1110029500	-0.0016580795	-0.1118608500	0.0077263195	-0.1116830000	0.0167001800	-0.1107603500	0.0255218700	-0.1087934500	0.0343320200
0.0012717735	-0.0789599150	-0.0107932950	-0.0791831700	-0.0228689200	-0.0788480650	-0.0328823150	-0.0785032550	-0.0416505200	-0.0800549500	-0.0488559150	-0.0819154500	-0.0556344400	-0.0825849700	-0.0627331750	-0.0818522650	-0.0696713200	-0.0823366300	-0.0757875350	-0.0804857600	-0.0821571750	-0.0782009450	-0.0876518650	-0.0742582000	-0.0929578850	-0.0690164250	-0.0986301100	-0.0630333850	-0.1045982500	-0.0574649000	-0.1097594000	-0.0505579650	-0.1146129000	-0.0434077400	-0.1189394500	-0.0356915400	-0.1219576000	-0.0284478550	-0.1242343500	-0.0203872700	-0.1242772000	-0.0117352000	-0.1238620000	-0.0027149630	-0.1242289500	0.0060756965	-0.1236896000	0.0148896200	-0.1227068500	0.0238259000
0.0014092560	-0.0874958250	-0.0090358910	-0.0875901450	-0.0196808700	-0.0896964050	-0.0290517450	-0.0907018050	-0.0377288550	-0.0903918950	-0.0453482950	-0.0890894100	-0.0523627400	-0.0857530450	-0.0598414950	-0.0827928500	-0.0675014750	-0.0807939300	-0.0750255050	-0.0786886350	-0.0824198700	-0.0757831650	-0.0892056450	-0.0724434600	-0.0958920700	-0.0690598200	-0.1025373500	-0.0651819550	-0.1083601000	-0.0604592400	-0.1129969500	-0.0537907300	-0.1161513000	-0.0457962950	-0.1199269500	-0.0376424600	-0.1220820500	-0.0293924650	-0.1242128000	-0.0207073850	-0.1249903500	-0.0113985750	-0.1241193500	-0.0020297685	-0.1231323000	0.0070294655	-0.1200537000	0.0158417900	-0.1169849500	0.0248648200
0.0015147050	-0.0940428150	-0.0096970990	-0.0938736150	-0.0213340050	-0.0944972100	-0.0315110350	-0.0950335850	-0.0407873350	-0.0949540550	-0.0484873050	-0.0934874250	-0.0557420750	-0.0915736850	-0.0633169200	-0.0902802000	-0.0706430450	-0.0882034200	-0.0775299250	-0.0852480800	-0.0843120500	-0.0820894650	-0.0900523000	-0.0776604100	-0.0955467450	-0.0729126150	-0.1012475200	-0.0677736500	-0.1053538000	-0.0614406700	-0.1097338500	-0.0546920900	-0.1125433000	-0.0471501800	-0.1138089500	-0.0390775500	-0.1131874500	-0.0309099400	-0.1120673500	-0.0220852100	-0.1111947000	-0.0124749600	-0.1099928000	-0.0026143460	-0.1093565000	0.0071731260	-0.1085042500	0.0170170800	-0.1069711500	0.0268665800
0.0019056345	-0.1183144000	-0.0074060950	-0.1182915500	-0.0169452650	-0.1188171000	-0.0252333550	-0.1182748000	-0.0327133700	-0.1178306500	-0.0387106200	-0.1157092000	-0.0437132950	-0.1116363500	-0.0495421900	-0.1081527500	-0.0548871450	-0.1039750500	-0.0588975200	-0.0983621950	-0.0637751850	-0.0929753700	-0.0686988500	-0.0875072000	-0.0727607950	-0.0809436250	-0.0763636400	-0.0732116100	-0.0787068950	-0.0648503500	-0.0810003050	-0.0552218200	-0.0831503600	-0.0451938700	-0.0853066450	-0.0347661200	-0.0860059750	-0.0246746900	-0.0882770850	-0.0144295700	-0.0899221700	-0.0036171540	-0.0902079550	0.0072174505	-0.0898869800	0.0176898700	-0.0890353600	0.0279587200	-0.0881526550	0.0380609900
0.0018117680	-0.1124865000	-0.0068243410	-0.1110484000	-0.0157921350	-0.1091498500	-0.0235055500	-0.1075703500	-0.0299062200	-0.1040245500	-0.0355632200	-0.0998631200	-0.0409289450	-0.0944658100	-0.0467612500	-0.0898396850	-0.0529827250	-0.0845055300	-0.0599932100	-0.0795935500	-0.0683257250	-0.0755207750	-0.0766435900	-0.0711664300	-0.0847751550	-0.0661887350	-0.0926826150	-0.0602909200	-0.1002954950	-0.0551980800	-0.1065609500	-0.0483600250	-0.1118836000	-0.0405196200	-0.1160883500	-0.0321396700	-0.1196961500	-0.0246115800	-0.1217626000	-0.0172150700	-0.1215708000	-0.0084047720	-0.1203247000	0.0008037096	-0.1195608000	0.0095027085	-0.1158563000	0.0178111700	-0.1116877500	0.0263553550
0.0012076975	-0.0749818550	-0.0076893030	-0.0771899450	-0.0172952750	-0.0802162550	-0.0255276250	-0.0829544950	-0.0327819100	-0.0844037250	-0.0391003600	-0.0843090200	-0.0455116600	-0.0823177750	-0.0527885400	-0.0800866250	-0.0605322950	-0.0775325400	-0.0683731250	-0.0745041400	-0.0764031400	-0.0712236850	-0.0842002000	-0.0679907750	-0.0917446600	-0.0636076400	-0.0996354000	-0.0588249750	-0.1074916000	-0.0551697500	-0.1139750500	-0.0498703400	-0.1193983000	-0.0436492050	-0.1234445000	-0.0362551400	-0.1252872500	-0.0284299850	-0.1269767000	-0.0200208750	-0.1277602000	-0.0108108850	-0.1296006500	-0.0018277640	-0.1301645000	0.0069149740	-0.1299632000	0.0155366100	-0.1296801000	0.0241053050
0.0018170690	-0.1128156500	-0.0081538900	-0.1130602000	-0.0184106950	-0.1128274500	-0.0270790350	-0.1133134000	-0.0349011750	-0.1109696500	-0.0415548000	-0.1076965500	-0.0469930450	-0.1023530000	-0.0521521150	-0.0960662650	-0.0574149600	-0.0897137400	-0.0626241650	-0.0829572600	-0.0687722850	-0.0768007500	-0.0740308900	-0.0704889000	-0.0800249300	-0.0645070900	-0.0862136300	-0.0580673050	-0.0923947500	-0.0512891800	-0.0973112350	-0.0430843700	-0.1032801000	-0.0358185950	-0.1088685000	-0.0286267900	-0.1124273000	-0.0212921300	-0.1132428000	-0.0130128660	-0.1138565000	-0.0040765748	-0.1141812500	0.0050462740	-0.1138810000	0.0140503850	-0.1131042000	0.0231028150	-0.1116713000	0.0319814950
0.0016323080	-0.1013446000	-0.0084356050	-0.1016476500	-0.0186935400	-0.1022055500	-0.0273769850	-0.1016708500	-0.0353340900	-0.0995163550	-0.0422649200	-0.0967291350	-0.0485659050	-0.0925565850	-0.0545227850	-0.0874828200	-0.0611071850	-0.0828363900	-0.0679192750	-0.0784424450	-0.0746489350	-0.0737247750	-0.0813508350	-0.0694175350	-0.0881018250	-0.0659645750	-0.0952143950	-0.0616654650	-0.1008161000	-0.0556186800	-0.1062501500	-0.0485472800	-0.1120470000	-0.0417187200	-0.1170504500	-0.0343999800	-0.1195727500	-0.0266152700	-0.1210795500	-0.0178279250	-0.1210545000	-0.0081549835	-0.1208257000	0.0015598298	-0.1199507000	0.0110864585	-0.1188381500	0.0206270850	-0.1174174500	0.0299852600
0.0014759665	-0.0916378450	-0.0098426645	-0.0919095050	-0.0210873550	-0.0934387850	-0.0306380350	-0.0942004750	-0.0391995500	-0.0932627500	-0.0460552250	-0.0914743950	-0.0514903650	-0.0868069300	-0.0572012800	-0.0817029600	-0.0630714250	-0.0763857500	-0.0690373900	-0.0710687700	-0.0763767350	-0.0671062950	-0.0835092550	-0.0634400850	-0.0907296700	-0.0595879450	-0.0977994100	-0.0543223950	-0.1050982500	-0.0505921050	-0.1108830000	-0.0451677550	-0.1154416500	-0.0382692050	-0.1194230500	-0.0306651500	-0.1225067000	-0.0232069050	-0.1259693000	-0.0158887600	-0.1287002000	-0.0082835475	-0.1304231500	-0.0004745375	-0.1299143500	0.0073753780	-0.1290513500	0.0153616400	-0.1273105000	0.0233986050
0.0012431205	-0.0771814550	-0.0098227775	-0.0773465250	-0.0207508750	-0.0759553750	-0.0298596100	-0.0735519450	-0.0380575950	-0.0727002500	-0.0457338200	-0.0723182950	-0.0534249700	-0.0720353050	-0.0616745300	-0.0716715350	-0.0700381750	-0.0702931750	-0.0783338200	-0.0682960700	-0.0867322050	-0.0666140850	-0.0948640200	-0.0643001750	-0.1028038000	-0.0613181700	-0.1107217500	-0.0590622350	-0.1171230500	-0.0545455450	-0.1229198000	-0.0483224100	-0.1283781500	-0.0417267750	-0.1320029000	-0.0339065600	-0.1350127000	-0.0265749150	-0.1368401500	-0.0187384650	-0.1367560500	-0.0106561940	-0.1351192000	-0.0027768115	-0.1321392500	0.0043650041	-0.1287792000	0.0112559115	-0.1245898000	0.0182780200
[truncated: 110 more columns]
