# Supplementary material for: Halimeda tuna (Bryopsidales, Ulvophyceae) calcification on the depth transect in the northern Adriatic Sea; carbonate production on the microscale of individual segments
Source: PeerJ. 2023 Mar 16;11:e15061. doi: 10.7717/peerj.15061 (PMC10024899; doi:10.7717/peerj.15061)
Supplement: Supplemental Information 2 [file peerj-11-15061-s002.xls]

## Sheet: proS2
Table S2. External characteristics of H. tuna segments and associated abiotic factors.
segment assignment	position on thalli	depth (meters)	irradiation	% of surface irradiation	dry weight (grams)	decalcified dry weight (grams)	%CaCO3	centroid size	shape asymmetry (Procrustes distance)	surface area (mm_sq)
A1_1	A	6.2	16.3	29.9	1.954	0.75	0.616171954964176	424.684495814395	0.134278983175147	9.21443509313013
A1_2	B	6.2	16.3	29.9	2.018	0.779	0.613974231912785	463.748261953049	0.0566484215582259	10.98754059423
A1_3	C	6.2	16.3	29.9	4.222	1.39	0.670772145902416	729.566156187706	0.0896838891619068	27.1935095988426
A1_4	C	6.2	16.3	29.9	4.176	1.396	0.665708812260536	789.149934728073	0.125558935254369	31.8166867793007
A1_5	D	6.2	16.3	29.9	3.795	1.476	0.611067193675889	810.60303164833	0.0821999669882792	33.5700779755332
A2_1	A	6.2	16.3	29.9	3.398	1.998	0.412007062978223	456.11701703516	0.143219021866597	10.6289032406723
A2_2	C	6.2	16.3	29.9	5.816	2.922	0.497592847317744	608.406615614432	0.113003469335912	18.9114033809869
A2_3	C	6.2	16.3	29.9	6.068	2.726	0.550758075148319	801.26775494869	0.228190265331729	32.8013134725071
A2_4	D	6.2	16.3	29.9	3.884	2.065	0.468331616889804	917.724966747777	0.082808709120113	43.0289745645159
A3_1	A	6.2	16.3	29.9	2.971	1.782	0.400201952204645	317.742051860132	0.0542666535518631	5.15804698857145
A3_2	B	6.2	16.3	29.9	8.17	5.17	0.367197062423501	545.958206645759	0.124444241713856	15.2284148663029
A3_3	C	6.2	16.3	29.9	15.185	6.174	0.593414553836022	896.363209166561	0.0542552704193529	41.0491291703634
A3_4	C	6.2	16.3	29.9	22.263	4.517	0.797107308089655	1117.22780567615	0.0601065640359831	63.770434275853
A3_5	D	6.2	16.3	29.9	17.009	2.951	0.826503615732847	956.078858959278	0.100466889812854	46.700693822602
A4_1	A	6.2	16.3	29.9	9.55	4.251	0.554869109947644	716.746796073306	0.0711488908600375	26.2462597910201
A4_2	C	6.2	16.3	29.9	15.56	3.799	0.755848329048843	1027.97113872247	0.0468538549307609	53.9880629839491
A4_3	D	6.2	16.3	29.9	23.964	3.911	0.836796861959606	1015.41961910927	0.050220273393596	52.6777240767312
A5_1	A	6.2	16.3	29.9	11.192	5.422	0.51554681915654	548.458001307515	0.294055800278053	15.3681876952378
A5_2	B	6.2	16.3	29.9	3.155	1.154	0.634231378763867	555.923087028217	0.565687834700874	15.7893889563223
A5_3	C	6.2	16.3	29.9	1.234	0.322	0.739059967585089	326.596281210817	0.116968820078746	5.44952153771855
A5_4	C	6.2	16.3	29.9	0.802	0.218	0.728179551122194	266.453103620589	0.0911006887792078	3.62724983095988
A5_5	C	6.2	16.3	29.9	5.898	1.377	0.766531027466938	794.47485167946	0.0571788649201946	32.2475119136017
A5_6	C	6.2	16.3	29.9	10.625	1.63	0.846588235294118	991.832816319717	0.0699878208397669	50.2588850221614
A5_7	C	6.2	16.3	29.9	8.387	1.528	0.817813282460951	859.08125820422	0.0920959360308132	37.7054728728228
A5_8	C	6.2	16.3	29.9	4.068	0.837	0.794247787610619	727.449473326025	0.125459884926782	27.0359459946197
A5_9	C	6.2	16.3	29.9	4.929	1.056	0.785757760194766	849.142943936249	0.112044767006597	36.838124637604
A5_10	D	6.2	16.3	29.9	1.32	0.339	0.743181818181818	476.016735723749	0.125629970536322	11.5765818410858
A6_1	A	6.2	16.3	29.9	3.685	1.868	0.493080054274084	364.673917132699	0.0951851240108665	6.79430919360756
A6_2	B	6.2	16.3	29.9	7.611	3.026	0.602417553540928	599.220573243743	0.110514599910334	18.3446459419124
A6_3	C	6.2	16.3	29.9	16.85	4.845	0.712462908011869	952.433343130452	0.0469069701919975	46.3452345630187
A6_4	C	6.2	16.3	29.9	5.881	2.025	0.655670804284986	624.814329011057	0.107567403980544	19.9451755977308
A6_5	C	6.2	16.3	29.9	15.693	3.668	0.766265213789588	985.43227267377	0.0562010024497802	49.612311874139
A6_6	C	6.2	16.3	29.9	23.707	4.992	0.789429282490404	1338.9927461011	0.0575368254928842	91.5993414213496
A6_7	D	6.2	16.3	29.9	24.758	4.086	0.834962436384199	1201.14777006367	0.129192470848068	73.7104022788729
A7_1	A	6.2	16.3	29.9	7.194	3.167	0.559772032249096	646.224609747437	0.106058387185378	21.3355031205665
A7_2	C	6.2	16.3	29.9	19.393	6.747	0.652090960655907	1307.64648629229	0.121292250163799	87.3608005287213
A7_3	D	6.2	16.3	29.9	13.442	5.213	0.612185686653772	1172.48754264804	0.111256196054227	70.2348043542967
A8_1	A	6.2	16.3	29.9	18.277	15.94	0.127865623461181	620.849948578938	0.302653305901519	19.6928785104525
A8_2	B	6.2	16.3	29.9	12.244	5.408	0.558314276380268	627.260984527519	0.0961625809986384	20.101684549076
A8_3	C	6.2	16.3	29.9	3.7	2.132	0.423783783783784	386.415053800079	0.182966967863043	7.62858477741152
A8_4	C	6.2	16.3	29.9	19.74	6.576	0.666869300911854	965.790212180604	0.0752933707210548	47.6542349971916
A8_5	C	6.2	16.3	29.9	23.464	4.566	0.805404023184453	1146.66610399422	0.0582598092103229	67.1753367403779
A8_6	D	6.2	16.3	29.9	9.527	2.364	0.751863125852839	762.89295308146	0.0635375096004684	29.7346690601364
A9_1	A	6.2	16.3	29.9	1.534	0.56	0.634941329856584	232.318907290089	0.171640048829599	2.75743329562911
A9_2	B	6.2	16.3	29.9	1.883	0.459	0.756240042485396	308.163633725606	0.185170572913646	4.85175291696303
A9_3	C	6.2	16.3	29.9	2.238	0.505	0.774352100089365	349.381060317672	0.19057907008865	6.23640943202152
A9_4	C	6.2	16.3	29.9	5.857	0.736	0.874338398497524	595.433178511091	0.115856015113365	18.1134828339693
A9_5	D	6.2	16.3	29.9	7.282	0.923	0.87324910738808	716.250571482293	0.0522448127477042	26.2099302778877
A10_1	A	6.2	16.3	29.9	5.19	2.386	0.540269749518304	643.136854105229	0.238765974138561	21.1321019197067
A10_2	B	6.2	16.3	29.9	4.595	1.265	0.724700761697497	577.399593253509	0.139675264797485	17.0329099308812
A10_3	C	6.2	16.3	29.9	18.375	3.146	0.828789115646259	1144.92015237935	0.075801972735347	66.9709257155212
A10_4	C	6.2	16.3	29.9	16.529	2.536	0.846572690422893	1089.9676995335	0.0753666788442499	60.6964315500862
A10_5	D	6.2	16.3	29.9	7.655	1.374	0.82050947093403	794.9023253422	0.228478725476027	32.2822233221714
B1_1	A	4.0	31.0	27.0	1.586	0.712	0.551071878940731	352.139225489292	0.129789164211829	6.33526392360966
B1_2	B	4.0	31.0	27.0	1.532	0.654	0.573107049608355	380.959416259241	0.210557742092499	7.41469562558096
B1_3	C	4.0	31.0	27.0	4.151	1.574	0.620814261623705	716.307186680112	0.129037373418356	26.2140739088805
B1_4	C	4.0	31.0	27.0	7.963	2.69	0.662187617732011	1010.16986107506	0.0795367187365033	52.1344404427849
B1_5	C	4.0	31.0	27.0	9.782	2.889	0.7046616233899	1146.54567560975	0.0777522935643259	67.1612273279937
B1_6	D	4.0	31.0	27.0	4.808	1.545	0.678660565723794	863.808809776026	0.143542301588116	38.1216035615666
B2_1	A	4.0	31.0	27.0	2.002	1.074	0.463536463536464	371.634006466669	0.162137421467946	7.0561336380145
B2_2	B	4.0	31.0	27.0	4.332	2.348	0.457987072945522	394.366985573185	0.0602884894163655	7.94578856355202
B2_3	C	4.0	31.0	27.0	4.91	2.267	0.538289205702648	329.273588398934	0.210148201286249	5.53923379551418
B2_4	C	4.0	31.0	27.0	9.41	3.821	0.59394261424017	700.768512367477	0.063611173243653	25.0890987899254
B2_5	C	4.0	31.0	27.0	13.156	4.587	0.65133779264214	922.367841674445	0.121126256270536	43.4654528222958
B2_6	C	4.0	31.0	27.0	17.678	4.711	0.733510578119697	1055.92327317808	0.0859462663710539	56.9640195570902
B2_7	C	4.0	31.0	27.0	2.836	1.023	0.639280677009873	429.22479027806	0.15780684108989	9.41251100290451
B2_8	C	4.0	31.0	27.0	7.323	2.747	0.624880513450772	862.797479277175	0.142938758802931	38.0323917567216
B2_9	C	4.0	31.0	27.0	7.57	2.365	0.687582562747688	903.235799004053	0.0761781785764366	41.6810054805012
B2_10	D	4.0	31.0	27.0	4.426	1.501	0.66086760054225	695.858248838912	0.108575431619408	24.738733509558
B3_1	A	4.0	31.0	27.0	0.83	0.432	0.479518072289157	216.71475366732	0.212588373308736	2.39945638291258
B3_2	B	4.0	31.0	27.0	7.376	3.771	0.488747288503254	575.261137400258	0.0575679835901845	16.9069774702132
B3_3	C	4.0	31.0	27.0	11.294	5.119	0.546750486984239	779.72072463167	0.0961963779503692	31.0609016261848
B3_4	C	4.0	31.0	27.0	10.158	4.003	0.605926363457373	854.592113014766	0.0702124207950033	37.3124411521456
B3_5	C	4.0	31.0	27.0	11.236	5.128	0.543609825560698	1016.05264948436	0.0749412278455673	52.7434249815208
B3_6	C	4.0	31.0	27.0	5.724	2.748	0.519916142557652	871.972238109286	0.0811860696988169	38.8455449882622
B3_7	D	4.0	31.0	27.0	5.889	2.817	0.521650534895568	920.261670008615	0.0506883489809921	43.2671779443551
B4_1	A	4.0	31.0	27.0	10.284	4.629	0.549883313885648	600.578309064041	0.0289744710768524	18.427872058708
B4_2	B	4.0	31.0	27.0	17.417	6.423	0.631222368949877	913.072693923235	0.0627306434037347	42.5938221207949
B4_3	C	4.0	31.0	27.0	3.576	1.457	0.592561521252796	505.486681262576	0.17249246084052	13.0543525422706
B4_4	C	4.0	31.0	27.0	9.464	3.149	0.667265426880812	898.732860981762	0.0947106983493496	41.2664533938184
B4_5	C	4.0	31.0	27.0	9.181	2.951	0.678575318592746	947.614096950851	0.0963871101490558	45.8774138366454
B4_6	C	4.0	31.0	27.0	7.931	3.148	0.60307653511537	1081.27031809923	0.0826892080484643	59.7316436359951
B4_7	D	4.0	31.0	27.0	5.147	2.239	0.56498931416359	881.912123503515	0.0843515895956703	39.7362178821289
B5_1	A	4.0	31.0	27.0	3.364	1.912	0.431629013079667	435.124321768243	0.141879834319943	9.67303193089343
B5_2	C	4.0	31.0	27.0	8.225	3.875	0.52887537993921	789.617937769865	0.0868402253241925	31.854435553933
B5_3	C	4.0	31.0	27.0	14.055	5.297	0.623123443614372	1098.29590546057	0.0717944926960257	61.6275115441598
B5_4	D	4.0	31.0	27.0	8.384	3.551	0.576455152671756	1019.44734984499	0.0793700534378958	53.0964524153242
B6_1	A	4.0	31.0	27.0	8.868	2.389	0.730604420387912	753.296446661621	0.135981950828236	28.991303362494
B6_2	B	4.0	31.0	27.0	4.249	1.637	0.614732878324312	523.491441852544	0.123776666702197	14.000871670408
B6_3	C	4.0	31.0	27.0	4.334	1.36	0.686202122750346	593.784799467844	0.0855962824963667	18.0133320269596
B6_4	C	4.0	31.0	27.0	3.034	1.188	0.608437705998682	623.717311828027	0.0985057214914662	19.8751996344297
B6_5	C	4.0	31.0	27.0	2.878	1.129	0.607713690062544	644.758267764578	0.0664444496958261	21.2387886065363
B6_6	C	4.0	31.0	27.0	4.497	1.525	0.660885034467423	784.06338753024	0.0973927872114897	31.407853164545
B6_7	C	4.0	31.0	27.0	5.846	2.197	0.624187478617858	951.987613132832	0.112161347737079	46.3018664308759
B6_8	D	4.0	31.0	27.0	3.701	1.63	0.559578492299378	666.851848501597	0.0868827893212478	22.7192830052563
B7_1	A	4.0	31.0	27.0	12.382	6.003	0.515183330641253	833.417804511803	0.15270745221325	35.4863597520599
B7_2	C	4.0	31.0	27.0	3.468	1.889	0.455305651672434	546.052439831326	0.163948954955539	15.2336722133671
B7_3	C	4.0	31.0	27.0	10.033	4.647	0.536828466061995	1080.47977770139	0.0606296029375983	59.6443333406059
B7_4	D	4.0	31.0	27.0	10.046	4.435	0.55853075851085	1168.99786469926	0.0802433484187046	69.8173464319333
B8_1	A	4.0	31.0	27.0	2.77	1.552	0.43971119133574	282.887094175182	0.088299368392317	4.08848277031937
B8_2	B	4.0	31.0	27.0	6.286	3.472	0.447661469933185	518.806726061815	0.149188015554707	13.7514058070666
B8_3	C	4.0	31.0	27.0	16.933	6.301	0.627886375716057	803.108700750997	0.0515057089111585	32.9522113689897
B8_4	C	4.0	31.0	27.0	10.129	2.395	0.76355020238918	772.880438911852	0.0556686270446118	30.5183137910382
B8_5	C	4.0	31.0	27.0	2.543	1.17	0.539913488006292	451.853244834241	0.0825919917562074	10.4311145201669
B8_6	C	4.0	31.0	27.0	7.142	2.662	0.627275273032764	892.28007459256	0.068273468102374	40.6760050430965
B8_7	C	4.0	31.0	27.0	8.116	3.4	0.581074420896994	1017.58610750914	0.0383182074858158	52.9027491297334
B8_8	D	4.0	31.0	27.0	6.188	2.762	0.553652230122818	893.480190062701	0.0684670808480595	40.7854969682616
B9_1	A	4.0	31.0	27.0	15.628	6.587	0.578512925518301	909.796167792391	0.0627109643762911	42.2886780294394
B9_2	B	4.0	31.0	27.0	3.068	1.821	0.40645371577575	445.847161811251	0.10287049784975	10.1556544487051
B9_3	C	4.0	31.0	27.0	7.291	3.706	0.491702098477575	747.830102299702	0.0847610815202022	28.5720754447562
B9_4	C	4.0	31.0	27.0	7.506	3.501	0.533573141486811	806.278124904306	0.17953988267471	33.2128127469823
B9_5	C	4.0	31.0	27.0	13.506	6.211	0.540130312453724	1221.1392426584	0.0927316573628418	76.1844398424733
B9_6	D	4.0	31.0	27.0	3.53	1.984	0.437960339943343	643.510956037953	0.126962733021901	21.1566934491336
B10_1	A	4.0	31.0	27.0	2.566	1.412	0.449727201870616	331.091361327616	0.0667148846179196	5.60056190089359
B10_2	B	4.0	31.0	27.0	7.413	3.136	0.57695939565628	566.32519578603	0.151264295321274	16.3858007769507
B10_3	C	4.0	31.0	27.0	8.998	3.217	0.642476105801289	718.581708840457	0.0593443084332128	26.3808156567888
B10_4	C	4.0	31.0	27.0	2.89	1.201	0.584429065743945	463.275327601684	0.163185352646192	10.9651416500116
B10_5	C	4.0	31.0	27.0	7.513	2.954	0.606814854252629	835.438875495411	0.0573833564347829	35.6586800794629
B10_6	D	4.0	31.0	27.0	13.844	4.937	0.64338341519792	1301.45369213109	0.0565159740730756	86.5353077049925
C1_1	A	4.9	29.0	27.6	4.881	1.342	0.725056340913747	632.544634459959	0.0789346549107859	20.4417585881008
C1_2	B	4.9	29.0	27.6	9.473	1.778	0.812308666737042	986.196986299658	0.116779813709192	49.6893418897337
C1_3	C	4.9	29.0	27.6	13.075	2.017	0.845736137667304	1069.83278862977	0.0515656999002226	58.4746607746013
C1_4	C	4.9	29.0	27.6	6.217	1.041	0.832555895126267	783.573992338957	0.10688738568836	31.3686572131029
C1_5	C	4.9	29.0	27.6	2.371	0.539	0.772669759595108	527.904432235521	0.12685086960124	14.237919046331
C1_6	D	4.9	29.0	27.6	4.19	1.068	0.745107398568019	824.191397361118	0.0767610286907849	34.7050006650413
C2_1	A	4.9	29.0	27.6	2.399	0.988	0.588161734055857	414.481686956938	0.202576518561749	8.77701006615017
C2_2	C	4.9	29.0	27.6	2.423	1.238	0.489063144861742	448.40440993934	0.297629234371901	10.2724882438422
C2_3	C	4.9	29.0	27.6	10.04	3.945	0.60707171314741	1001.30870911641	0.0515173975898892	51.2238114003567
C2_4	D	4.9	29.0	27.6	14.621	6.548	0.552151015662403	1303.87793145725	0.0635602689225246	86.8579894566158
C3_1	A	4.9	29.0	27.6	4.592	2.625	0.428353658536585	423.310185370151	0.171270404706953	9.15489440111712
C3_2	B	4.9	29.0	27.6	15.078	7.3	0.515850908608569	972.446901585994	0.0439541015435898	48.3134105644906
C3_3	C	4.9	29.0	27.6	17.761	6.799	0.617194977760261	1138.69359490394	0.0939470842278242	66.244474336115
C3_4	C	4.9	29.0	27.6	11.108	3.946	0.644760532949226	919.973013306501	0.176446494134738	43.2400391368935
C3_5	C	4.9	29.0	27.6	4.281	1.678	0.608035505722962	590.423355174961	0.0534926560140424	17.8099606315892
C3_6	C	4.9	29.0	27.6	12.654	3.882	0.693219535324799	1048.13407576861	0.109850551216425	56.1267097338241
C3_7	C	4.9	29.0	27.6	10.289	3.161	0.692778695694431	1050.65135180205	0.0598782234295486	56.3966295588911
C3_8	D	4.9	29.0	27.6	15.538	4.696	0.697773201184194	1325.0359126092	0.0733668248699633	89.6997434701823
C4_1	A	4.9	29.0	27.6	3.132	1.79	0.428480204342273	382.207654001794	0.107259210050806	7.46336467182529
C4_2	B	4.9	29.0	27.6	8.192	4.544	0.4453125	702.378202508867	0.10127321281383	25.2044922698813
C4_3	C	4.9	29.0	27.6	10.768	5.016	0.534175334323923	929.51487854478	0.107909176288176	44.1416531930912
C4_4	C	4.9	29.0	27.6	14.198	6.05	0.573883645583885	1223.94261331088	0.0391245771270578	76.5346347514526
C4_5	D	4.9	29.0	27.6	11.176	5.154	0.538833214030064	1235.76610288925	0.0972388980105193	78.0204515210488
C5_1	A	4.9	29.0	27.6	3.626	1.456	0.598455598455598	457.7008666581	0.17094399111573	10.7028483578189
C5_2	B	4.9	29.0	27.6	4.663	2.092	0.551361784259061	541.761359457824	0.0762737742521375	14.9951893840352
C5_3	C	4.9	29.0	27.6	9.396	3.301	0.648680289484887	874.411605504179	0.142115801239143	39.0631920568858
C5_4	C	4.9	29.0	27.6	14.157	4.671	0.670057215511761	1198.06264797483	0.0537236998042502	73.3322414018581
C5_5	C	4.9	29.0	27.6	9.375	2.746	0.707093333333333	973.582548605805	0.08144225336967	48.426319594544
C5_6	D	4.9	29.0	27.6	9.779	3.555	0.636465896308416	1092.59206777652	0.166918021952966	60.9890669233679
C6_1	A	4.9	29.0	27.6	3.928	2.207	0.438136456211813	432.387099976415	0.0739274413988621	9.55171508990707
C6_2	B	4.9	29.0	27.6	3.53	1.985	0.437677053824363	413.173965714406	0.193841478870449	8.7217131684876
C6_3	C	4.9	29.0	27.6	6.624	3.66	0.447463768115942	674.774163236019	0.110930692660986	23.2623075553377
C6_4	C	4.9	29.0	27.6	9.651	4.586	0.524816081235105	941.274148491666	0.0558874936321739	45.2655878855899
C6_5	D	4.9	29.0	27.6	9.428	3.879	0.588565973695375	1041.39537360865	0.0900035990883419	55.4073259220241
C7_1	A	4.9	29.0	27.6	3.207	1.567	0.511381353289679	374.149361835291	0.299766671477682	7.15197389009609
C7_2	B	4.9	29.0	27.6	3.228	1.514	0.530978934324659	418.046764326372	0.169021783764808	8.92864663409595
C7_3	C	4.9	29.0	27.6	8.209	3.765	0.541357047143379	737.874082888043	0.075478241433299	27.8163675066892
C7_4	C	4.9	29.0	27.6	4.535	2.061	0.545534729878721	638.182769653052	0.062670524492958	20.8077945738574
C7_5	C	4.9	29.0	27.6	10.093	4.339	0.570098087783612	1042.46473791859	0.0890079678890535	55.5211751656697
C7_6	D	4.9	29.0	27.6	4.691	3.055	0.348752931144745	840.583172034906	0.0996133238527925	36.0991757307412
C8_1	A	4.9	29.0	27.6	4.842	3.143	0.350888062783974	494.857885037403	0.174551129865116	12.5111402349428
C8_2	C	4.9	29.0	27.6	8.379	4.784	0.429048812507459	792.647767210392	0.0565085422134797	32.0993607695023
C8_3	C	4.9	29.0	27.6	12.735	6.616	0.4804868472713	1041.58129702215	0.0694706264362966	55.4271117574711
C8_4	D	4.9	29.0	27.6	10.02	5.17	0.484031936127745	962.876660545321	0.065390573494684	47.3671464662764
C9_1	A	4.9	29.0	27.6	1.847	0.942	0.489983757444505	346.334973705755	0.0746639457718977	6.12813892686112
C9_2	B	4.9	29.0	27.6	15.321	5.366	0.649761764897853	801.258571786763	0.0524691495546149	32.8005616188475
C9_3	C	4.9	29.0	27.6	21.527	5.878	0.726947554234217	1041.07441981281	0.123846709881332	55.3731785623005
C9_4	C	4.9	29.0	27.6	8.254	2.56	0.689847346740974	651.775127338009	0.0308364360066838	21.7035846209359
C9_5	C	4.9	29.0	27.6	14.746	4.439	0.698969211989692	1017.98855874407	0.089056005600983	52.9446030559413
C9_6	C	4.9	29.0	27.6	6.785	2.109	0.689167280766396	795.647945154911	0.0538933643302783	32.3428132928275
C9_7	D	4.9	29.0	27.6	7.386	3.087	0.582047116165719	1022.72510614228	0.10341161487626	53.4384357772667
C10_1	A	4.9	29.0	27.6	4.37	3.093	0.292219679633867	431.447713681408	0.106210235887344	9.51025685335431
C10_2	C	4.9	29.0	27.6	6.58	4.027	0.387993920972644	588.50746526881	0.0806574432089342	17.694563563834
C10_3	C	4.9	29.0	27.6	11.528	6.306	0.452984038861902	994.863789496447	0.0674312820412289	50.5665297985814
C10_4	D	4.9	29.0	27.6	8.202	4.599	0.439283101682516	947.270208341198	0.0517363478767119	45.8441221044346
D1_1	A	9.2	10.2	12.0	2.181	0.695	0.681338835396607	416.647123290741	0.0908838735519996	8.86895962695013
D1_2	C	9.2	10.2	12.0	5.485	1.52	0.722880583409298	747.694364807544	0.115459471893755	28.5617042390976
D1_3	C	9.2	10.2	12.0	4.59	1.19	0.740740740740741	776.569992487515	0.106232917139262	30.8103841006259
D1_4	D	9.2	10.2	12.0	5.546	1.421	0.743779300396682	899.666833323955	0.0721368865513665	41.3522669971293
D2_1	A	9.2	10.2	12.0	1.731	0.829	0.521086077411901	291.371729039902	0.365249019698603	4.33741248227234
D2_2	B	9.2	10.2	12.0	2.836	1.467	0.482722143864598	422.003927805268	0.213423816559282	9.09848092759424
D2_3	C	9.2	10.2	12.0	4.696	2.237	0.523637137989778	397.932563780221	0.111887813074227	8.09011812043019
D2_4	C	9.2	10.2	12.0	10.899	4.148	0.619414625194972	599.150268540207	0.0513666174154156	18.3403415528682
D2_5	C	9.2	10.2	12.0	12.994	4.526	0.651685393258427	1046.42301872304	0.0445596712656543	55.9436079418556
D2_6	C	9.2	10.2	12.0	13.484	5.041	0.626149510531	1214.21021368499	0.0738716123200225	75.3223161737359
D2_7	D	9.2	10.2	12.0	4.361	2.218	0.491401054803944	1369.62455538785	0.0665925457205222	95.8382709868346
D3_1	A	9.2	10.2	12.0	7.462	4.318	0.421334762798178	450.215231989683	0.160149068469429	10.3556239488521
D3_2	C	9.2	10.2	12.0	22.179	5.555	0.749537851120429	989.328407818991	0.0530113500560829	50.0053949872672
D3_3	C	9.2	10.2	12.0	9.434	2.856	0.697265210939156	726.200630771228	0.206324368304068	26.9431982248109
D3_4	D	9.2	10.2	12.0	17.439	4.772	0.726360456448191	958.554665274514	0.0604117078258472	46.9428737964651
D4_1	A	9.2	10.2	12.0	4.387	2.577	0.412582630499202	392.97391861377	0.0659612397941233	7.88975210130772
D4_2	B	9.2	10.2	12.0	2.218	1.138	0.48692515779982	324.311727375375	0.118940600582548	5.37354895085937
D4_3	C	9.2	10.2	12.0	4.616	1.889	0.5907712305026	567.075178123316	0.0622515162709509	16.429228823011
D4_4	C	9.2	10.2	12.0	11.876	4.09	0.655607948804311	981.974616093466	0.0599512594463108	49.2647661524461
D4_5	C	9.2	10.2	12.0	7.574	2.476	0.673092157380512	896.426366510376	0.0869645119671815	41.0549139800765
D4_6	D	9.2	10.2	12.0	9.249	2.688	0.709373986376906	1142.2712568293	0.0625138409318658	66.6613953592739
D5_1	A	9.2	10.2	12.0	9.596	4.873	0.492184243434764	605.703445297312	0.320029946040208	18.7437287456248
D5_2	C	9.2	10.2	12.0	14.909	4.352	0.708095781071836	847.046858248775	0.0949866236872336	36.6564813377314
D5_3	C	9.2	10.2	12.0	19.119	4.394	0.770176264448977	1111.20481042508	0.101527651667583	63.0847125180678
D5_4	D	9.2	10.2	12.0	30.113	6.071	0.798392720751835	1518.57256113978	0.0707707593548968	117.816739431888
D6_1	A	9.2	10.2	12.0	3.051	1.501	0.508030154047853	340.533201311026	0.0971013801235906	5.92454257845949
D6_2	B	9.2	10.2	12.0	3.919	1.786	0.544271497831079	355.326213207019	0.378725356568479	6.45045571199532
D6_3	C	9.2	10.2	12.0	8.985	4.134	0.539899833055092	742.77602861923	0.0917840003467006	28.1871821238413
D6_4	C	9.2	10.2	12.0	11.858	3.962	0.665879574970484	882.313844329165	0.0611009732897565	39.772426709431
D6_5	D	9.2	10.2	12.0	18.356	5.376	0.707125735454347	1089.05833429004	0.10268117917191	60.5951951548102
D7_1	A	9.2	10.2	12.0	4.714	2.379	0.495333050487908	460.106967348824	0.103879831229605	10.8156723494758
D7_2	C	9.2	10.2	12.0	4.706	2.287	0.514024649383765	601.000840838506	0.102204435597565	18.4538107260801
D7_3	C	9.2	10.2	12.0	4.096	1.931	0.528564453125	624.225232856981	0.295303972534973	19.9075833508231
D7_4	D	9.2	10.2	12.0	12.828	5.941	0.536872466479576	1293.67773306753	0.0855144988495754	85.504330115705
D8_1	A	9.2	10.2	12.0	1.977	0.724	0.633788568538189	345.465602852996	0.243550219832885	6.0974118039317
D8_2	B	9.2	10.2	12.0	6.965	1.382	0.801579325197416	771.135337544227	0.105182301421907	30.3806536230748
D8_3	C	9.2	10.2	12.0	1.909	0.423	0.77841801990571	432.956164979579	0.124849984911923	9.57687367415649
D8_4	C	9.2	10.2	12.0	3.679	0.565	0.846425659146507	506.42411144464	0.0948515335741161	13.1028162975359
D8_5	C	9.2	10.2	12.0	5.738	0.91	0.841408156151969	717.14056135022	0.0969878534253305	26.2751059740452
D8_6	D	9.2	10.2	12.0	4.595	0.792	0.827638737758433	721.050753431909	0.0696440734520268	26.5624159172731
D9_1	A	9.2	10.2	12.0	2.753	1.392	0.494369778423538	382.387289788501	0.258823733507475	7.47038181252681
D9_2	B	9.2	10.2	12.0	14.417	3.61	0.749601165290976	907.763354712761	0.15873056017295	42.099912803862
D9_3	C	9.2	10.2	12.0	8.1	2.032	0.749135802469136	667.626149376349	0.16968945661861	22.7720736626654
D9_4	C	9.2	10.2	12.0	4.068	1.125	0.723451327433628	594.141723914246	0.099766987229658	18.034994187814
D9_5	C	9.2	10.2	12.0	9.71	2.449	0.74778578784758	900.547342207286	0.109669348043762	41.433249989787
D9_6	C	9.2	10.2	12.0	11.545	2.113	0.816977046340407	921.04604131252	0.0396448140728142	43.3409656440102
D9_7	D	9.2	10.2	12.0	14.717	2.5	0.830128422912278	1062.83830962742	0.0735825544428818	57.7125551675123
D10_1	A	9.2	10.2	12.0	8.676	5.902	0.319732595666206	512.612844325298	0.355101981595226	13.4250178100659
D10_2	B	9.2	10.2	12.0	3.851	2.29	0.405349259932485	360.02806878268	0.0552055819500593	6.62229654480872
D10_3	C	9.2	10.2	12.0	8	3.916	0.5105	545.652410625386	0.0885374749536224	15.211360504076
D10_4	C	9.2	10.2	12.0	11.962	4.405	0.631750543387393	669.833958110864	0.383651493799171	22.9229350811913
D10_5	C	9.2	10.2	12.0	3.912	1.107	0.717024539877301	477.273683929826	0.0669198003545954	11.6377997532128
D10_6	C	9.2	10.2	12.0	14.55	2.671	0.816426116838488	860.332350993593	0.123148587910945	37.8153749203493
D10_7	D	9.2	10.2	12.0	22720	3.973	0.999825132042253	1208.34180917242	0.0793370947722664	74.5959944109994
E1_1	A	2.0	55.0	42.6	6.196	2.349	0.62088444157521	672.906145496852	0.125802336358157	23.1336889542772
E1_2	B	2.0	55.0	42.6	3.771	1.389	0.631662688941925	525.081094803304	0.131267517339905	14.0860318761624
E1_3	C	2.0	55.0	42.6	1.938	0.934	0.518059855521156	402.11796581079	0.0973396342525096	8.26119467707669
E1_4	C	2.0	55.0	42.6	3.738	1.56	0.582664526484751	575.512014336687	0.152705327128022	16.9217272780175
E1_5	C	2.0	55.0	42.6	13.744	4.098	0.701833527357392	1105.7662176899	0.0780128094742955	62.4687100409322
E1_6	C	2.0	55.0	42.6	8.799	2.976	0.661779747698602	917.663344744021	0.0925838464304151	43.0231962699118
E1_7	D	2.0	55.0	42.6	5.121	2.37	0.537199765670767	832.856160377934	0.0677258628642392	35.4385470224024
E2_1	A	2.0	55.0	42.6	1.566	0.754	0.518518518518519	300.498656889516	0.150526260776779	4.61339853226387
E2_2	B	2.0	55.0	42.6	4	1.977	0.50575	433.958265268302	0.0890045647578342	9.62125735556789
E2_3	C	2.0	55.0	42.6	8.417	3.44	0.591303314720209	803.344829781998	0.122975046453431	32.9715913548092
E2_4	C	2.0	55.0	42.6	4.259	1.701	0.60061047194177	600.000361591752	0.0895544130039921	18.3924221684738
E2_5	C	2.0	55.0	42.6	7.805	2.957	0.621140294682896	858.943699963977	0.221372825708941	37.6933988502718
E2_6	C	2.0	55.0	42.6	6.902	2.509	0.636482179078528	805.124296395977	0.0806312293914882	33.1178220269412
E2_7	C	2.0	55.0	42.6	11.464	3.508	0.693998604326588	1122.58093520609	0.0892524510036987	64.3830026765451
E2_8	C	2.0	55.0	42.6	10.185	2.506	0.753951890034364	1070.19790579921	0.0867705050272042	58.5145805566097
E2_9	D	2.0	55.0	42.6	10.54	2.452	0.767362428842505	1077.92679463854	0.0891847608012424	59.3628082602996
E3_1	A	2.0	55.0	42.6	11.265	5.757	0.488948069241012	616.295450313345	0.0894742309086132	19.4050079933103
E3_2	B	2.0	55.0	42.6	11.204	3.874	0.654230631917172	787.271221147135	0.217585492806226	31.6653763957797
E3_3	C	2.0	55.0	42.6	15.208	4.719	0.689702788006312	828.019809364232	0.0821797286763005	35.0281625521015
E3_4	C	2.0	55.0	42.6	7.918	3.246	0.590047991917151	580.305726795273	0.124861753909916	17.2047994904105
E3_5	C	2.0	55.0	42.6	28.77	9.641	0.664893986791797	1112.35268213652	0.132291756900925	63.2151125263229
E3_6	C	2.0	55.0	42.6	20.936	5.681	0.728649216660298	1129.67029982499	0.0965281410694007	65.1987582504084
E3_7	C	2.0	55.0	42.6	21.157	4.467	0.788864205700241	1124.6558329517	0.0901307177148631	64.6212244390397
E3_8	C	2.0	55.0	42.6	7.232	2.139	0.704231194690266	707.167154697748	0.104035810879236	25.5493623034702
E3_9	D	2.0	55.0	42.6	11.599	3.285	0.716785929821536	1036.31551977958	0.10180917440076	54.8680981704253
E4_1	A	2.0	55.0	42.6	13.635	6.452	0.526806013934727	706.866710772141	0.154641063932263	25.5276573359009
E4_2	B	2.0	55.0	42.6	18.819	7.187	0.618098730006908	900.310539758235	0.0699060386217692	41.411462784108
E4_3	C	2.0	55.0	42.6	10.303	4.192	0.593128215082986	837.838796658998	0.046365382182742	35.8638439549637
E4_4	C	2.0	55.0	42.6	16.362	5.658	0.654198753208654	1066.80094774228	0.0370622348132331	58.1437031508845
E4_5	C	2.0	55.0	42.6	27.778	8.894	0.679818561451508	1465.05886959963	0.0961263761199333	109.659447835245
E4_6	C	2.0	55.0	42.6	10.074	2.417	0.760075441731189	872.943796819198	0.0941636877817948	38.9321572711774
E4_7	D	2.0	55.0	42.6	29.876	4.793	0.839570223590842	1452.41609593155	0.100603294453923	107.774994428188
E5_1	A	2.0	55.0	42.6	5.129	2.606	0.491908754143108	438.372602302364	0.161420554893958	9.81799280937712
E5_2	B	2.0	55.0	42.6	22.252	10.187	0.542198454071544	817.988956914963	0.0589305338857102	34.1846221494034
E5_3	C	2.0	55.0	42.6	28.649	10.55	0.631749799294914	1152.54624756597	0.0803761430094394	67.8660581484484
E5_4	C	2.0	55.0	42.6	49.358	9.685	0.803780542161352	1441.82333888136	0.0722829053517724	106.208678476342
E5_5	C	2.0	55.0	42.6	3.21	1.237	0.614641744548287	563.455192948743	0.108825607772652	16.2201428354077
E5_6	C	2.0	55.0	42.6	5.661	2.288	0.59583112524289	815.734795017526	0.134548594449062	33.9964741389388
E5_7	C	2.0	55.0	42.6	4.475	2.423	0.45854748603352	815.677869203465	0.0641231979974492	33.9917294364913
E5_8	C	2.0	55.0	42.6	5.572	2.676	0.519741564967696	817.081455659893	0.101648251660025	34.1088133538143
E5_9	D	2.0	55.0	42.6	4.779	2.67	0.441305712492153	703.805654716244	0.106532645216236	25.3070431961036
E6_1	A	2.0	55.0	42.6	12.738	3.862	0.696812686449992	654.110147830222	0.128193302478315	21.8593717679127
E6_2	B	2.0	55.0	42.6	3.944	1.854	0.529918864097363	455.328260950038	0.0532776160277697	10.5921742304789
E6_3	C	2.0	55.0	42.6	7.115	2.497	0.649051300070274	725.267884290438	0.083360012952857	26.874029918498
E6_4	C	2.0	55.0	42.6	8.057	2.793	0.653344917463076	836.256477263425	0.0829876229464214	35.7285089246356
E6_5	C	2.0	55.0	42.6	10.665	3.216	0.69845288326301	1029.38084938643	0.0460363620119426	54.1362378312375
E6_6	C	2.0	55.0	42.6	9.182	2.483	0.729579612284905	933.944986191094	0.0647270308143214	44.5634178901565
E6_7	C	2.0	55.0	42.6	1.409	0.621	0.559261887863733	335.2208840319	0.125118271766029	5.74113866934576
E6_8	C	2.0	55.0	42.6	7.046	3.153	0.552512063582174	809.480188510019	0.157248466234976	33.4771401909041
E6_9	C	2.0	55.0	42.6	2.627	0.959	0.634944803958888	502.771250279995	0.390007821679531	12.9144755392233
E6_10	C	2.0	55.0	42.6	6.903	2.443	0.646095900333189	796.375603879297	0.152121236388781	32.4019984943807
E6_11	C	2.0	55.0	42.6	7.837	2.7	0.655480413423504	926.832834189962	0.117915691797874	43.8872859483904
E6_12	D	2.0	55.0	42.6	5.034	2.052	0.592371871275328	749.696914844246	0.0528463057766073	28.7149027622474
E7_1	A	2.0	55.0	42.6	7.427	4.218	0.432072169112697	530.170691470561	0.0972673402246117	14.3604263534015
E7_2	B	2.0	55.0	42.6	4.933	2.622	0.468477599837827	484.686811387996	0.113811199596795	12.0021294792686
E7_3	C	2.0	55.0	42.6	6.763	3.085	0.543841490462812	640.469267025727	0.0909007555511335	20.9571630616085
E7_4	C	2.0	55.0	42.6	6.337	3.326	0.475145968123718	680.650353023062	0.0945522012162014	23.6692256978677
E7_5	C	2.0	55.0	42.6	6.858	3.897	0.431758530183727	672.156918578738	0.0568482568161506	23.0822026259439
E7_6	C	2.0	55.0	42.6	5.962	2.796	0.531029855753103	684.471486803227	0.155788288076361	23.9357271380398
E7_7	C	2.0	55.0	42.6	10.987	4.875	0.556293801765723	1123.45537752317	0.140426202629573	64.4833449282479
E7_8	D	2.0	55.0	42.6	8.245	4.531	0.450454821103699	1069.85980063709	0.0865222390079671	58.4776136433527
E8_1	A	2.0	55.0	42.6	6.325	3.424	0.458656126482213	504.748281369479	0.143990376374314	13.0162415792967
E8_2	B	2.0	55.0	42.6	3.756	1.829	0.513045793397231	430.76620894656	0.0777405117162492	9.48023622268908
E8_3	C	2.0	55.0	42.6	11.879	3.927	0.669416617560401	850.774453337396	0.0585762421446401	36.9798192383694
E8_4	C	2.0	55.0	42.6	9.912	3.436	0.653349475383374	852.951993432649	0.0558124622730583	37.1693596974163
E8_5	C	2.0	55.0	42.6	1.501	0.827	0.449033977348434	402.987590391844	0.196093316577521	8.29696480832194
E8_6	C	2.0	55.0	42.6	4.019	1.81	0.54963921373476	677.687391062037	0.0784422859214452	23.4636036182284
E8_7	C	2.0	55.0	42.6	5.422	2.257	0.583732939874585	844.290751658118	0.0452601221607314	36.4183249587071
E8_8	C	2.0	55.0	42.6	4.208	1.816	0.568441064638783	767.658255171388	0.0483635544078119	30.1072959610777
E8_9	D	2.0	55.0	42.6	3.922	2.098	0.465068842427333	832.763935019907	0.0546339718645537	35.4306989643941
E9_1	A	2.0	55.0	42.6	14.452	4.407	0.695059507334625	1005.21569536479	0.088721790921836	51.6243295780723
E9_2	B	2.0	55.0	42.6	6.414	1.92	0.700654817586529	666.831790483494	0.0724445308181773	22.7179162940825
E9_3	C	2.0	55.0	42.6	0.937	0.487	0.48025613660619	282.130400643483	0.144186429329479	4.06663949199692
E9_4	C	2.0	55.0	42.6	2.78	1.213	0.563669064748201	497.950808812501	0.175327087325676	12.668021358568
E9_5	C	2.0	55.0	42.6	7.157	3.171	0.556937264216851	925.875777352384	0.0328283492412978	43.7966958454399
E9_6	C	2.0	55.0	42.6	4.988	2.196	0.559743384121892	822.400188193966	0.0849619637630904	34.5543163328737
E9_7	D	2.0	55.0	42.6	6.735	3.172	0.529027468448404	984.770495889138	0.125127513450673	49.5456989719223
E10_1	A	2.0	55.0	42.6	4.385	1.183	0.730216647662486	394.692012802339	0.0998116107666465	7.95889139411534
E10_2	B	2.0	55.0	42.6	11.983	2.189	0.817324543102729	703.592784124986	0.0775477072525588	25.2917369520388
E10_3	C	2.0	55.0	42.6	0.766	0.315	0.588772845953003	255.837451994523	0.071728761244485	3.34398364616142
E10_4	C	2.0	55.0	42.6	3.733	1.326	0.644789713367265	629.613254874336	0.0387179453424275	20.2527325429504
E10_5	C	2.0	55.0	42.6	5.149	1.822	0.646144882501457	778.065297380407	0.107666917045013	30.9291506609996
E10_6	C	2.0	55.0	42.6	8.904	2.905	0.67374213836478	1086.57101452172	0.0631892571852713	60.3187223408006
E10_7	C	2.0	55.0	42.6	5.822	2.133	0.633631054620405	939.972286960927	0.0344237294736495	45.1404622240052
E10_8	D	2.0	55.0	42.6	4.898	2.038	0.583911800734994	867.899293060943	0.0855715361125692	38.4835007541405
F1_1	A	0.5	90.0	66.7	3.369	2.354	0.301276343128525	415.724483141955	0.116518107979623	8.82972355619545
F1_2	B	0.5	90.0	66.7	8.441	4.558	0.460016585712593	697.275048734572	0.188800691745086	24.8395744974007
F1_3	C	0.5	90.0	66.7	21.267	7.37	0.653453707622138	1008.41943617245	0.0904758384095892	51.953919600101
F1_4	C	0.5	90.0	66.7	15.986	5.348	0.665457275115726	981.03378810082	0.12217410054967	49.1704104195733
F1_5	C	0.5	90.0	66.7	9.702	4.395	0.54700061842919	845.241066509406	0.124942398202372	36.5003544076581
F1_6	D	0.5	90.0	66.7	5.504	2.857	0.480922965116279	664.333486916313	0.0739440352725738	22.5480085821232
F2_1	A	0.5	90.0	66.7	2.641	1.403	0.468761832639152	366.330470157452	0.152578653970589	6.85617650285769
F2_2	B	0.5	90.0	66.7	2.808	1.585	0.43554131054131	388.134930923793	0.154804531045355	7.69664333997839
F2_3	C	0.5	90.0	66.7	2.909	1.237	0.574767961498797	476.857389434427	0.149793753275026	11.6175068300563
F2_4	C	0.5	90.0	66.7	1.766	0.783	0.556625141562854	387.795094840438	0.256878071544006	7.68317146789993
F2_5	C	0.5	90.0	66.7	6.061	2.735	0.548754330968487	745.86401373184	0.101425422637015	28.4220376574169
F2_6	C	0.5	90.0	66.7	6.588	2.653	0.597298117789921	825.9884452279	0.131381352613368	34.8565056161987
F2_7	C	0.5	90.0	66.7	4.95	2.321	0.531111111111111	725.878990377317	0.0572679123166788	26.9193367700113
F2_8	D	0.5	90.0	66.7	5.221	2.477	0.525569814211837	790.066381509516	0.0777848371766592	31.8906276866158
F3_1	A	0.5	90.0	66.7	6.16	1.94	0.685064935064935	504.740533428394	0.197000401754068	13.0158419809123
F3_2	B	0.5	90.0	66.7	4.039	1.769	0.562020302054964	458.797926300362	0.185227473241368	10.7542169943991
F3_3	C	0.5	90.0	66.7	7.854	2.428	0.690858161446397	670.03538293078	0.130409044111272	22.9367234006332
F3_4	C	0.5	90.0	66.7	5.088	1.82	0.642295597484277	630.411243705483	0.133717585687502	20.3041027959621
F3_5	C	0.5	90.0	66.7	8.102	2.9	0.642063687978277	899.51182519053	0.062166091595112	41.3380186436667
F3_6	C	0.5	90.0	66.7	7.347	2.978	0.594664488907037	895.11456608905	0.0484744374581192	40.9348451154424
F3_7	D	0.5	90.0	66.7	2.384	1.013	0.57508389261745	502.597978926857	0.124000892654343	12.9055755750474
F4_1	A	0.5	90.0	66.7	5.182	2.401	0.5366653801621	584.798159504925	0.0932585021820464	17.4722122552402
F4_2	B	0.5	90.0	66.7	6.471	2.264	0.650131355277391	713.566482591871	0.048463129126261	26.0138593202624
F4_3	C	0.5	90.0	66.7	6.781	2.658	0.608022415572924	819.001872822099	0.0795287984710191	34.2693362180831
F4_4	C	0.5	90.0	66.7	3.5	1.678	0.520571428571429	652.932545188262	0.144836506388771	21.7807352186381
F4_5	C	0.5	90.0	66.7	1.909	0.83	0.565217391304348	475.773983017546	0.244607944685125	11.5647775081979
F4_6	D	0.5	90.0	66.7	3.694	1.722	0.533838657282079	632.646514120042	0.0628224342478332	20.4483439483048
F5_1	A	0.5	90.0	66.7	4.392	2.377	0.458788706739527	404.988861882896	0.0778690357900887	8.3795763287518
F5_2	B	0.5	90.0	66.7	1.944	1.139	0.414094650205761	323.81517930878	0.0470765335648105	5.35710685222121
F5_3	C	0.5	90.0	66.7	3.504	1.424	0.593607305936073	537.930412870637	0.116510696478685	14.7838688052681
F5_4	C	0.5	90.0	66.7	9.081	3.477	0.617112652791543	950.313503340917	0.111693490109761	46.1391621041533
F5_5	C	0.5	90.0	66.7	7.274	2.761	0.620428924938136	801.56764773143	0.182161621422117	32.8258713508247
F5_6	D	0.5	90.0	66.7	5.452	2.291	0.579787234042553	796.337775164336	0.187374950247894	32.3989203065317
F6_1	A	0.5	90.0	66.7	2.47	1.261	0.489473684210526	336.211387984821	0.0782560801395762	5.77511639671163
F6_2	B	0.5	90.0	66.7	5.359	2.125	0.603470796790446	574.123017930645	0.143712073054476	16.840144777182
F6_3	C	0.5	90.0	66.7	2.275	0.973	0.572307692307692	382.493528718505	0.199383518209225	7.47453339204426
F6_4	C	0.5	90.0	66.7	4.777	1.748	0.634079966506175	641.762680882038	0.0772608950964376	21.0418936076895
F6_5	C	0.5	90.0	66.7	6.899	2.549	0.63052616321206	805.356129251516	0.127174646439762	33.1368971056153
F6_6	C	0.5	90.0	66.7	7.934	3.019	0.61948575749937	916.847189064754	0.0818943548399899	42.9467019620216
F6_7	C	0.5	90.0	66.7	3.348	1.353	0.595878136200717	580.577533854449	0.0711254236432692	17.2209202381957
F6_8	D	0.5	90.0	66.7	4.006	1.507	0.623814278582127	606.992991648803	0.142114277415115	18.8236247317209
F7_1	A	0.5	90.0	66.7	7.62	3.77	0.505249343832021	509.118280843724	0.197528327180802	13.2426007465028
F7_2	B	0.5	90.0	66.7	2.019	0.97	0.519564140663695	343.506495635052	0.161059986947122	6.02845204384609
F7_3	C	0.5	90.0	66.7	5.65	2.019	0.642654867256637	609.984530888154	0.0693355399639544	19.009624825578
F7_4	C	0.5	90.0	66.7	11.815	3.736	0.683791790097334	914.591359876181	0.0711773788117139	42.7356280955687
F7_5	C	0.5	90.0	66.7	3.917	1.431	0.634669389839163	656.674769662899	0.0800035932680455	22.031119366483
F7_6	C	0.5	90.0	66.7	4.498	1.803	0.599155180080036	763.512245416261	0.122364467596308	29.7829639793307
F7_7	D	0.5	90.0	66.7	5.565	2.384	0.571608265947889	888.157074931359	0.0461485612437466	40.3009665463596
F8_1	A	0.5	90.0	66.7	2.265	1.481	0.346136865342163	388.462445199907	0.173704638971258	7.70963791428499
F8_2	B	0.5	90.0	66.7	7.05	3.749	0.46822695035461	765.802783114109	0.0324326911077219	29.9619298851273
F8_3	C	0.5	90.0	66.7	13.837	6.003	0.566163185661632	1081.9942142511	0.132191599937094	59.8116494964862
F8_4	C	0.5	90.0	66.7	9.653	4.589	0.524603750129493	977.240166151482	0.188817786871788	48.7908653101392
F8_5	D	0.5	90.0	66.7	6.441	2.819	0.56233504114268	886.206651375511	0.067719524898776	40.1241562766568
F9_1	A	0.5	90.0	66.7	3.42	1.653	0.516666666666667	406.324624142089	0.130531767657507	8.43494368241129
F9_2	B	0.5	90.0	66.7	2.974	1.302	0.562205783456624	418.905950926959	0.110750457805218	8.96538537943799
F9_3	C	0.5	90.0	66.7	3.749	1.605	0.571885836222993	499.909159121355	0.232764342134448	12.767859361108
F9_4	C	0.5	90.0	66.7	3.889	1.655	0.57444073026485	608.437850998207	0.09641793622585	18.9133452405606
F9_5	C	0.5	90.0	66.7	6.361	2.497	0.607451658544254	802.228194566675	0.0767248922731378	32.8799951908973
F9_6	C	0.5	90.0	66.7	4.777	1.99	0.583420556834834	721.898348852303	0.0649881283560399	26.6249008802066
F9_7	D	0.5	90.0	66.7	2.022	0.817	0.595944609297725	455.875865298835	0.0414290491116786	10.6176670850706
F10_1	A	0.5	90.0	66.7	2.48	1.389	0.43991935483871	353.931879916463	0.141144451112741	6.39993065648719
F10_2	B	0.5	90.0	66.7	6.998	3.424	0.510717347813661	692.935391611466	0.0459663782790917	24.5313466554598
F10_3	C	0.5	90.0	66.7	2.751	1.302	0.526717557251908	444.058003120608	0.164308286865891	10.0743098928208
F10_4	C	0.5	90.0	66.7	4.534	1.953	0.569254521393913	633.04964125425	0.0974114234763366	20.4744119292452
F10_5	C	0.5	90.0	66.7	7.435	3.392	0.543779421654338	843.033680048272	0.0698537236192182	36.309958591195
F10_6	D	0.5	90.0	66.7	6.452	2.814	0.563856168629882	799.77472021401	0.0868090610173802	32.6791873220417
